# Supplementary material for: Association between recovery/occurrence of metabolic syndrome and rapid estimated glomerular filtration rate decline in middle-aged and older populations: evidence from the China Health and Retirement Longitudinal Study
Source: PubMed Central journal article supplement — BMJ Open. 2022 Oct 19;12(10):e059504. doi: 10.1136/bmjopen-2021-059504 (PMC9582318; doi:10.1136/bmjopen-2021-059504), 2022-10-19
Supplement: bmjopen-2021-059504.draft_revisions.pdf [file bmjopen-2021-059504.draft_revisions.pdf]

# BMJ Open

BMJ Open is committed to open peer review. As part of this commitment we make the peer review history of every article we publish publicly available.

When an article is published we post the peer reviewers' comments and the authors' responses online. We also post the versions of the paper that were used during peer review. These are the versions that the peer review comments apply to.

The versions of the paper that follow are the versions that were submitted during the peer review process. They are not the versions of record or the final published versions. They should not be cited or distributed as the published version of this manuscript.

BMJ Open is an open access journal and the full, final, typeset and author-corrected version of record of the manuscript is available on our site with no access controls, subscription charges or pay-per-view fees (<http://bmjopen.bmj.com>).

If you have any questions on BMJ Open's open peer review process please email [info.bmjopen@bmj.com](mailto:info.bmjopen@bmj.com)

# BMJ Open

**Association between recovery/occurrence of metabolic syndrome and rapid estimated glomerular filtration rate decline in middle-aged and older populations: evidence from the China Health and Retirement Longitudinal Study**

|                               |                                                                                                                                                                                                                                                                                                                                                     |
|-------------------------------|-----------------------------------------------------------------------------------------------------------------------------------------------------------------------------------------------------------------------------------------------------------------------------------------------------------------------------------------------------|
| Journal:                      | <i>BMJ Open</i>                                                                                                                                                                                                                                                                                                                                     |
| Manuscript ID                 | bmjopen-2021-059504                                                                                                                                                                                                                                                                                                                                 |
| Article Type:                 | Original research                                                                                                                                                                                                                                                                                                                                   |
| Date Submitted by the Author: | 23-Nov-2021                                                                                                                                                                                                                                                                                                                                         |
| Complete List of Authors:     | Liu, Peijia; Third Affiliated Hospital of Sun Yat-Sen University, Tang, Leile; Third Affiliated Hospital of Sun Yat-Sen University, Department of Cardiology<br>Fang, Jia; Third Affiliated Hospital of Sun Yat-Sen University, Department of Nephrology<br>Liu, Xun; Third Affiliated Hospital of Sun Yat-Sen University, Department of Nephrology |
| Keywords:                     | Chronic renal failure < NEPHROLOGY, Lipid disorders < DIABETES & ENDOCRINOLOGY, PUBLIC HEALTH                                                                                                                                                                                                                                                       |
|                               |                                                                                                                                                                                                                                                                                                                                                     |

SCHOLARONE™  
Manuscripts

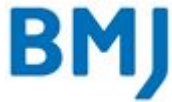

I, the Submitting Author has the right to grant and does grant on behalf of all authors of the Work (as defined in the below author licence), an exclusive licence and/or a non-exclusive licence for contributions from authors who are: i) UK Crown employees; ii) where BMJ has agreed a CC-BY licence shall apply, and/or iii) in accordance with the terms applicable for US Federal Government officers or employees acting as part of their official duties; on a worldwide, perpetual, irrevocable, royalty-free basis to BMJ Publishing Group Ltd ("BMJ") its licensees and where the relevant Journal is co-owned by BMJ to the co-owners of the Journal, to publish the Work in this journal and any other BMJ products and to exploit all rights, as set out in our [licence](#).

The Submitting Author accepts and understands that any supply made under these terms is made by BMJ to the Submitting Author unless you are acting as an employee on behalf of your employer or a postgraduate student of an affiliated institution which is paying any applicable article publishing charge ("APC") for Open Access articles. Where the Submitting Author wishes to make the Work available on an Open Access basis (and intends to pay the relevant APC), the terms of reuse of such Open Access shall be governed by a Creative Commons licence – details of these licences and which [Creative Commons](#) licence will apply to this Work are set out in our licence referred to above.

Other than as permitted in any relevant BMJ Author's Self Archiving Policies, I confirm this Work has not been accepted for publication elsewhere, is not being considered for publication elsewhere and does not duplicate material already published. I confirm all authors consent to publication of this Work and authorise the granting of this licence.

1  
2  
3  
4 **Association between recovery/occurrence of metabolic syndrome and rapid**  
5 **estimated glomerular filtration rate decline in middle-aged and older**  
6 **populations: evidence from the China Health and Retirement Longitudinal**  
7 **Study**  
8  
9  
10

11 **Peijia Liu,<sup>1</sup> Leile Tang,<sup>2</sup> Jia fang,<sup>1</sup> Xun Liu<sup>1</sup>**

12  
13 1. Department of Nephrology, The Third Affiliated Hospital of Sun Yat-Sen  
14 University, Guangzhou, Guangdong, China;

15  
16  
17 2. Department of Cardiology, The Third Affiliated Hospital of Sun Yat-Sen  
18 University, Guangzhou, Guangdong, China  
19

20  
21 **Correspondence to** Dr Xun Liu; [naturestyle@163.com](mailto:naturestyle@163.com); zip code: 510630  
22

23 **Keywords:** chronic renal failure; lipid disorders; public health  
24

25 **Word count:** 2924  
26  
27  
28  
29  
30  
31  
32  
33  
34  
35  
36  
37  
38  
39  
40  
41  
42  
43  
44  
45  
46  
47  
48  
49  
50  
51  
52  
53  
54  
55  
56  
57  
58  
59  
60

## Abstract

**Objectives** Few studies have explored correlations between metabolic syndrome (MetS) alterations and renal deterioration in longitudinal cohorts. We sought to address this knowledge gap by investigating associations between MetS recovery/development and rapid estimated glomerular filtration rate (eGFR) decline in the China Health and Retirement Longitudinal Study (CHARLS).

**Design** longitudinal cohort study.

**Setting** This study is a secondary analysis of CHARLS.

**Participants** We analyzed 4142 participants  $\geq$  45 years old from the CHARLS cohort.

**Results** According to baseline MetS status and follow-up, participants were divided into four groups: (1) 2460 (59.4%) in the MetS-free group, (2) 361 (8.7%) in the MetS-developed group, (3) 499 (12.0%) in the MetS recovery-group, and (4) 822 (19.8%) in the MetS-chronic group. When compared with the MetS-chronic group, the multivariable adjusted odds ratio (OR) of rapid eGFR decline in the MetS-recovery group was 0.64 (OR: 0.64; 95% confidence interval (CI): 0.45–0.90,  $P = 0.01$ ). In contrast, when compared with the MetS-free group, the multivariable adjusted OR of rapid eGFR decline in the MetS-developed group was 1.00 (OR: 1.00; 95% CI: 0.73–1.38,  $P = 0.98$ ). In addition, recovery from central obesity was associated with a reduced risk of rapid eGFR decline (OR: 0.31; 95% CI: 0.15–0.65,  $P < 0.01$ ).

**Conclusions** Over a 4-year follow-up period, we found that MetS recovery, including central obesity recovery, was associated with a reduced risk of rapid eGFR decline in middle-aged and older adults, while MetS occurrence was not related to rapid eGFR decline. Recovery from MetS appeared to protect against a rapid decline in eGFR. Further follow-up studies are required to identify the relationship between MetS alterations and adverse renal events.

## Strength and limitation of this study

This study investigated the association between altered metabolic syndrome

1  
2  
3  
4 status and rapid glomerular filtration rate decline in a nationwide cohort.

5 Metabolic syndrome scores were applied to evaluate the metabolic syndrome  
6 severity.  
7

8  
9 Blood tests related to metabolic syndrome and serum creatinine were performed  
10 only once.  
11

## 12 13 **Introduction**

14  
15 Metabolic Syndrome (MetS) is a cluster of clinical characteristics related to  
16 abdominal obesity, dyslipidemia, elevated blood glucose (BG), and elevated blood  
17 pressure (BP) (1-3). As of 2017, there were approximately 1 billion individuals with  
18 MetS around the world, of which China accounted for 21.7% (4). In China, MetS  
19 prevalence has been undergoing a steady increase, concomitant with an increasingly  
20 aged population, an obesity epidemic, and increased diabetes and hypertension levels,  
21 which collectively pose a considerable threat to people's health and impose a heavy  
22 burden on healthcare systems (4-6).  
23  
24  
25  
26  
27  
28  
29

30  
31 While investigations of causality relationships between MetS and cardiovascular  
32 events have gained considerable traction in recent years (7-9), MetS also impacts the  
33 kidneys. It is accepted that the pathological mechanisms underpinning MetS mainly  
34 include insulin resistance, increased oxidative stress, and a chronic inflammatory  
35 state, which may lead to kidney degeneration and chronic kidney disease (CKD)  
36 development (5, 6). Previously, it was confirmed that MetS and associated  
37 components (abdominal obesity, elevated BG, elevated BP, and lipid metabolic  
38 disorder) are strongly related to CKD and a decreased estimated glomerular filtration  
39 rate (eGFR) (10-14). Several longitudinal studies reported that MetS and its  
40 components were associated with incremental rapid eGFR decline and CKD incidence  
41 (15-18). However, these studies failed to articulate the relationship between MetS  
42 alterations and renal function changes. This dearth of information on this subject  
43 warrants further study, especially within a Chinese population context.  
44  
45  
46  
47  
48  
49  
50  
51  
52  
53  
54

55  
56 The China Health and Retirement Longitudinal Study (CHARLS) is a prospective  
57 cohort study conducted by the National School of Development, Peking University,  
58 China (19). The nationwide sample assesses the social, behavioral, and health status  
59  
60

1  
2  
3  
4 of individuals aged 45 and older (19). The CHARLS baseline survey was  
5 implemented in 2011 (Wave 1), and the samples were followed up every two years.  
6  
7 Blood samples from populations were only collected in 2011 (Wave1) and 2015  
8 (Wave 3). In the current study, we explored the relationship between MetS  
9 recovery/occurrence and rapid eGFR decline in middle-aged and older populations in  
10 the 4-year follow-up cohort.  
11  
12  
13  
14

## 15 **Methods**

### 16 **Study population**

17  
18 CHARLS is a nationally representative longitudinal survey on the social,  
19 economic, and health status of Chinese citizens aged  $\geq 45$  and their spouses in the  
20 community (19). In total, 17,708 participants were registered at baseline (Wave 1), of  
21 which 11,847 had blood sample tests.  
22  
23  
24  
25

26  
27 In this study, our exclusion criteria excluded participants with the following: 1)  
28 missing values; 2) without fasting blood values; 3) baseline eGFR  $< 60$   
29 ml/min/1.73m<sup>2</sup>; 4) clinician-reported malignant tumor, heart disease, stroke or kidney  
30 disease; 5)  $< 45$  years old; and 6) no follow-up records and related blood  
31 examinations in Wave 3. After applying these criteria, 4142 participants were finally  
32 included. The participant screening process is outlined (Fig. 1).  
33  
34  
35  
36  
37

38  
39 The Medical Ethics Review Committee of Peking University approved this study.  
40 All participants provided written informed consent before participating. This study is  
41 a secondary analysis of a public dataset and does not require ethics approval again.  
42  
43  
44

### 45 **Blood examinations**

46  
47 At baseline (Wave 1), blood measurements and hemoglobin were assayed by the  
48 Center for Disease Control and Prevention of the local county, whereas other  
49 biochemical indicators were analyzed by Youanmen Center for Clinical Laboratory of  
50 Capital Medical University, Beijing, China. Serum creatinine (Scr) was measured by  
51 the picric acid method; blood urea nitrogen (BUN) was determined by an enzymatic  
52 UV method with urease; blood glucose (BG), total cholesterol, high density  
53 lipoprotein (HDL) cholesterol, and triglyceride (TG) were assayed by enzymatic  
54 colorimetric tests; glycosylated hemoglobin (GHbA1c) was determined by high  
55  
56  
57  
58  
59  
60

performance liquid chromatography; high-sensitivity C-reactive protein (hs-CRP) was examined by immunoturbidimetric assay; and uric acid (UA) was determined by the UA plus method (20). Blood specimen testing in 2015 (Wave 3) was completed by KingMed Diagnostics, the leading third-party institution in China, which has testing laboratories in 27 provincial-level cities nationwide. GHbA1c, Scr, HDL, TG and BG were the required blood biomarkers from Wave 3. GHbA1c and Scr levels were determined by the same methods as Wave 1, while HDL was determined by a direct method, TG by an oxidase method, and BG by a hexokinase method (21). The collection, storage, transport, processing, and other blood sample details are described elsewhere (20, 21). Of note, the models and manufacturer information of blood test instruments in Wave 1 and Wave 3 were not available. All inspections and calibrations were performed by trained personnel.

### **Definition and grouping of MetS**

According to the 2018 Chinese Guidelines for Prevention and Treatment of Hypertension definition, MetS is diagnosed when three of the following four conditions are met: 1) Central obesity: waist circumference (WC)  $\geq 90$  cm in men and  $\geq 85$  cm in women; 2) Elevated BP: systolic blood pressure (SBP)  $\geq 130$  mmHg or diastolic blood pressure (DBP)  $\geq 85$  mmHg, or diagnosed as hypertension and treated; 3) Dyslipidemia: fasting TG  $\geq 150$  mg/dL, or HDL  $\leq 40$  mg/dL, or diagnosed as dyslipidemia and treated; and 4) Elevated BG: Fasting BG (FBG)  $\geq 100$  mg/dL, or 2 h postprandial BG  $\geq 100$  mg/dL, or diagnosed as diabetes and treated (2). Diabetes was defined as fasting BG  $\geq 126$  mg/dL, and/or HbA1c  $\geq 6.5\%$ , and/or a self-reported history of diabetes (22). Of note, we did not have 2 h postprandial BG data.

According to MetS baseline status and follow-up, participants were categorized into 1) MetS-free, 2) MetS-developed, 3) MetS-recovery, and 4) MetS-chronic groups.

### **MetS scores**

MetS severity potentially affects the recovery/occurrence of MetS. Thus, individuals with high MetS severity may be less liable to recover. Similarly, for those without MetS, it is not straightforward to progress to severe MetS. Therefore, MetS



1  
2  
3  
4 scores were introduced to assess MetS severity (23, 24). These scores were calculated  
5 using principal component (PC) analysis of WC, mean arterial pressure (MAP), FBG,  
6 fasting TG, and the inverse HDL values. All MetS related variables were normalized  
7 by 0–1. According to the PC analysis results, PC1 and PC2 explained 38.9% and  
8 20.9% of the variance, respectively. MetS scores were calculated as follows:  
9  
10  
11

$$12 \quad PC1 = 0.369 \times WC + 0.378 \times FBG + 0.585 \times TG + 0.562 \times \left(\frac{1}{HDL}\right) + 0.252 \times MAP,$$

$$13 \quad PC2 = 0.503 \times WC - 0.171 \times FBG - 0.268 \times TG - 0.274 \times \left(\frac{1}{HDL}\right) + 0.755 \times MAP,$$

$$14 \quad MetS \text{ score} = 0.389 \times PC1 + 0.209 \times PC2$$

### 15 **Study outcomes**

16 We calculated eGFR values using the 2012 Chronic Kidney Disease  
17 Epidemiology Collaboration equation based on creatinine levels (25). A rapid eGFR  
18 decline was defined as an average annual eGFR decline of  $> 3 \text{ ml/min/1.73m}^2$  (16,  
19 26). In this study, we defined a rapid eGFR decline as the eGFR in Wave 3 minus the  
20 eGFR in Wave 1,  $> 12 \text{ ml/min/1.73m}^2$ .  
21

### 22 **Covariate assessments**

23 Covariates included gender (male vs. female), age, marital status (married with  
24 spouse vs. others), education (illiterate, middle school and below, or high school and  
25 above), household per capita income, smoking (yes vs. no), drinking (yes vs. no),  
26 eGFR, grip strength, height, weight, body mass index (BMI), WC, SBP, DBP, MAP,  
27 depressive symptom (yes vs. no), episodic memory scores, self-reporting disease  
28 (hypertension, diabetes, and dyslipidemia), and corresponding medication. We  
29 categorized eGFR into two groups: 60–89 and  $\geq 90$ . Grip strength was divided into  
30 three groups (T1, T2, and T3) according to the one-third percentile. BMI was  
31 calculated by weight (kg)/height squared ( $\text{m}^2$ ). The BP of each participant was  
32 measured three times every 45–60 s with the Omron™ HEM-7112  
33 sphygmomanometer (Omron Co. LTD, Dalian, China) at rest. Both SBP and DBP  
34 were averaged from three measurements. MAP was defined as  $MAP = 1/3 \times SBP +$   
35  $2/3 \times DBP$ . Previous study demonstrated that depressive symptom was association  
36 with baseline eGFR (27). Thus, we should not overlook this variable. The 10-item  
37  
38  
39  
40  
41  
42  
43  
44  
45  
46  
47  
48  
49  
50  
51  
52  
53  
54  
55  
56  
57  
58  
59  
60

Center for Epidemiological Studies Depression Scale (CESD-10) was applied in the study (28). A CESD-10 score  $\geq 10$  was grouped into the depressive symptom group, and  $< 10$  into the non-depressive symptom group. Self-reporting disease was disease diagnosed by a doctor. Medical interventions included taking Chinese traditional and Western modern medicines.

### Statistical methods

The Kolmogorov-Smirnov test was used to test the normality of continuous variables. Continuous variables were expressed by the median (interquartile range) and categorical variables by frequency (%). The Mann-Whitney U test was performed on continuous variables, and categorical variables between the rapid eGFR decline group and the non-rapid eGFR decline group were tested by the Chi-square test. In preliminary analyses, variables with P values  $< 0.15$  were used to calibrate the logistic model. Continuous variables not presenting a linear relationship with the logit conversion value of the dependent variable were converted to categorical variables. Tolerance and variance inflation factors (VIFs) were used to test for collinearity. This existed if the tolerance was  $< 0.1$  or the VIF was  $> 10$ . Eventually, age, sex, BMI, Scr, hemoglobin, eGFR classification, grip strength classification and MetS scores were selected as confounding variables for model adjustments in this study. Most selected covariates have been reported to be related to renal events (23, 29-32). Logistic models were used to test the association between MetS recovery/occurrence and eGFR rapid decline after adjusting for multiple confounding factors. Furthermore, logistic models were used to explore the relationship between the recovery/occurrence of central obesity, elevated BP, elevated BG, dyslipidemia (elevated TG and decreased HDL), and the rapid decline of eGFR using different adjustments of confounding factors.  $P < 0.05$  was considered statistically significant (two-sided test). Statistics were generated in IBM SPSS 20.0 software (IBM Corp, Armonk, NY, USA) and StataMP 16 software (StataCorp, Texas, USA).

### Patient and public involvement

There were no participants involved in the development. The results of the survey are disseminated to the public through websites.

## Results

### Participant characteristics

As shown (Fig. 1), 4142 participants were selected, including 2460 (59.4%) in the MetS-free group, 361 (8.7%) in the MetS-developed group, 499 (12.0%) in the MetS recovery-group, and 822 (19.8%) in the MetS-chronic group.

Participant characteristics were grouped by the eGFR decline rate (Table 1). A rapid decline in eGFR developed in 711 (17.2%) participants during the 4-year follow-up. The median age was 58 (52–64) years and males accounted for 42.5% at baseline. In contrast to rapid eGFR decline group, the non-rapid eGFR decline group was significantly higher with respect to FBG, Scr, hemoglobin, eGFR, weight, BMI, WC, MetS scores, central obesity, and elevated BG (all  $P < 0.05$ ). Those in non-rapid eGFR decline group were more likely to be female and younger when compared with the eGFR decline group (both  $P < 0.05$ ).

### Rapid eGFR decline risk based on MetS recovery or occurrence

As shown (Table 2), after adjustment for age, sex, BMI, Scr, hemoglobin, eGFR classification, grip strength classification, and MetS scores, the odds ratio (OR) of rapid eGFR decline in the MetS-recovery group was 0.64 (OR: 0.64; 95% CI: 0.45–0.90,  $P = 0.01$ ) when compared with the MetS-chronic group. In contrast, after adjustment for age, sex, BMI, serum creatinine, hemoglobin, eGFR classification, grip strength classification, and MetS score, the OR of rapid eGFR decline in the MetS-developed group was 1.00 (OR: 1.00; 95% CI: 0.73–1.38,  $P = 0.98$ ) when compared with the MetS-free group.

### MetS components and rapid eGFR decline risk

The association of changes in the composition of MetS groups with rapid eGFR decline is shown (Table 3). In the baseline MetS population, after adjustment for age, sex, BMI, serum creatinine, hemoglobin, eGFR classification, grip strength classification, and MetS score, the OR of rapid eGFR decline in the population recovered from central obesity was 0.31 (OR: 0.31; 95% CI: 0.15–0.65,  $P < 0.01$ ) when compared with chronic central obesity, whereas recovery from elevated BP, dyslipidemia, and elevated BG did not show statistically significant differences when

1  
2  
3  
4 compared with the corresponding population (all  $P > 0.05$ ). In the baseline population  
5  
6 without MetS, we observed no statistical difference in the rapid decline of eGFR  
7  
8 between the occurrence of all MetS component groups and corresponding contrast  
9  
10 groups (all  $P > 0.05$ ). This was consistent with the overall trend.

## 11 **Discussion**

12  
13 We examined the relationship between MetS changes and rapid eGFR decline in  
14  
15 a large nationwide cohort. At the 4-year follow-up, MetS recovery was significantly  
16  
17 associated with a reduced risk of rapid eGFR decline in the middle-aged and elderly,  
18  
19 with only WC recovery consistent with the overall trend. The occurrence of MetS and  
20  
21 its components did not significantly increase the risk of rapid eGFR decline. Further  
22  
23 follow-up is required to elucidate the relationship between MetS dynamics and the  
24  
25 rapid decline in eGFR.

26  
27 Longitudinal cohort studies in several Asian countries concluded that MetS  
28  
29 increased the risk of CKD, although follow-up times varied from study to study  
30  
31 (15-18, 33). However, the effect of MetS on the rapid decline of eGFR remains  
32  
33 controversial. In a 3-year cohort, Cheng *et al.* found no significant correlations  
34  
35 between MetS and eGFR rapid decline in the elderly (33). However, other studies  
36  
37 reported that MetS was associated with a decline in eGFR and even acted as an  
38  
39 independent predictor of eGFR decline (16-18). We noted that none of the  
40  
41 aforementioned studies accounted for the MetS status of participants during follow-up  
42  
43 periods. Park *et al.* explored the relationship between MetS status change and CKD  
44  
45 events and concluded that MetS recovery was associated with a decreased risk of  
46  
47 CKD incidence, but the occurrence of MetS increased the risk of CKD incidence (34).  
48  
49 Park *et al.* did not discuss the association with the rapid eGFR decline. In this study,  
50  
51 we concluded that MetS recovery was associated with a reduced risk of rapid eGFR  
52  
53 decline, while MetS occurrence was not related to rapid eGFR decline. Studies  
54  
55 exploring the relationship between MetS dynamic changes and the rapid decline of  
56  
57 eGFR in the Chinese population are rare. Our investigation of the relationship  
58  
59 between MetS recovery/occurrence and eGFR rapid decline in a large nationwide  
60  
61 cohort may support renal function management in individuals with MetS.

1  
2  
3  
4 The effect of MetS on renal function is complex, thus, no definitive mechanisms  
5 can explain our study observations. The evidence suggests that every component of  
6 MetS is associated with adverse renal events (10-14). It is accepted that hypertension  
7 and diabetes play pivotal roles in CKD development and progression (35-37). Also,  
8 lipid metabolism dysregulation and abnormal lipid distribution can lead to  
9 lipotoxicity-related renal damage (38, 39). Thus, MetS may result from the combined  
10 effects of central obesity, increased BP, insulin resistance, and blood lipid disorder,  
11 leading to physiopathological lipotoxicity, oxidative stress increments, endothelial  
12 dysfunction, elevated inflammation, and apoptosis, which would contribute to kidney  
13 dysfunction (5, 38). However, the relationship between MetS components and the  
14 weight of each factor on kidney injury remain unclear.

15  
16  
17  
18  
19  
20  
21  
22  
23  
24  
25 Our study had some limitations. Firstly, MetS diagnoses were not  
26 comprehensively checked (using multiple tests). Secondly, CKD occurrence was not  
27 included as a study outcome. Also, urine test results were unavailable for this cohort,  
28 thus, we may have underestimated the CKD incidence. Thirdly, blood analyses from  
29 Wave 1 and Wave 3 were performed at a different testing center, with inconsistent  
30 HDL, TG, and BG measurement methods, therefore, measurement errors may have  
31 occurred. Fourthly, a large proportion of individuals with missing values were  
32 excluded and this may have biased some of our results.

### 33 34 35 36 37 38 39 40 41 **Conclusions**

42 Over a 4-year follow-up, we observed that MetS recovery, including recovery of  
43 central obesity, was associated with a reduced risk of rapid eGFR decline in  
44 middle-aged and older adults, while MetS occurrence was not related to rapid eGFR  
45 decline. Further follow-up studies are required to observe the relationship between  
46 MetS alterations and adverse renal events.

47  
48  
49  
50  
51  
52  
53 **Acknowledgements** The authors are grateful to the China Health and Retirement  
54 Longitudinal Study (CHARLS) team for providing the data.

55  
56  
57  
58  
59  
60 **Contributors** PL, LT and JF—analysis and interpretation of data and preparation of  
the manuscript. XL—study concept and design, and preparation and critical review of

1  
2  
3  
4 the manuscript. All authors have approved the final manuscript.  
5

6 **Funding** This work was supported by Guangzhou Municipal Science and Technology  
7 Bureau (202002020047).  
8  
9

10 **Competing interests** All authors declared no competing interests.  
11

12 **Data availability statement** CHARLS data of the study will be available to  
13 investigators at the CHARLS website (<http://charls.pku.edu.cn/en>).  
14  
15

## 16 **References**

- 17 1. Alberti KG, Zimmet P, Shaw J. The metabolic syndrome--a new worldwide definition. *Lancet*  
18 (London, England). 2005;366(9491):1059-62.
- 19 2. 2018 Chinese Guidelines for Prevention and Treatment of Hypertension-A report of the Revision  
20 Committee of Chinese Guidelines for Prevention and Treatment of Hypertension. *Journal of geriatric*  
21 *cardiology : JGC*. 2019;16(3):182-241.
- 22 3. Huang PL. A comprehensive definition for metabolic syndrome. *Disease models & mechanisms*.  
23 2009;2(5-6):231-7.
- 24 4. Saklayen MG. The Global Epidemic of the Metabolic Syndrome. *Current hypertension reports*.  
25 2018;20(2):12.
- 26 5. McCracken E, Monaghan M, Sreenivasan S. Pathophysiology of the metabolic syndrome. *Clinics*  
27 *in dermatology*. 2018;36(1):14-20.
- 28 6. Zhang X, Lerman LO. The metabolic syndrome and chronic kidney disease. *Translational*  
29 *research : the journal of laboratory and clinical medicine*. 2017;183:14-25.
- 30 7. Lee EY, Han K, Kim DH, Park YM, Kwon HS, Yoon KH, et al. Exposure-weighted scoring for  
31 metabolic syndrome and the risk of myocardial infarction and stroke: a nationwide population-based  
32 study. *Cardiovascular diabetology*. 2020;19(1):153.
- 33 8. Guembe MJ, Fernandez-Lazaro CI, Sayon-Orea C, Toledo E, Moreno-Iribas C. Risk for  
34 cardiovascular disease associated with metabolic syndrome and its components: a 13-year  
35 prospective study in the RIVANA cohort. *Cardiovascular diabetology*. 2020;19(1):195.
- 36 9. Hoang K, Zhao Y, Gardin JM, Carnethon M, Mukamal K, Yanez D, et al. LV Mass as a Predictor of  
37 CVD Events in Older Adults With and Without Metabolic Syndrome and Diabetes. *JACC Cardiovascular*  
38 *imaging*. 2015;8(9):1007-15.
- 39 10. Xie K, Bao L, Jiang X, Ye Z, Bing J, Dong Y, et al. The association of metabolic syndrome  
40 components and chronic kidney disease in patients with hypertension. *Lipids Health Dis*.  
41 2019;18(1):229.
- 42 11. Viazzi F, Piscitelli P, Giorda C, Ceriello A, Genovese S, Russo G, et al. Metabolic syndrome, serum  
43 uric acid and renal risk in patients with T2D. *PloS one*. 2017;12(4):e0176058.
- 44 12. Chen J, Kong X, Jia X, Li W, Wang Z, Cui M, et al. Association between metabolic syndrome and  
45 chronic kidney disease in a Chinese urban population. *Clin Chim Acta*. 2017;470:103-8.
- 46 13. Thomas G, Sehgal AR, Kashyap SR, Srinivas TR, Kirwan JP, Navaneethan SD. Metabolic syndrome  
47 and kidney disease: a systematic review and meta-analysis. *Clinical journal of the American Society of*  
48 *Nephrology : CJASN*. 2011;6(10):2364-73.
- 49 14. Chang IH, Han JH, Myung SC, Kwak KW, Kim TH, Park SW, et al. Association between metabolic  
50  
51  
52  
53  
54  
55  
56  
57  
58  
59  
60

1  
2  
3 syndrome and chronic kidney disease in the Korean population. *Nephrology (Carlton, Vic)*.  
4 2009;14(3):321-6.

5  
6 15. Hu Y, Shi LX, Zhang Q, Peng NC. Increased Risk of Chronic Kidney Diseases in Patients with  
7 Metabolic Syndrome: A 3-year Prospective Cohort Study. *Current medical science*. 2019;39(2):204-10.

8  
9 16. Huh JH, Yadav D, Kim JS, Son JW, Choi E, Kim SH, et al. An association of metabolic syndrome and  
10 chronic kidney disease from a 10-year prospective cohort study. *Metabolism: clinical and*  
11 *experimental*. 2017;67:54-61.

12  
13 17. Hayashi K, Takayama M, Abe T, Kanda T, Hirose H, Shimizu-Hirota R, et al. Investigation of  
14 Metabolic Factors Associated with eGFR Decline Over 1 Year in a Japanese Population without CKD.  
15 *Journal of atherosclerosis and thrombosis*. 2017;24(8):863-75.

16  
17 18. Kawamoto R, Akase T, Ninomiya D, Kumagi T, Kikuchi A. Metabolic syndrome is a predictor of  
18 decreased renal function among community-dwelling middle-aged and elderly Japanese. *International*  
19 *urology and nephrology*. 2019;51(12):2285-94.

20  
21 19. Zhao Y, Hu Y, Smith JP, Strauss J, Yang G. Cohort profile: the China Health and Retirement  
22 Longitudinal Study (CHARLS). *Int J Epidemiol*. 2014;43(1):61-8.

23  
24 20. Zhao Y, Crimmins E, Hu P, Hu Y, Ge T, Kim J, et al. ChinaHealth and Retirement Longitudinal  
25 Study: 2011–2012 National BaselineUsers' Guide. Beijing, China: National School of Development,  
26 Peking University. 2013.

27  
28 21. Chen X, Crimmins E, Hu PP, Kim JK, Meng Q, Strauss J, et al. Venous Blood-Based Biomarkers in  
29 the China Health and Retirement Longitudinal Study: Rationale, Design, and Results From the 2015  
30 Wave. *American journal of epidemiology*. 2019;188(11):1871-7.

31  
32 22. Classification and Diagnosis of Diabetes: Standards of Medical Care in Diabetes-2021. *Diabetes*  
33 *Care*. 2021;44(Suppl 1):S15-s33.

34  
35 23. Wu M, Shu Y, Wang L, Song L, Chen S, Liu Y, et al. Metabolic syndrome severity score and the  
36 progression of CKD. *European journal of clinical investigation*. 2021:e13646.

37  
38 24. Wijndaele K, Beunen G, Duvigneaud N, Matton L, Duquet W, Thomis M, et al. A continuous  
39 metabolic syndrome risk score: utility for epidemiological analyses. *Diabetes Care*. 2006;29(10):2329.

40  
41 25. Inker LA, Schmid CH, Tighiouart H, Eckfeldt JH, Feldman HI, Greene T, et al. Estimating  
42 glomerular filtration rate from serum creatinine and cystatin C. *The New England journal of medicine*.  
43 2012;367(1):20-9.

44  
45 26. Lindeman RD, Tobin J, Shock NW. Longitudinal studies on the rate of decline in renal function  
46 with age. *Journal of the American Geriatrics Society*. 1985;33(4):278-85.

47  
48 27. Jia F, Li X, Liu F, Shi X, Liu H, Cao F. Association of renal function and depressive symptoms:  
49 Evidence from the China health and retirement longitudinal study. *Journal of psychosomatic research*.  
50 2020;137:110224.

51  
52 28. Irwin M, Artin KH, Oxman MN. Screening for depression in the older adult: criterion validity of  
53 the 10-item Center for Epidemiological Studies Depression Scale (CES-D). *Archives of internal*  
54 *medicine*. 1999;159(15):1701-4.

55  
56 29. Ma X, Zhang C, Su H, Gong X, Kong X. Increasing Body Mass Index Predicts Rapid Decline in Renal  
57 Function: A 5 Year Retrospective Study. *Hormone and metabolic research = Hormon- und*  
58 *Stoffwechselforschung = Hormones et métabolisme*. 2018;50(7):556-61.

59  
60 30. Meguro S, Tomita M, Kabeya Y, Katsuki T, Oikawa Y, Shimada A, et al. Factors Associated with  
the Decline of Kidney Function Differ among eGFR Strata in Subjects with Type 2 Diabetes Mellitus.  
*International journal of endocrinology*. 2012;2012:687867.

31. Deicher R, Hörl WH. Anaemia as a risk factor for the progression of chronic kidney disease. *Current opinion in nephrology and hypertension*. 2003;12(2):139-43.
32. Young BA, Katz R, Boulware LE, Kestenbaum B, de Boer IH, Wang W, et al. Risk Factors for Rapid Kidney Function Decline Among African Americans: The Jackson Heart Study (JHS). *Am J Kidney Dis*. 2016;68(2):229-39.
33. Cheng HT, Huang JW, Chiang CK, Yen CJ, Hung KY, Wu KD. Metabolic syndrome and insulin resistance as risk factors for development of chronic kidney disease and rapid decline in renal function in elderly. *The Journal of clinical endocrinology and metabolism*. 2012;97(4):1268-76.
34. Park S, Lee S, Kim Y, Lee Y, Kang MW, Han K, et al. Reduced risk for chronic kidney disease after recovery from metabolic syndrome: A nationwide population-based study. *Kidney research and clinical practice*. 2020;39(2):180-91.
35. Webster AC, Nagler EV, Morton RL, Masson P. Chronic Kidney Disease. *Lancet (London, England)*. 2017;389(10075):1238-52.
36. Tonneijck L, Muskiet MH, Smits MM, van Bommel EJ, Heerspink HJ, van Raalte DH, et al. Glomerular Hyperfiltration in Diabetes: Mechanisms, Clinical Significance, and Treatment. *J Am Soc Nephrol*. 2017;28(4):1023-39.
37. Ruiz-Ortega M, Rayego-Mateos S, Lamas S, Ortiz A, Rodrigues-Diez RR. Targeting the progression of chronic kidney disease. *Nature reviews Nephrology*. 2020;16(5):269-88.
38. Kim Y, Park CW. Can management of the components of metabolic syndrome modify the course of chronic kidney disease? *Kidney research and clinical practice*. 2020;39(2):118-20.
39. D'Agati VD, Chagnac A, de Vries AP, Levi M, Porrini E, Herman-Edelstein M, et al. Obesity-related glomerulopathy: clinical and pathologic characteristics and pathogenesis. *Nature reviews Nephrology*. 2016;12(8):453-71.

**Table 1. Baseline characteristics of participants between rapid eGFR decline group and non-rapid eGFR decline group**

| Characteristics                    | Overall<br>(n = 4142) | Rapid eGFR decline<br>(n = 711) | Non-rapid eGFR decline<br>(n = 3431) | P value |
|------------------------------------|-----------------------|---------------------------------|--------------------------------------|---------|
| Male [n (%)]                       | 1874 (45.2)           | 351 (49.4)                      | 1523 (44.4)                          | 0.02    |
| Age (years)                        | 58 (52~64)            | 59 (52~66)                      | 58 (52~64)                           | 0.02    |
| Married with spouse [n (%)]        | 3548 (87.5)           | 610 (85.8)                      | 2938 (85.6)                          | 0.91    |
| Education                          |                       |                                 |                                      |         |
| Illiterate [n (%)]                 | 1206 (29.1)           | 191 (26.9)                      | 1015 (29.6)                          |         |
| Middle school and below [n (%)]    | 1770 (41.2)           | 309 (43.5)                      | 1398 (40.7)                          | 0.28    |
| High school and above [n (%)]      | 1229 (29.7)           | 211 (29.7)                      | 1018 (29.7)                          |         |
| Household per capita income (yuan) | 6461.0                | 6000.0                          | 6560.0                               | 0.20    |
| M (P25~P75)                        | (2336.7~13487.5)      | (1866.7~13490.0)                | (2450.0~13486.7)                     |         |
| Drink [n (%)]                      | 1470 (32.2)           | 234 (32.9)                      | 1173 (34.2)                          | 0.51    |
| Smoke [n (%)]                      | 1567 (37.8)           | 272 (38.3)                      | 1295 (37.7)                          | 0.80    |
| Blood urea nitrogen (mg/dl)        | 15.0 (12.5~17.8)      | 15.1 (12.6~18.2)                | 15.0 (12.5~17.7)                     | 0.18    |
| Fasting glucose (mg/dl)            | 102.4 (94.9~111.2)    | 100.6 (93.4~109.8)              | 102.4 (95.2~111.4)                   | 0.001   |
| Creatinine (mg/dl)                 | 0.7 (0.6~0.8)         | 0.7 (0.6~0.8)                   | 0.8 (0.6~0.9)                        | <0.001  |
| Total cholesterol (mg/dl)          | 190.6 (168.6~215.8)   | 189.8 (164.7~215.3)             | 190.6 (169.3~216.1)                  | 0.20    |
| Triglyceride (mg/dl)               | 105.3 (74.3~148.7)    | 101.8 (71.7~146)                | 106.2 (74.3~148.7)                   | 0.23    |



|    |                                                 |                     |                     |                     |        |
|----|-------------------------------------------------|---------------------|---------------------|---------------------|--------|
| 1  |                                                 |                     |                     |                     |        |
| 2  |                                                 |                     |                     |                     |        |
| 3  | HDL cholesterol (mg/dl)                         | 49.1 (41.0~59.5)    | 49.5 (41.0~59.9)    | 49.1 (41.0~59.5)    | 0.81   |
| 4  | hs-CRP (mg/l)                                   | 1.0 (0.5~2.0)       | 1.0 (0.6~2)         | 1.0 (0.5~2.0)       | 0.43   |
| 5  | GHbA1c (%)                                      | 5.1 (4.9~5.4)       | 5.1 (4.9~5.4)       | 5.1 (4.9~5.4)       | 0.36   |
| 6  | Uric acid (mg/dl)                               | 4.2 (3.5~5.0)       | 4.2 (3.5~5.0)       | 4.2 (3.5~5.0)       | 0.83   |
| 7  | Hemoglobin (mg/dl)                              | 14.2 (13.1~15.5)    | 14.0 (12.8~15.1)    | 14.3 (13.1~15.5)    | <0.001 |
| 8  | eGFR (ml/min/1.73m <sup>2</sup> )               | 95.9 (86.4~102.9)   | 97.0 (88.3~106.1)   | 95.6 (85.9~102.4)   | <0.001 |
| 9  | eGFR group                                      |                     |                     |                     |        |
| 10 | 60~89 ml/min/1.73m <sup>2</sup> [ <i>n</i> (%)] | 1368 (33.0)         | 209 (29.4)          | 1158 (33.8)         | 0.02   |
| 11 | 90~ ml/min/1.73m <sup>2</sup> [ <i>n</i> (%)]   | 2774 (67.0)         | 502 (70.6)          | 2272 (66.2)         |        |
| 12 | Grip strength (kg)                              | 29.3 (23.8~36.5)    | 29.5 (24.9~36.2)    | 29.3 (23.5~36.7)    | 0.13   |
| 13 | Grip strength group                             |                     |                     |                     |        |
| 14 | T1 [ <i>n</i> (%)]                              | 1386 (33.5)         | 209 (29.4)          | 1177 (34.3)         | 0.01   |
| 15 | T2 [ <i>n</i> (%)]                              | 1387 (33.5)         | 268 (37.7)          | 1199 (32.6)         |        |
| 16 | T3 [ <i>n</i> (%)]                              | 1369 (33.1)         | 234 (32.9)          | 1135 (33.1)         |        |
| 17 | Height (cm)                                     | 157.7 (152.0~163.8) | 157.9 (152.0~163.7) | 157.6 (152.0~163.9) | 0.64   |
| 18 | Weight (kg)                                     | 58 (51.3~65.5)      | 57.1 (50.8~65.1)    | 58.2 (51.4~65.7)    | 0.08   |
| 19 | Body mass index (kg/m <sup>2</sup> )            | 23.2 (21~25.7)      | 22.9 (20.8~25.4)    | 23.3 (21.1~25.8)    | 0.01   |
| 20 | Waist circumference (cm)                        | 84.4 (78.0~92.0)    | 83.6 (77.0~90.2)    | 84.8 (78.1~92.0)    | <0.01  |
| 21 | Systolic blood pressure (mmHg)                  | 127 (114~141)       | 128 (114~142)       | 127 (114~141)       | 0.72   |
| 22 | Diastolic blood pressure (mmHg)                 | 75 (67~83)          | 74 (66~83)          | 75 (67~83)          | 0.41   |
| 23 | Mean arterial pressure (mmHg)                   | 92 (83~102)         | 92 (83~103)         | 92 (84~102)         | 0.76   |
| 24 | Depression symptom [ <i>n</i> (%)]              | 1904 (46.0)         | 319 (44.9)          | 1585 (46.2)         | 0.52   |
| 25 | Self-report hypertension [ <i>n</i> (%)]        | 887 (21.4)          | 157 (22.1)          | 730 (21.3)          | 0.63   |
| 26 | Self-report dyslipidemia [ <i>n</i> (%)]        | 333 (8.0)           | 58 (8.2)            | 275 (8.0)           | 0.90   |
| 27 | Self-report diabetes or HbG [ <i>n</i> (%)]     | 191 (4.6)           | 28 (3.9)            | 163 (4.8)           | 0.35   |
| 28 | Antihypertensive therapy [ <i>n</i> (%)]        | 664 (16.0)          | 119 (16.7)          | 545 (19.5)          | 0.57   |
| 29 | Lipid-lowering therapy [ <i>n</i> (%)]          | 187 (4.5)           | 37 (5.2)            | 150 (4.4)           | 0.33   |
| 30 | Hypoglycemic therapy [ <i>n</i> (%)]            | 127 (3.1)           | 19 (2.7)            | 108 (3.1)           | 0.50   |
| 31 | Metabolic syndrome [ <i>n</i> (%)]              | 1321 (31.9)         | 207 (29.1)          | 1114 (32.5)         | 0.08   |
| 32 | MetS scores                                     | -0.1 (-0.4~0.3)     | -0.1 (-0.5~0.3)     | 0 (-0.4~0.3)        | 0.02   |
| 33 | Metabolic syndrome components                   |                     |                     |                     |        |
| 34 | Central obesity [ <i>n</i> (%)]                 | 1726 (41.7)         | 264 (37.1)          | 1462 (42.6)         | <0.01  |
| 35 | Elevated blood pressure [ <i>n</i> (%)]         | 2099 (50.7)         | 368 (51.8)          | 1731 (50.5)         | 0.52   |
| 36 | Dyslipidemia [ <i>n</i> (%)]                    | 1595 (38.5)         | 278 (39.1)          | 1317 (38.4)         | 0.72   |
| 37 | Elevated blood glucose [ <i>n</i> (%)]          | 2456 (59.3)         | 383 (53.9)          | 2073 (60.4)         | <0.01  |
| 38 | Baseline non-MetS group                         |                     |                     |                     |        |
| 39 | MetS-free [ <i>n</i> (%)]                       | 2460 (59.4)         | 444 (62.4)          | 2016 (58.8)         |        |
| 40 | MetS-developed [ <i>n</i> (%)]                  | 361 (8.7)           | 60 (8.4)            | 301 (8.8)           |        |
| 41 | Baseline Mets group                             |                     |                     |                     |        |
| 42 | MetS-recovery [ <i>n</i> (%)]                   | 499 (12.0)          | 64 (9.0)            | 435 (12.7)          |        |
| 43 | MetS-chronic [ <i>n</i> (%)]                    | 822 (19.8)          | 143 (20.1)          | 679 (19.8)          |        |
| 44 |                                                 |                     |                     |                     |        |
| 45 |                                                 |                     |                     |                     |        |
| 46 |                                                 |                     |                     |                     |        |
| 47 |                                                 |                     |                     |                     |        |
| 48 |                                                 |                     |                     |                     |        |
| 49 |                                                 |                     |                     |                     |        |
| 50 |                                                 |                     |                     |                     |        |
| 51 |                                                 |                     |                     |                     |        |
| 52 |                                                 |                     |                     |                     |        |
| 53 |                                                 |                     |                     |                     |        |
| 54 |                                                 |                     |                     |                     |        |
| 55 |                                                 |                     |                     |                     |        |
| 56 |                                                 |                     |                     |                     |        |
| 57 |                                                 |                     |                     |                     |        |
| 58 |                                                 |                     |                     |                     |        |
| 59 |                                                 |                     |                     |                     |        |
| 60 |                                                 |                     |                     |                     |        |

Data are *n* (%) or median (interquartile range); HDL: high density lipoprotein; LDL: low density lipoprotein; hs-CRP: high-sensitivity C-reactive protein; eGFR: estimated glomerular filtration rate; HBG: high blood glucose; MetS: metabolic syndrome; grip strength is divided into T1, T2 and T3 groups by one-third percentile.

**Table 2. Multivariate logistic regression of rapid eGFR decline between study groups**

|                          | Model 1                 |                | Model 2                 |                |
|--------------------------|-------------------------|----------------|-------------------------|----------------|
|                          | Adjusted OR<br>(95% CI) | <i>P</i> value | Adjusted OR<br>(95% CI) | <i>P</i> value |
| Baseline MetS groups     |                         |                |                         |                |
| MetS-chronic             | ref                     |                | ref                     |                |
| MetS-recovery            | 0.68 (0.50-0.95)        | 0.02           | 0.64 (0.45-0.90)        | 0.01           |
| Baseline non-MetS groups |                         |                |                         |                |
| MetS-free                | ref                     |                | ref                     |                |
| MetS-developed           | 0.93 (0.69-1.25)        | 0.64           | 1.00 (0.73-1.38)        | 0.98           |

Model 1: additional adjusted for age and sex.

Model 2: additional adjusted for age, sex, serum creatinine, eGFR classification, grip strength classification; hemoglobin; MetS scores and body mass index.

eGFR: estimated glomerular filtration rate; CI: confidence interval; OR: odds ratio; MetS: metabolic syndrome.

**Table 3. Multivariate logistic regression of rapid eGFR decline between study groups according the changes of MetS components**

|                                                                                      | Model 1                 |                | Model 2                 |                |
|--------------------------------------------------------------------------------------|-------------------------|----------------|-------------------------|----------------|
|                                                                                      | Adjusted OR<br>(95% CI) | <i>P</i> value | Adjusted OR<br>(95% CI) | <i>P</i> value |
| Recovered components in baseline MetS groups (chronic MetS components as reference)  |                         |                |                         |                |
| Central obesity                                                                      | 0.29 (0.15-0.59)        | 0.01           | 0.31 (0.15-0.65)        | <0.01          |
| Elevated blood pressure                                                              | 0.80 (0.50-1.26)        | 0.33           | 0.79 (0.49-1.27)        | 0.33           |
| Elevated SBP                                                                         | 0.89 (0.61-1.31)        | 0.56           | 0.88 (0.59-1.30)        | 0.51           |
| Elevated DBP                                                                         | 0.75 (0.46-1.23)        | 0.26           | 0.68 (0.41-1.15)        | 0.15           |
| Dyslipidemia                                                                         | 1.09 (0.82-1.44)        | 0.57           | 1.05 (0.78-1.40)        | 0.77           |
| Elevated TG                                                                          | 1.22 (0.87-1.72)        | 0.26           | 1.14 (0.79-1.36)        | 0.50           |
| Decreased HDL                                                                        | 0.84 (0.59-1.12)        | 0.32           | 0.85 (0.59-1.22)        | 0.38           |
| Elevated blood glucose                                                               | 1.08 (0.87-1.34)        | 0.49           | 1.08 (0.86-1.36)        | 0.52           |
| Elevated fasting glucose                                                             | 1.14 (0.91-1.43)        | 0.25           | 1.13 (0.89-1.43)        | 0.32           |
| Developed components in baseline non-MetS groups (free MetS components as reference) |                         |                |                         |                |
| Central obesity                                                                      | 1.21 (0.92-1.59)        | 0.16           | 1.32 (0.97-1.77)        | 0.74           |
| Elevated blood pressure                                                              | 0.84 (0.63-1.13)        | 0.26           | 0.87 (0.64-1.18)        | 0.37           |
| Elevated SBP                                                                         | 0.88 (0.66-1.17)        | 0.37           | 0.92 (0.68-1.23)        | 0.56           |
| Elevated DBP                                                                         | 0.88 (0.62-1.24)        | 0.46           | 0.91 (0.63-1.30)        | 0.59           |
| Dyslipidemia                                                                         | 0.92 (0.69-1.22)        | 0.54           | 0.96 (0.72-1.30)        | 0.81           |
| Elevated TG                                                                          | 0.93 (0.70-1.25)        | 0.64           | 1.02 (0.75-1.37)        | 0.91           |
| Decreased HDL                                                                        | 1.02 (0.65-1.59)        | 0.95           | 0.97 (0.61-1.55)        | 0.91           |
| Elevated blood glucose                                                               | 1.07 (0.76-1.50)        | 0.71           | 1.07 (0.75-1.52)        | 0.71           |
| Elevated fasting glucose                                                             | 1.06 (0.74-1.51)        | 0.76           | 1.09 (0.76-1.57)        | 0.64           |

1  
2  
3  
4  
5  
6  
7  
8  
9  
10  
11  
12  
13  
14  
15  
16  
17  
18  
19  
20  
21  
22  
23  
24  
25  
26  
27  
28  
29  
30  
31  
32  
33  
34  
35  
36  
37  
38  
39  
40  
41  
42  
43  
44  
45  
46  
47  
48  
49  
50  
51  
52  
53  
54  
55  
56  
57  
58  
59  
60

---

Model 1: additional adjusted for age and sex.

Model 2: additional adjusted for age, sex, serum creatinine, eGFR classification, grip strength classification; hemoglobin; MetS score and body mass index.

eGFR: estimated glomerular filtration rate; CI: confidence interval; OR: odds ratio; MetS: metabolic syndrome; SBP: systolic blood pressure; DBP: diastolic blood pressure; TG: triglyceride; HDL: high density lipoprotein.

For peer review only

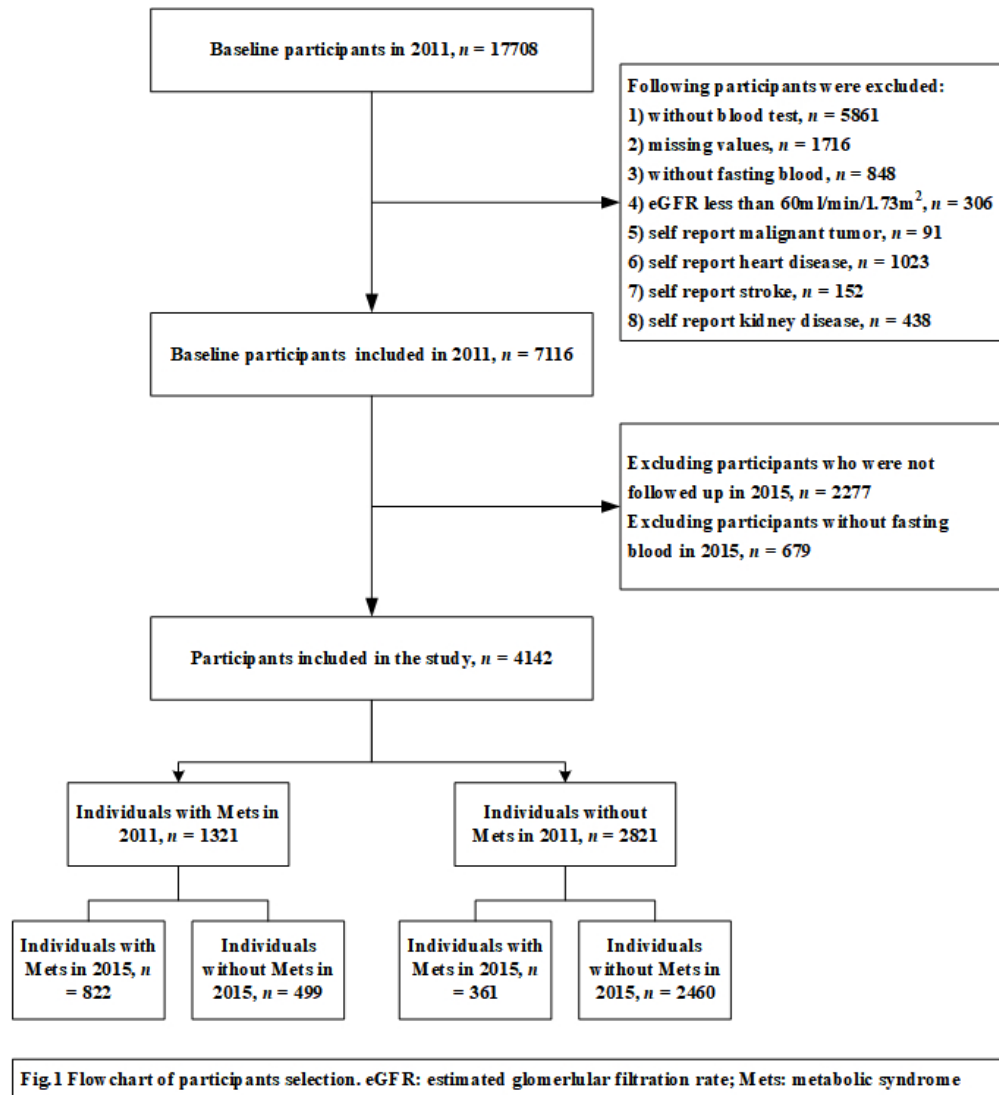

flowchart of participants selection

180x197mm (96 x 96 DPI)

# BMJ Open

## Association between recovery/occurrence of metabolic syndrome and rapid estimated glomerular filtration rate decline in middle-aged and older populations: evidence from the China Health and Retirement Longitudinal Study

|                                 |                                                                                                                                                                                                                                                                                                                                                                                                                           |
|---------------------------------|---------------------------------------------------------------------------------------------------------------------------------------------------------------------------------------------------------------------------------------------------------------------------------------------------------------------------------------------------------------------------------------------------------------------------|
| Journal:                        | <i>BMJ Open</i>                                                                                                                                                                                                                                                                                                                                                                                                           |
| Manuscript ID                   | bmjopen-2021-059504.R1                                                                                                                                                                                                                                                                                                                                                                                                    |
| Article Type:                   | Original research                                                                                                                                                                                                                                                                                                                                                                                                         |
| Date Submitted by the Author:   | 20-Apr-2022                                                                                                                                                                                                                                                                                                                                                                                                               |
| Complete List of Authors:       | Liu, Peijia; Third Affiliated Hospital of Sun Yat-Sen University, Tang, Leile; Third Affiliated Hospital of Sun Yat-Sen University, Department of Cardiology<br>Fang, Jia; Third Affiliated Hospital of Sun Yat-Sen University, Department of Nephrology<br>Chen, Chaojin; Third Affiliated Hospital of Sun Yat-Sen University<br>Liu, Xun; Third Affiliated Hospital of Sun Yat-Sen University, Department of Nephrology |
| <b>Primary Subject Heading</b>: | Nutrition and metabolism                                                                                                                                                                                                                                                                                                                                                                                                  |
| Secondary Subject Heading:      | Urology, Diabetes and endocrinology, Public health                                                                                                                                                                                                                                                                                                                                                                        |
| Keywords:                       | Chronic renal failure < NEPHROLOGY, Lipid disorders < DIABETES & ENDOCRINOLOGY, PUBLIC HEALTH                                                                                                                                                                                                                                                                                                                             |
|                                 |                                                                                                                                                                                                                                                                                                                                                                                                                           |

SCHOLARONE™  
Manuscripts

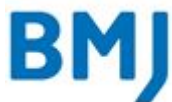

I, the Submitting Author has the right to grant and does grant on behalf of all authors of the Work (as defined in the below author licence), an exclusive licence and/or a non-exclusive licence for contributions from authors who are: i) UK Crown employees; ii) where BMJ has agreed a CC-BY licence shall apply, and/or iii) in accordance with the terms applicable for US Federal Government officers or employees acting as part of their official duties; on a worldwide, perpetual, irrevocable, royalty-free basis to BMJ Publishing Group Ltd ("BMJ") its licensees and where the relevant Journal is co-owned by BMJ to the co-owners of the Journal, to publish the Work in this journal and any other BMJ products and to exploit all rights, as set out in our [licence](#).

The Submitting Author accepts and understands that any supply made under these terms is made by BMJ to the Submitting Author unless you are acting as an employee on behalf of your employer or a postgraduate student of an affiliated institution which is paying any applicable article publishing charge ("APC") for Open Access articles. Where the Submitting Author wishes to make the Work available on an Open Access basis (and intends to pay the relevant APC), the terms of reuse of such Open Access shall be governed by a Creative Commons licence – details of these licences and which [Creative Commons](#) licence will apply to this Work are set out in our licence referred to above.

Other than as permitted in any relevant BMJ Author's Self Archiving Policies, I confirm this Work has not been accepted for publication elsewhere, is not being considered for publication elsewhere and does not duplicate material already published. I confirm all authors consent to publication of this Work and authorise the granting of this licence.

1  
2  
3  
4 1 **Association between recovery/occurrence of metabolic syndrome and rapid**  
5  
6 2 **estimated glomerular filtration rate decline in middle-aged and older**  
7  
8 3 **populations: evidence from the China Health and Retirement Longitudinal**  
9  
10 4 **Study**

11  
12 5 **Peijia Liu,<sup>1</sup> Leile Tang,<sup>2</sup> Jia fang,<sup>1</sup> Chaojin Chen,<sup>3\*</sup> Xun Liu<sup>1\*</sup>**

13  
14 6 <sup>1</sup>Department of Nephrology, The Third Affiliated Hospital of Sun Yat-Sen University,  
15  
16 7 Guangzhou, Guangdong, China;

17  
18 8 <sup>2</sup>Department of Cardiology, The Third Affiliated Hospital of Sun Yat-Sen University,  
19  
20 9 Guangzhou, Guangdong, China

21  
22 10 <sup>3</sup>Department of Anesthesiology, Third Affiliated Hospital of Sun Yat-sen University,  
23  
24 11 Guangzhou, Guangdong, China

25  
26  
27  
28 13 **\*Correspondence to**

29  
30 14 Dr Xun Liu;

31  
32 15 [naturestyle@163.com](mailto:naturestyle@163.com);

33  
34 16 Department of Nephrology,

35  
36 17 The Third Affiliated Hospital of Sun Yat-Sen University,

37  
38 18 Guangzhou, Guangdong, 510630, China

39  
40 19 &

41  
42 20 Dr Chaojin Chen;

43  
44 21 [chenchj28@mail.sysu.edu.cn](mailto:chenchj28@mail.sysu.edu.cn);

45  
46 22 Department of Anesthesiology,

47  
48 23 The Third Affiliated Hospital of Sun Yat-Sen University,

49  
50 24 Guangzhou, Guangdong, 510630, China  
51  
52  
53  
54  
55  
56  
57  
58  
59  
60

1  
2  
3  
4 25 **Abstract**

5  
6 26 **Objectives** We sought to address this knowledge gap by investigating associations  
7  
8 27 between metabolic syndrome (MetS) recovery/development and rapid estimated  
9  
10 28 glomerular filtration rate (eGFR) decline in the China Health and Retirement  
11  
12 29 Longitudinal Study (CHARLS).

13  
14 30 **Design** Longitudinal cohort study.

15  
16 31 **Setting** This study is a secondary analysis of CHARLS.

17  
18 32 **Participants** After excluding individuals with age < 45 years old, eGFR < 60  
19  
20 33 ml/min/1.73m<sup>2</sup> and clinician-reported malignant tumor, heart disease, stroke or kidney  
21  
22 34 disease at baseline, 4142 participants with complete data were selected from the  
23  
24 35 CHARLS during the 4-year follow-up.

25  
26 36 **Outcome measures** MetS were measured at both the beginning and the end of the  
27  
28 37 4-year follow-up. A rapid eGFR decline was defined as an average annual eGFR  
29  
30 38 decline of > 3 ml/min/1.73m<sup>2</sup>. The associations between rapid eGFR decline and  
31  
32 39 MetS recovery/development were analyzed using multivariable adjusted logistic  
33  
34 40 models.

35  
36 41 **Results** According to MetS baseline status and follow-up, participants were divided  
37  
38 42 into four groups: (1) 2460 (59.4%) in the MetS-free group, (2) 361 (8.7%) in the  
39  
40 43 MetS-developed group, (3) 499 (12.0%) in the MetS recovery-group, and (4) 822  
41  
42 44 (19.8%) in the MetS-chronic group. When compared with the MetS-chronic group,  
43  
44 45 the multivariable adjusted odds ratio (OR) of rapid eGFR decline in the  
45  
46 46 MetS-recovery group was 0.64 (OR: 0.64; 95% confidence interval (CI): 0.45–0.90, *P*  
47  
48 47 = 0.01). In contrast, when compared with the MetS-free group, the multivariable  
49  
50 48 adjusted OR of rapid eGFR decline in the MetS-developed group was 1.00 (OR: 1.00;  
51  
52 49 95% CI: 0.73–1.38, *P* = 0.98).

53  
54 50 **Conclusions** Over a 4-year follow-up period, we found that MetS recovery was  
55  
56 51 associated with a reduced risk of rapid eGFR decline in middle-aged and older adults,  
57  
58 52 while MetS occurrence was not related to rapid eGFR decline. Recovery from MetS  
59  
60



1  
2  
3  
4 53 appeared to protect against a rapid decline in eGFR.

5  
6 54 **Keywords:** chronic renal failure; lipid disorders; public health;

7  
8 55

9  
10 56 **Strength and limitation of this study**

11  
12 57 This study investigated the association between altered metabolic syndrome  
13  
14 58 status and rapid glomerular filtration rate decline in a nationwide cohort.

15  
16 59 Metabolic syndrome scores were applied to evaluate the metabolic syndrome  
17  
18 60 severity.

19  
20 61 Blood tests related to metabolic syndrome and serum creatinine were performed  
21  
22 62 only once.

## 63 Introduction

64 Metabolic Syndrome (MetS) is a cluster of clinical characteristics related to  
65 abdominal obesity, dyslipidemia, elevated blood glucose (BG), and elevated blood  
66 pressure (BP)<sup>1-3</sup>. As of 2017, there were approximately 1 billion individuals with  
67 MetS around the world, of which China accounted for 21.7%<sup>4</sup>. In China, MetS  
68 prevalence has been undergoing a steady increase, concomitant with an increasingly  
69 aged population, an obesity epidemic, and increased diabetes and hypertension levels,  
70 which collectively pose a considerable threat to people's health and impose a heavy  
71 burden on healthcare systems<sup>4-6</sup>.

72 While investigations of causality relationships between MetS and cardiovascular  
73 events have gained considerable traction in recent years<sup>7-9</sup>, MetS also impacts the  
74 kidneys. It is accepted that the pathological mechanisms underpinning MetS mainly  
75 include insulin resistance, increased oxidative stress, and a chronic inflammatory  
76 state, which may lead to kidney degeneration and chronic kidney disease (CKD)  
77 development<sup>5,6</sup>. Previously, it was confirmed that MetS and associated components  
78 (abdominal obesity, elevated BG, elevated BP, and lipid metabolic disorder) are  
79 strongly related to CKD and a decreased estimated glomerular filtration rate (eGFR)  
80<sup>10-14</sup>. Several longitudinal studies reported that MetS and its components were  
81 associated with incremental rapid eGFR decline and CKD incidence<sup>15-18</sup>. However,  
82 these studies failed to articulate the relationship between MetS alterations and renal  
83 function changes. This dearth of information on this subject warrants further study,  
84 especially within a Chinese population context.

85 The China Health and Retirement Longitudinal Study (CHARLS) is a prospective  
86 cohort study conducted by the National School of Development, Peking University,  
87 China<sup>19</sup>. The nationwide sample assesses the social, behavioral, and health status of  
88 individuals aged 45 and older<sup>19</sup>. The CHARLS baseline survey was implemented in  
89 2011 (Wave 1), and the samples were followed up every two years. Blood samples  
90 from populations were only collected in 2011 (Wave1) and 2015 (Wave 3). In the

1  
2  
3  
4 91 current study, we explored the relationship between MetS recovery/occurrence and  
5  
6 92 rapid eGFR decline in middle-aged and older populations in the 4-year follow-up  
7  
8 93 cohort.

## 94 **Methods**

### 95 **Study population**

96 CHARLS is a nationally representative longitudinal survey on the social,  
97 economic, and health status of Chinese citizens aged  $\geq 45$  and their spouses in the  
98 community<sup>19</sup>. In total, 17,708 participants were registered at baseline (Wave 1), of  
99 which 11,847 had blood sample tests.

100 In this study, our exclusion criteria excluded participants with the following: 1)  
101 missing values; 2) without fasting blood values; 3) baseline eGFR  $< 60$   
102 ml/min/1.73m<sup>2</sup>; 4) clinician-reported malignant tumor, heart disease, stroke or kidney  
103 disease; 5)  $< 45$  years old; and 6) no follow-up records and related blood  
104 examinations in Wave 3. After applying these criteria, 4142 participants were finally  
105 included. The participant screening process is outlined (Fig. 1).

106 The Medical Ethics Review Committee of Peking University approved this study.  
107 All participants provided written informed consent before participating. This study is  
108 a secondary analysis of a public dataset and does not require ethics approval again.

### 109 **Blood examinations**

110 At baseline (Wave 1), blood measurements and hemoglobin were assayed by the  
111 Center for Disease Control and Prevention of the local county, whereas other  
112 biochemical indicators were analyzed by Youanmen Center for Clinical Laboratory of  
113 Capital Medical University, Beijing, China. Serum creatinine (Scr) was measured by  
114 the picric acid method; blood urea nitrogen (BUN) was determined by an enzymatic  
115 UV method with urease; blood glucose (BG), total cholesterol, high density  
116 lipoprotein (HDL) cholesterol, and triglyceride (TG) were assayed by enzymatic  
117 colorimetric tests; glycosylated hemoglobin (GHbA1c) was determined by high  
118 performance liquid chromatography; high-sensitivity C-reactive protein (hs-CRP) was

1  
2  
3  
4 119 examined by immunoturbidimetric assay; and uric acid (UA) was determined by the  
5  
6 120 UA plus method <sup>20</sup>. Blood specimen testing in 2015 (Wave 3) was completed by  
7  
8 121 KingMed Diagnostics, the leading third-party institution in China, which has testing  
9  
10 122 laboratories in 27 provincial-level cities nationwide. GHbA1c, Scr, HDL, TG and BG  
11  
12 123 were the required blood biomarkers from Wave 3. GHbA1c and Scr levels were  
13  
14 124 determined by the same methods as Wave 1, while HDL was determined by a direct  
15  
16 125 method, TG by an oxidase method, and BG by a hexokinase method <sup>21</sup>. The  
17  
18 126 collection, storage, transport, processing, and other blood sample details are described  
19  
20 127 elsewhere <sup>20 21</sup>. Of note, the models and manufacturer information of blood test  
21  
22 128 instruments in Wave 1 and Wave 3 were not available. All inspections and  
23  
24 129 calibrations were performed by trained personnel.

### 130 **Definition and grouping of MetS**

131 Currently, there was no unified definition for MetS. The World Health  
132  
133 Origination (WHO) diagnostic criteria proposed in 1999, the National Cholesterol  
134  
135 Education Program Adult Panel III (ATP III ) diagnostic criteria proposed in 2005,  
136  
137 and International Diabetes Federation (IDF) diagnostic criteria proposed in 2006 were  
138  
139 commonly used for metabolic syndrome <sup>22</sup>. These diagnostic criteria basically related  
140  
141 to abdominal obesity, dyslipidemia, glucose metabolism disorder, and elevated blood  
142  
143 pressure. However, these diagnostic criteria had different views and cut-off values for  
144  
145 some specific indicators. This study adopted the 2018 China Guidelines for the  
146  
147 Prevention and Treatment of Hypertension (CGPTH) definition for MetS, which was  
148  
149 similar to the ATP III diagnostic criteria <sup>2</sup>. Compared with ATP III diagnostic criteria,  
150  
151 the cut points of waist circumference defined by CGPTH were smaller and more  
152  
153 suitable for the Chinese population. According to the 2018 CGPTH definition, MetS  
154  
155 was diagnosed when three of the following four conditions were met: 1) Central  
156  
157 obesity: waist circumference (WC)  $\geq 90$  cm in men and  $\geq 85$  cm in women; 2)  
158  
159 Elevated BP: systolic blood pressure (SBP)  $\geq 130$  mmHg or diastolic blood pressure  
160  
(DBP)  $\geq 85$  mmHg, or diagnosed as hypertension and treated; 3) Dyslipidemia:

1  
2  
3  
4 147 fasting TG  $\geq$  150 mg/dL, or HDL  $\leq$  40 mg/dL, or diagnosed as dyslipidemia and  
5  
6 148 treated; and 4) Elevated BG: Fasting BG (FBG)  $\geq$  100 mg/dL, or 2 h postprandial BG  
7  
8 149  $\geq$  100 mg/dL, or diagnosed as diabetes and treated<sup>2</sup>. Diabetes was defined as fasting  
9  
10 150 BG  $\geq$  126 mg/dL, and/or HbA1c  $\geq$  6.5%, and/or a self-reported history of diabetes<sup>23</sup>.  
11  
12 151 Of note, we did not have 2 h postprandial BG data.

13  
14 152 According to MetS baseline status and follow-up, participants were categorized  
15  
16 153 into 1) MetS-free, 2) MetS-developed, 3) MetS-recovery, and 4) MetS-chronic  
17  
18 154 groups.

### 19 20 155 **Study outcomes**

21  
22 156 We calculated eGFR values using the 2012 Chronic Kidney Disease  
23  
24 157 Epidemiology Collaboration equation based on creatinine levels<sup>24</sup>. A rapid eGFR  
25  
26 158 decline was defined as an average annual eGFR decline of  $> 3$  ml/min/1.73m<sup>2</sup><sup>16 25</sup>. In  
27  
28 159 this study, we defined a rapid eGFR decline as the eGFR in Wave 3 minus the eGFR  
29  
30 160 in Wave 1,  $> 12$  ml/min/1.73m<sup>2</sup>.

### 31 32 161 **MetS scores**

33  
34 162 MetS severity potentially affects the recovery or occurrence of MetS. For  
35  
36 163 instance, individuals with high MetS severity may be less liable to recover. Similarly,  
37  
38 164 for those without MetS, it is not straightforward to progress to severe MetS.  
39  
40 165 Therefore, MetS scores were introduced to assess MetS severity in the study, which  
41  
42 166 was thought to be more sufficient and accurate than other ways using the number of  
43  
44 167 symptoms and complications to reflect MetS severity<sup>26 27</sup>. These scores were  
45  
46 168 calculated using principal component (PC) analysis of WC, mean arterial pressure  
47  
48 169 (MAP), FBG, fasting TG, and the inverse HDL values. All MetS related variables  
49  
50 170 were normalized by 0–1. According to the PC analysis results, PC1 and PC2  
51  
52 171 explained 38.9% and 20.9% of the variance, respectively. MetS scores were  
53  
54 172 calculated as follows:

55  
56  
57 173 
$$PC1 = 0.369 \times WC + 0.378 \times FBG + 0.585 \times TG + 0.562 \times \left( \frac{1}{HDL} \right) + 0.252 \times MAP,$$

$$174 \quad PC2 = 0.503 \times WC - 0.171 \times FBG - 0.268 \times TG - 0.274 \times \left( \frac{1}{HDL} \right) + 0.755 \times MAP,$$

$$175 \quad \text{MetS score} = 0.389 \times PC1 + 0.209 \times PC2$$

### 176 **Other covariates**

177 All potential covariates were all collected at baseline in Wave 1, including gender  
178 (male vs. female), age, marital status (married with spouse vs. others), education  
179 (illiterate, middle school and below, or high school and above), household per capita  
180 income, smoking (yes vs. no), drinking (yes vs. no), eGFR, grip strength, height,  
181 weight, body mass index (BMI), WC, SBP, DBP, MAP, depressive symptom (yes vs.  
182 no), self-reporting disease (hypertension, diabetes, dyslipidemia and ), and  
183 corresponding medication. We categorized eGFR into two groups: 60–89 and  $\geq 90$ .  
184 Grip strength was divided into three groups (T1, T2, and T3) according to the  
185 one-third percentile. BMI was calculated by weight (kg)/height squared (m<sup>2</sup>). The BP  
186 of each participant was measured three times every 45–60 s with the Omron<sup>TM</sup>  
187 HEM-7112 sphygmomanometer (Omron Co. LTD, Dalian, China) at rest. Both SBP  
188 and DBP were averaged from three measurements. MAP was defined as  $MAP = 1/3 \times$   
189  $SBP + 2/3 \times DBP$ . Previous study demonstrated that depressive symptom was  
190 association with baseline eGFR<sup>28</sup>. Thus, we should not overlook this variable. The  
191 10-item Center for Epidemiological Studies Depression Scale (CESD-10) was applied  
192 in the study<sup>29</sup>. A CESD-10 score  $\geq 10$  was grouped into the depressive symptom  
193 group, and  $< 10$  into the non-depressive symptom group. Self-reporting disease was  
194 disease diagnosed by a doctor. Medical interventions included taking Chinese  
195 traditional and Western modern medicines.

### 196 **Statistical methods**

197 The Kolmogorov-Smirnov test was used to test the normality of continuous  
198 variables. Continuous variables were expressed by the median (interquartile range)  
199 and categorical variables by frequency (%). The Mann-Whitney U test was performed  
200 on continuous variables, and categorical variables between the rapid eGFR decline  
201 group and the non-rapid eGFR decline group were tested by the Chi-square test. In

1  
2  
3  
4 202 preliminary analyses, variables with P values < 0.15 were used to calibrate the logistic  
5  
6 203 model. Continuous variables not presenting a linear relationship with the logit  
7  
8 204 conversion value of the dependent variable were converted to categorical variables.  
9  
10 205 Tolerance and variance inflation factors (VIFs) were used to test for collinearity. This  
11  
12 206 existed if the tolerance was < 0.1 or the VIF was > 10. Eventually, age, sex, BMI, Scr,  
13  
14 207 hemoglobin, eGFR classification, grip strength classification and MetS scores were  
15  
16 208 selected as confounding variables for model adjustments in this study. Most selected  
17  
18 209 covariates have been reported to be related to renal events<sup>26 30-33</sup>. Univariate analysis  
19  
20 210 of variables between eGFR decline group and non-rapid eGFR decline group were  
21  
22 211 carried out. Logistic models were used to test the association between MetS  
23  
24 212 recovery/occurrence and eGFR rapid decline after adjusting for multiple confounding  
25  
26 213 factors. Furthermore, alterations in MetS status were accompanied by changes of  
27  
28 214 diagnostic conditions (elevated blood glucose, elevated blood pressure, central obesity  
29  
30 215 and dyslipidemia). As a result, logistic models were used to explore the relationship  
31  
32 216 between the recovery/occurrence of Mets components and the rapid decline of eGFR  
33  
34 217 using different adjustments of confounding factors, respectively.  $P < 0.05$  was  
35  
36 218 considered statistically significant (two-sided test). Statistics were generated in IBM  
37  
38 219 SPSS 20.0 software (IBM Corp, Armonk, NY, USA) and StataMP 16 software  
39  
40 220 (StataCorp, Texas, USA).

#### 41 42 221 **Patient and public involvement**

43  
44 222 There were no participants involved in the development. The results of the  
45  
46 223 survey are disseminated to the public through websites.

47  
48 224

#### 49 50 225 **Results**

##### 51 52 226 **Participant characteristics**

53  
54 227 As shown (Fig. 1), 4142 participants were selected, including 2460 (59.4%) in the  
55  
56 228 MetS-free group, 361 (8.7%) in the MetS-developed group, 499 (12.0%) in the MetS  
57  
58 229 recovery-group, and 822 (19.8%) in the MetS-chronic group. Comparison of the basic  
59  
60

1  
2  
3  
4 230 characteristics between the 4142 enrolled participants and 2974 ones that excluded  
5  
6 231 during follow-up were shown in Supplemental Table 1.

7  
8 232 Participant characteristics were grouped by the eGFR decline rate (Table 1). A  
9  
10 233 rapid decline in eGFR developed in 711 (17.2%) participants during the 4-year  
11  
12 234 follow-up. The median age was 58 (52~64) years and males accounted for 42.5% at  
13  
14 235 baseline. In contrast to rapid eGFR decline group, the non-rapid eGFR decline group  
15  
16 236 was significantly higher with respect to FBG, Scr, hemoglobin, eGFR, weight, BMI,  
17  
18 237 WC, MetS scores, central obesity, and elevated BG (all  $P < 0.05$ ). Those in non-rapid  
19  
20 238 eGFR decline group were more likely to be female and younger when compared with  
21  
22 239 the eGFR decline group (both  $P < 0.05$ ).

23  
24 240

#### 25 26 241 **Rapid eGFR decline odds based on Mets recovery or occurrence**

27  
28 242 Univariate analysis was conducted to select covariates for correction  
29  
30 243 (Supplemental Table 2). As shown (Table 2), after adjustment for age, sex, BMI, Scr,  
31  
32 244 hemoglobin, eGFR classification, grip strength classification, and MetS scores, the  
33  
34 245 odds ratio (OR) of rapid eGFR decline in the MetS-recovery group was 0.64 (OR:  
35  
36 246 0.64; 95% CI: 0.45–0.90,  $P = 0.01$ ) when compared with the MetS-chronic group. In  
37  
38 247 contrast, after adjustment for age, sex, BMI, serum creatinine, hemoglobin, eGFR  
39  
40 248 classification, grip strength classification, and MetS score, the OR of rapid eGFR  
41  
42 249 decline in the MetS-developed group was 1.00 (OR: 1.00; 95% CI: 0.73–1.38,  $P =$   
43  
44 250 0.98) when compared with the MetS-free group.

#### 45 46 251 **MetS components and rapid eGFR decline odds**

47  
48 252 The association of changes in the composition of MetS groups with rapid eGFR  
49  
50 253 decline is shown (Table 3). In the baseline MetS population, after adjustment for age,  
51  
52 254 sex, BMI, serum creatinine, hemoglobin, eGFR classification, grip strength  
53  
54 255 classification, and MetS score, the OR of rapid eGFR decline in the population  
55  
56 256 recovered from central obesity was 0.31 (OR: 0.31; 95% CI: 0.15–0.65,  $P < 0.01$ )  
57  
58 257 when compared with chronic central obesity, whereas recovery from elevated BP,  
59  
60



1  
2  
3  
4 258 dyslipidemia, and elevated BG did not show statistically significant differences when  
5  
6 259 compared with the corresponding population (all  $P > 0.05$ ). In the baseline population  
7  
8 260 without MetS, we observed no statistical difference in the rapid decline of eGFR  
9  
10 261 between the occurrence of all MetS component groups and corresponding contrast  
11  
12 262 groups (all  $P > 0.05$ ). This was consistent with the overall trend.

### 13 14 263 **Discussion**

15  
16 264 We examined the relationship between MetS changes and rapid eGFR decline in  
17  
18 265 a large nationwide cohort. At the 4-year follow-up, MetS recovery was significantly  
19  
20 266 associated with a reduced risk of rapid eGFR decline in the middle-aged and elderly,  
21  
22 267 with only WC recovery consistent with the overall trend. The occurrence of MetS and  
23  
24 268 its components did not significantly increase the risk of rapid eGFR decline. Further  
25  
26 269 follow-up is required to elucidate the relationship between MetS dynamics and the  
27  
28 270 rapid decline in eGFR.

29  
30 271 Longitudinal cohort studies in several Asian countries concluded that MetS  
31  
32 272 increased the risk of CKD, although follow-up times varied from study to study<sup>15-18</sup>  
33  
34 273<sup>34</sup>. However, the effect of MetS on the rapid decline of eGFR remains controversial.  
35  
36 274 In a 3-year cohort, Cheng *et al.* found no significant correlations between MetS and  
37  
38 275 eGFR rapid decline in the elderly<sup>34</sup>. However, other studies reported that baseline  
39  
40 276 MetS was associated with a decline in eGFR and even acted as an independent  
41  
42 277 predictor of eGFR decline<sup>16-18</sup>. Wu *et al.* investigated the association between the  
43  
44 278 MetS severity score and kidney function, and found that the MetS severity score was  
45  
46 279 an independent risk factor for the CKD development and progressive eGFR decline,  
47  
48 280 although the definition of rapid eGFR decline was different from this study<sup>26</sup>. Here,  
49  
50 281 the MetS severity score was a continuous variable that was primarily used to calibrate  
51  
52 282 the MetS (yes vs. no). We noted that none of the aforementioned studies accounted  
53  
54 283 for the MetS status of participants during follow-up periods. In a 4-year follow-up  
55  
56 284 cohort, Park *et al.* explored the relationship between MetS status change and CKD  
57  
58 285 events and concluded that MetS recovery was associated with a decreased risk of  
59  
60

1  
2  
3  
4 286 CKD incidence, but the occurrence of MetS increased the risk of CKD incidence <sup>35</sup>.  
5  
6 287 One of the highlights of the article was to observe the status of MetS three times over  
7  
8 288 a 4-year period, thereby making the MetS diagnosis more robust. However, Park *et al.*  
9  
10 289 did not discuss the association with the rapid eGFR decline. In this study, we  
11  
12 290 concluded that MetS recovery was associated with a reduced risk of rapid eGFR  
13  
14 291 decline, while MetS occurrence was not related to rapid eGFR decline. It should be  
15  
16 292 emphasized that we need to be cautious about the conclusion between the MetS  
17  
18 293 occurrence and the rapid eGFR decline in this study. Because the follow-up time was  
19  
20 294 short and the timing of MetS onset was unknown, the impairment of renal function  
21  
22 295 caused by MetS may not have occurred in some populations. To sum up, studies  
23  
24 296 exploring the relationship between MetS dynamic changes and the rapid decline of  
25  
26 297 eGFR in the Chinese population are rare. Our investigation of the relationship  
27  
28 298 between MetS recovery/occurrence and eGFR rapid decline in a large nationwide  
29  
30 299 cohort may support renal function management in individuals with MetS.

31  
32 300 The effect of MetS on renal function is complex, thus, no definitive mechanisms  
33  
34 301 can explain our study observations. The evidence suggests that every component of  
35  
36 302 MetS is associated with adverse renal events (10-14). It is accepted that hypertension  
37  
38 303 and diabetes play pivotal roles in CKD development and progression <sup>36-38</sup>. Also, lipid  
39  
40 304 metabolism dysregulation and abnormal lipid distribution can lead to  
41  
42 305 lipotoxicity-related renal damage <sup>39 40</sup>. Thus, MetS may result from the combined  
43  
44 306 effects of central obesity, increased BP, insulin resistance, and blood lipid disorder,  
45  
46 307 leading to physiopathological lipotoxicity, oxidative stress increments, endothelial  
47  
48 308 dysfunction, elevated inflammation, and apoptosis, which would contribute to kidney  
49  
50 309 dysfunction <sup>5 39</sup>. However, the relationship between MetS components and the weight  
51  
52 310 of each factor on kidney injury remain unclear.

53  
54 311 Our study had some limitations. Firstly, MetS diagnoses were not  
55  
56 312 comprehensively checked (using multiple tests), and the exact timing of the MetS  
57  
58 313 alteration is unknown. Secondly, renal stone disease, epiculopathy, epiculoepicardial  
59  
60

1  
2  
3  
4 314 disease or acute urinary tract infection are related to the occurrence and development  
5  
6 315 of renal disease. Unfortunately, urine or kidney ultrasound results were unavailable in  
7  
8 316 CHARLS cohort. Thirdly, CKD occurrence was not included as a study outcome  
9  
10 317 because of the lack of urine test results, which would underestimate the CKD  
11  
12 318 incidence. Fourthly, blood analyses from Wave 1 and Wave 3 were performed at a  
13  
14 319 different testing center, with inconsistent HDL, TG, and BG measurement methods,  
15  
16 320 therefore, measurement errors may have occurred. Fifthly, a large proportion of  
17  
18 321 individuals were excluded due to exclusion criteria or missing values and this may  
19  
20 322 have biased some of our results. Sixthly, we did not establish a model with all 4 MetS  
21  
22 323 change groups included in the study.

#### 23 24 324 **Conclusions**

25  
26 325 Over a 4-year follow-up, we observed that MetS recovery, including recovery of  
27  
28 326 central obesity, was associated with a reduced risk of rapid eGFR decline in  
29  
30 327 middle-aged and older adults, while MetS occurrence was not related to rapid eGFR  
31  
32 328 decline. Reversing MetS, especially central obesity, might benefit the kidney function  
33  
34 329 in MetS population. But, further follow-up studies are required to observe the  
35  
36 330 relationship between MetS alterations and adverse renal events.

37  
38  
39 331 **Acknowledgements** The authors are grateful to the China Health and Retirement  
40  
41 332 Longitudinal Study (CHARLS) team for providing the data.

42  
43  
44 333 **Contributors** PL and LT contributed equally to this paper. PL, LT and JF—analysis  
45  
46 334 and interpretation of data and preparation of the manuscript. XL—study concept and  
47  
48 335 design, and preparation and critical review of the manuscript. CC—critical review and  
49  
50 336 statistical guidance of the revised manuscript. All authors have approved the final  
51  
52 337 manuscript.

53  
54 338 **Funding** This work was supported by Guangzhou Municipal Science and Technology  
55  
56 339 Bureau (202002020047).

57  
58  
59 340 **Competing interests** All authors declared no competing interests.

1  
2  
3  
4 341 **Data availability statement** CHARLS data of the study will be available to  
5  
6 342 investigators at the CHARLS website (<http://charls.pku.edu.cn/en>).

7  
8 343 **References**

- 9 344 1. Alberti KG, Zimmet P, Shaw J. The metabolic syndrome--a new worldwide definition. *Lancet*  
10 345 (*London, England*) 2005;366(9491):1059-62. doi: 10.1016/s0140-6736(05)67402-8 [published  
11 346 Online First: 2005/09/27]
- 12 347 2. 2018 Chinese Guidelines for Prevention and Treatment of Hypertension-A report of the Revision  
13 348 Committee of Chinese Guidelines for Prevention and Treatment of Hypertension. *Journal of*  
14 349 *geriatric cardiology : JGC* 2019;16(3):182-241. doi: 10.11909/j.issn.1671-5411.2019.03.014  
15 350 [published Online First: 2019/05/14]
- 16 351 3. Huang PL. A comprehensive definition for metabolic syndrome. *Disease models & mechanisms*  
17 352 2009;2(5-6):231-7. doi: 10.1242/dmm.001180 [published Online First: 2009/05/02]
- 18 353 4. Saklayen MG. The Global Epidemic of the Metabolic Syndrome. *Current hypertension reports*  
19 354 2018;20(2):12. doi: 10.1007/s11906-018-0812-z [published Online First: 2018/02/27]
- 20 355 5. McCracken E, Monaghan M, Sreenivasan S. Pathophysiology of the metabolic syndrome. *Clinics in*  
21 356 *dermatology* 2018;36(1):14-20. doi: 10.1016/j.clindermatol.2017.09.004 [published Online  
22 357 First: 2017/12/16]
- 23 358 6. Zhang X, Lerman LO. The metabolic syndrome and chronic kidney disease. *Translational research :*   
24 359 *the journal of laboratory and clinical medicine* 2017;183:14-25. doi:  
25 360 10.1016/j.trsl.2016.12.004 [published Online First: 2016/12/28]
- 26 361 7. Lee EY, Han K, Kim DH, et al. Exposure-weighted scoring for metabolic syndrome and the risk of  
27 362 myocardial infarction and stroke: a nationwide population-based study. *Cardiovascular*  
28 363 *diabetology* 2020;19(1):153. doi: 10.1186/s12933-020-01129-x [published Online First:  
29 364 2020/10/01]
- 30 365 8. Guembe MJ, Fernandez-Lazaro CI, Sayon-Orea C, et al. Risk for cardiovascular disease associated  
31 366 with metabolic syndrome and its components: a 13-year prospective study in the RIVANA  
32 367 cohort. *Cardiovascular diabetology* 2020;19(1):195. doi: 10.1186/s12933-020-01166-6  
33 368 [published Online First: 2020/11/24]
- 34 369 9. Hoang K, Zhao Y, Gardin JM, et al. LV Mass as a Predictor of CVD Events in Older Adults With and  
35 370 Without Metabolic Syndrome and Diabetes. *JACC Cardiovascular imaging* 2015;8(9):1007-15.  
36 371 doi: 10.1016/j.jcmg.2015.04.019 [published Online First: 2015/09/01]
- 37 372 10. Xie K, Bao L, Jiang X, et al. The association of metabolic syndrome components and chronic kidney  
38 373 disease in patients with hypertension. *Lipids Health Dis* 2019;18(1):229. doi:  
39 374 10.1186/s12944-019-1121-5 [published Online First: 2019/12/29]
- 40 375 11. Viazzi F, Piscitelli P, Giorda C, et al. Metabolic syndrome, serum uric acid and renal risk in patients  
41 376 with T2D. *PLoS one* 2017;12(4):e0176058. doi: 10.1371/journal.pone.0176058 [published  
42 377 Online First: 2017/04/20]
- 43 378 12. Chen J, Kong X, Jia X, et al. Association between metabolic syndrome and chronic kidney disease in  
44 379 a Chinese urban population. *Clin Chim Acta* 2017;470:103-08. doi: 10.1016/j.cca.2017.05.012  
45 380 [published Online First: 2017/05/16]
- 46 381 13. Thomas G, Sehgal AR, Kashyap SR, et al. Metabolic syndrome and kidney disease: a systematic

- 1  
2  
3 382 review and meta-analysis. *Clinical journal of the American Society of Nephrology : CJASN*  
4 383 2011;6(10):2364-73. doi: 10.2215/cjn.02180311 [published Online First: 2011/08/20]  
5  
6 384 14. Chang IH, Han JH, Myung SC, et al. Association between metabolic syndrome and chronic kidney  
7 385 disease in the Korean population. *Nephrology (Carlton, Vic)* 2009;14(3):321-6. doi:  
8 386 10.1111/j.1440-1797.2009.01091.x [published Online First: 2009/05/16]  
9  
10 387 15. Hu Y, Shi LX, Zhang Q, et al. Increased Risk of Chronic Kidney Diseases in Patients with Metabolic  
11 388 Syndrome: A 3-year Prospective Cohort Study. *Current medical science* 2019;39(2):204-10.  
12 389 doi: 10.1007/s11596-019-2020-8 [published Online First: 2019/04/25]  
13  
14 390 16. Huh JH, Yadav D, Kim JS, et al. An association of metabolic syndrome and chronic kidney disease  
15 391 from a 10-year prospective cohort study. *Metabolism: clinical and experimental*  
16 392 2017;67:54-61. doi: 10.1016/j.metabol.2016.11.003 [published Online First: 2017/01/14]  
17 393  
18 394 17. Hayashi K, Takayama M, Abe T, et al. Investigation of Metabolic Factors Associated with eGFR  
19 395 Decline Over 1 Year in a Japanese Population without CKD. *Journal of atherosclerosis and*  
20 396 *thrombosis* 2017;24(8):863-75. doi: 10.5551/jat.38612 [published Online First: 2017/01/27]  
21 397  
22 398 18. Kawamoto R, Akase T, Ninomiya D, et al. Metabolic syndrome is a predictor of decreased renal  
23 399 function among community-dwelling middle-aged and elderly Japanese. *International*  
24 400 *urology and nephrology* 2019;51(12):2285-94. doi: 10.1007/s11255-019-02320-0 [published  
25 401 Online First: 2019/10/24]  
26 402  
27 403 19. Zhao Y, Hu Y, Smith JP, et al. Cohort profile: the China Health and Retirement Longitudinal Study  
28 404 (CHARLS). *Int J Epidemiol* 2014;43(1):61-8. doi: 10.1093/ije/dys203 [published Online First:  
29 405 2012/12/18]  
30 406  
31 407 20. Zhao Y, Crimmins E, Hu P, et al. ChinaHealth and Retirement Longitudinal Study: 2011–2012  
32 408 National Baseline Users' Guide. *Beijing, China: National School of Development, Peking*  
33 409 *University* 2013  
34 410  
35 411 21. Chen X, Crimmins E, Hu PP, et al. Venous Blood-Based Biomarkers in the China Health and  
36 412 Retirement Longitudinal Study: Rationale, Design, and Results From the 2015 Wave.  
37 413 *American journal of epidemiology* 2019;188(11):1871-77. doi: 10.1093/aje/kwz170  
38 414 [published Online First: 2019/08/01]  
39 415  
40 416 22. Alberti KG, Eckel RH, Grundy SM, et al. Harmonizing the metabolic syndrome: a joint interim  
41 417 statement of the International Diabetes Federation Task Force on Epidemiology and  
42 418 Prevention; National Heart, Lung, and Blood Institute; American Heart Association; World  
43 419 Heart Federation; International Atherosclerosis Society; and International Association for the  
44 420 Study of Obesity. *Circulation* 2009;120(16):1640-5. doi: 10.1161/circulationaha.109.192644  
45 421 [published Online First: 2009/10/07]  
46 422  
47 423 23. Classification and Diagnosis of Diabetes: Standards of Medical Care in Diabetes-2021. *Diabetes*  
48 424 *Care* 2021;44(Suppl 1):S15-s33. doi: 10.2337/dc21-S002 [published Online First: 2020/12/11]  
49 425  
50 426 24. Inker LA, Schmid CH, Tighiouart H, et al. Estimating glomerular filtration rate from serum  
51 427 creatinine and cystatin C. *The New England journal of medicine* 2012;367(1):20-9. doi:  
52 428 10.1056/NEJMoa1114248  
53 429  
54 430 25. Lindeman RD, Tobin J, Shock NW. Longitudinal studies on the rate of decline in renal function with  
55 431 age. *Journal of the American Geriatrics Society* 1985;33(4):278-85. doi:  
56 432 10.1111/j.1532-5415.1985.tb07117.x [published Online First: 1985/04/01]  
57 433  
58  
59  
60

- 1  
2  
3 424 26. Wu M, Shu Y, Wang L, et al. Metabolic syndrome severity score and the progression of CKD.  
4 425 *European journal of clinical investigation* 2021:e13646. doi: 10.1111/eci.13646 [published  
5 426 Online First: 2021/07/02]  
6  
7 427 27. Wijndaele K, Beunen G, Duvigneaud N, et al. A continuous metabolic syndrome risk score: utility  
8 428 for epidemiological analyses. *Diabetes Care* 2006;29(10):2329. doi: 10.2337/dc06-1341  
9 429 [published Online First: 2006/09/28]  
10  
11 430 28. Jia F, Li X, Liu F, et al. Association of renal function and depressive symptoms: Evidence from the  
12 431 China health and retirement longitudinal study. *Journal of psychosomatic research*  
13 432 2020;137:110224. doi: 10.1016/j.jpsychores.2020.110224 [published Online First:  
14 433 2020/08/31]  
15  
16 434 29. Irwin M, Artin KH, Oxman MN. Screening for depression in the older adult: criterion validity of the  
17 435 10-item Center for Epidemiological Studies Depression Scale (CES-D). *Archives of internal*  
18 436 *medicine* 1999;159(15):1701-4. doi: 10.1001/archinte.159.15.1701 [published Online First:  
19 437 1999/08/17]  
20  
21 438 30. Ma X, Zhang C, Su H, et al. Increasing Body Mass Index Predicts Rapid Decline in Renal Function: A  
22 439 5 Year Retrospective Study. *Hormone and metabolic research = Hormon- und*  
23 440 *Stoffwechselforschung = Hormones et metabolisme* 2018;50(7):556-61. doi:  
24 441 10.1055/a-0599-6360 [published Online First: 2018/05/03]  
25  
26 442 31. Meguro S, Tomita M, Kabeya Y, et al. Factors Associated with the Decline of Kidney Function Differ  
27 443 among eGFR Strata in Subjects with Type 2 Diabetes Mellitus. *International journal of*  
28 444 *endocrinology* 2012;2012:687867. doi: 10.1155/2012/687867 [published Online First:  
29 445 2013/01/15]  
30  
31 446 32. Deicher R, Hörl WH. Anaemia as a risk factor for the progression of chronic kidney disease. *Current*  
32 447 *opinion in nephrology and hypertension* 2003;12(2):139-43. doi:  
33 448 10.1097/00041552-200303000-00003 [published Online First: 2003/02/18]  
34  
35 449 33. Young BA, Katz R, Boulware LE, et al. Risk Factors for Rapid Kidney Function Decline Among African  
36 450 Americans: The Jackson Heart Study (JHS). *Am J Kidney Dis* 2016;68(2):229-39. doi:  
37 451 10.1053/j.ajkd.2016.02.046 [published Online First: 2016/04/14]  
38  
39 452 34. Cheng HT, Huang JW, Chiang CK, et al. Metabolic syndrome and insulin resistance as risk factors  
40 453 for development of chronic kidney disease and rapid decline in renal function in elderly. *The*  
41 454 *Journal of clinical endocrinology and metabolism* 2012;97(4):1268-76. doi:  
42 455 10.1210/jc.2011-2658 [published Online First: 2012/02/18]  
43  
44 456 35. Park S, Lee S, Kim Y, et al. Reduced risk for chronic kidney disease after recovery from metabolic  
45 457 syndrome: A nationwide population-based study. *Kidney research and clinical practice*  
46 458 2020;39(2):180-91. doi: 10.23876/j.krcp.20.016 [published Online First: 2020/04/30]  
47  
48 459 36. Webster AC, Nagler EV, Morton RL, et al. Chronic Kidney Disease. *Lancet (London, England)*  
49 460 2017;389(10075):1238-52. doi: 10.1016/s0140-6736(16)32064-5 [published Online First:  
50 461 2016/11/27]  
51  
52 462 37. Tonneijck L, Muskiet MH, Smits MM, et al. Glomerular Hyperfiltration in Diabetes: Mechanisms,  
53 463 Clinical Significance, and Treatment. *J Am Soc Nephrol* 2017;28(4):1023-39. doi:  
54 464 10.1681/asn.2016060666 [published Online First: 2017/02/02]  
55  
56 465 38. Ruiz-Ortega M, Rayego-Mateos S, Lamas S, et al. Targeting the progression of chronic kidney  
57  
58  
59  
60

- 466 disease. *Nature reviews Nephrology* 2020;16(5):269-88. doi: 10.1038/s41581-019-0248-y  
 467 [published Online First: 2020/02/16]
- 468 39. Kim Y, Park CW. Can management of the components of metabolic syndrome modify the course  
 469 of chronic kidney disease? *Kidney research and clinical practice* 2020;39(2):118-20. doi:  
 470 10.23876/j.krcp.20.066 [published Online First: 2020/06/12]
- 471 40. D'Agati VD, Chagnac A, de Vries AP, et al. Obesity-related glomerulopathy: clinical and pathologic  
 472 characteristics and pathogenesis. *Nature reviews Nephrology* 2016;12(8):453-71. doi:  
 473 10.1038/nrneph.2016.75 [published Online First: 2016/06/07]  
 474

**Table 1. Baseline characteristics of participants between rapid eGFR decline group and non-rapid eGFR decline group**

| Characteristics                         | Overall<br>(n = 4142)      | Rapid eGFR decline<br>(n = 711) | Non-rapid eGFR decline<br>(n = 3431) | P value |
|-----------------------------------------|----------------------------|---------------------------------|--------------------------------------|---------|
| Male [n (%)]                            | 1874 (45.2)                | 351 (49.4)                      | 1523 (44.4)                          | 0.02    |
| Age (years)                             | 58 (52~64)                 | 59 (52~66)                      | 58 (52~64)                           | 0.02    |
| Married with spouse [n (%)]             | 3548 (87.5)                | 610 (85.8)                      | 2938 (85.6)                          | 0.91    |
| Education                               |                            |                                 |                                      |         |
| Illiterate [n (%)]                      | 1206 (29.1)                | 191 (26.9)                      | 1015 (29.6)                          |         |
| Middle school and below [n (%)]         | 1770 (41.2)                | 309 (43.5)                      | 1398 (40.7)                          | 0.28    |
| High school and above [n (%)]           | 1229 (29.7)                | 211 (29.7)                      | 1018 (29.7)                          |         |
| Household per capita income (yuan)      | 6461.0<br>(2336.7~13487.5) | 6000.0<br>(1866.7~13490.0)      | 6560.0<br>(2450.0~13486.7)           | 0.20    |
| Drink [n (%)]                           | 1470 (32.2)                | 234 (32.9)                      | 1173 (34.2)                          | 0.51    |
| Smoke [n (%)]                           | 1567 (37.8)                | 272 (38.3)                      | 1295 (37.7)                          | 0.80    |
| Blood urea nitrogen (mg/dl)             | 15.0 (12.5~17.8)           | 15.1 (12.6~18.2)                | 15.0 (12.5~17.7)                     | 0.18    |
| Fasting glucose (mg/dl)                 | 102.4 (94.9~111.2)         | 100.6 (93.4~109.8)              | 102.4 (95.2~111.4)                   | 0.001   |
| Creatinine (mg/dl)                      | 0.75 (0.64~0.84)           | 0.71 (0.60~0.84)                | 0.76 (0.64~0.86)                     | <0.001  |
| Total cholesterol (mg/dl)               | 190.6 (168.6~215.8)        | 189.8 (164.7~215.3)             | 190.6 (169.3~216.1)                  | 0.20    |
| Triglyceride (mg/dl)                    | 105.3 (74.3~148.7)         | 101.8 (71.7~146)                | 106.2 (74.3~148.7)                   | 0.23    |
| HDL cholesterol (mg/dl)                 | 49.1 (41.0~59.5)           | 49.5 (41.0~59.9)                | 49.1 (41.0~59.5)                     | 0.81    |
| hs-CRP (mg/l)                           | 1.0 (0.5~2.0)              | 1.0 (0.6~2)                     | 1.0 (0.5~2.0)                        | 0.43    |
| GHbA1c (%)                              | 5.1 (4.9~5.4)              | 5.1 (4.9~5.4)                   | 5.1 (4.9~5.4)                        | 0.36    |
| Uric acid (mg/dl)                       | 4.2 (3.5~5.0)              | 4.2 (3.5~5.0)                   | 4.2 (3.5~5.0)                        | 0.83    |
| Hemoglobin (mg/dl)                      | 14.2 (13.1~15.5)           | 14.0 (12.8~15.1)                | 14.3 (13.1~15.5)                     | <0.001  |
| eGFR (ml/min/1.73m <sup>2</sup> )       | 95.9 (86.4~102.9)          | 97.0 (88.3~106.1)               | 95.6 (85.9~102.4)                    | <0.001  |
| eGFR group                              |                            |                                 |                                      |         |
| 60~89 ml/min/1.73m <sup>2</sup> [n (%)] | 1368 (33.0)                | 209 (29.4)                      | 1158 (33.8)                          | 0.02    |
| 90~ ml/min/1.73m <sup>2</sup> [n (%)]   | 2774 (67.0)                | 502 (70.6)                      | 2272 (66.2)                          |         |
| Grip strength (kg)                      | 29.3 (23.8~36.5)           | 29.5 (24.9~36.2)                | 29.3 (23.5~36.7)                     | 0.13    |
| Grip strength group                     |                            |                                 |                                      |         |
| T1 [n (%)]                              | 1386 (33.5)                | 209 (29.4)                      | 1177 (34.3)                          | 0.01    |
| T2 [n (%)]                              | 1387 (33.5)                | 268 (37.7)                      | 1199 (32.6)                          |         |
| T3 [n (%)]                              | 1369 (33.1)                | 234 (32.9)                      | 1135 (33.1)                          |         |

|    |                                                     |                     |                     |                     |       |
|----|-----------------------------------------------------|---------------------|---------------------|---------------------|-------|
| 1  |                                                     |                     |                     |                     |       |
| 2  |                                                     |                     |                     |                     |       |
| 3  | Height (cm)                                         | 157.7 (152.0~163.8) | 157.9 (152.0~163.7) | 157.6 (152.0~163.9) | 0.64  |
| 4  | Weight (kg)                                         | 58 (51.3~65.5)      | 57.1 (50.8~65.1)    | 58.2 (51.4~65.7)    | 0.08  |
| 5  | Body mass index (kg/m <sup>2</sup> )                | 23.2 (21~25.7)      | 22.9 (20.8~25.4)    | 23.3 (21.1~25.8)    | 0.01  |
| 6  | Waist circumference (cm)                            | 84.4 (78.0~92.0)    | 83.6 (77.0~90.2)    | 84.8 (78.1~92.0)    | <0.01 |
| 7  | Systolic blood pressure (mmHg)                      | 127 (114~141)       | 128 (114~142)       | 127 (114~141)       | 0.72  |
| 8  | Diastolic blood pressure (mmHg)                     | 75 (67~83)          | 74 (66~83)          | 75 (67~83)          | 0.41  |
| 9  | Mean arterial pressure (mmHg)                       | 92 (83~102)         | 92 (83~103)         | 92 (84~102)         | 0.76  |
| 10 | Depression symptom [ <i>n</i> (%)]                  | 1904 (46.0)         | 319 (44.9)          | 1585 (46.2)         | 0.52  |
| 11 | Self-report hypertension [ <i>n</i> (%)]            | 887 (21.4)          | 157 (22.1)          | 730 (21.3)          | 0.63  |
| 12 | Self-report dyslipidemia [ <i>n</i> (%)]            | 333 (8.0)           | 58 (8.2)            | 275 (8.0)           | 0.90  |
| 13 | Self-report diabetes or HBG [ <i>n</i> (%)]         | 191 (4.6)           | 28 (3.9)            | 163 (4.8)           | 0.35  |
| 14 | Self-report arthritis or rheumatism [ <i>n</i> (%)] | 1345 (32.5)         | 235 (33.1)          | 1110 (32.4)         | 0.71  |
| 15 | Antihypertensive therapy [ <i>n</i> (%)]            | 664 (16.0)          | 119 (16.7)          | 545 (19.5)          | 0.57  |
| 16 | Lipid-lowering therapy [ <i>n</i> (%)]              | 187 (4.5)           | 37 (5.2)            | 150 (4.4)           | 0.33  |
| 17 | Hypoglycemic therapy [ <i>n</i> (%)]                | 127 (3.1)           | 19 (2.7)            | 108 (3.1)           | 0.50  |
| 18 | Therapy for arthritis or rheumatism [ <i>n</i> (%)] | 643 (15.5)          | 116 (16.3)          | 527 (15.4)          | 0.52  |
| 19 | Metabolic syndrome [ <i>n</i> (%)]                  | 1321 (31.9)         | 207 (29.1)          | 1114 (32.5)         | 0.08  |
| 20 | MetS scores                                         | -0.1 (-0.4~0.3)     | -0.1 (-0.5~0.3)     | 0 (-0.4~0.3)        | 0.02  |
| 21 | Metabolic syndrome components                       |                     |                     |                     |       |
| 22 | Central obesity [ <i>n</i> (%)]                     | 1726 (41.7)         | 264 (37.1)          | 1462 (42.6)         | <0.01 |
| 23 | Elevated blood pressure [ <i>n</i> (%)]             | 2099 (50.7)         | 368 (51.8)          | 1731 (50.5)         | 0.52  |
| 24 | Dyslipidemia [ <i>n</i> (%)]                        | 1595 (38.5)         | 278 (39.1)          | 1317 (38.4)         | 0.72  |
| 25 | Elevated blood glucose [ <i>n</i> (%)]              | 2456 (59.3)         | 383 (53.9)          | 2073 (60.4)         | <0.01 |
| 26 | Baseline non-MetS group                             |                     |                     |                     |       |
| 27 | MetS-free [ <i>n</i> (%)]                           | 2460 (59.4)         | 444 (62.4)          | 2016 (58.8)         |       |
| 28 | MetS-developed [ <i>n</i> (%)]                      | 361 (8.7)           | 60 (8.4)            | 301 (8.8)           |       |
| 29 | Baseline MetS group                                 |                     |                     |                     |       |
| 30 | MetS-recovery [ <i>n</i> (%)]                       | 499 (12.0)          | 64 (9.0)            | 435 (12.7)          |       |
| 31 | MetS-chronic [ <i>n</i> (%)]                        | 822 (19.8)          | 143 (20.1)          | 679 (19.8)          |       |

Data are *n* (%) or median (interquartile range); HDL: high density lipoprotein; hs-CRP: high-sensitivity C-reactive protein; eGFR: estimated glomerular filtration rate; MetS: metabolic syndrome.

grip strength is divided into T1, T2 and T3 groups by one-third percentile.

475

**Table 2. Multivariate logistic regression of rapid eGFR decline between study groups**

|                          | Model 1                 |                | Model 2                 |                |
|--------------------------|-------------------------|----------------|-------------------------|----------------|
|                          | Adjusted OR<br>(95% CI) | <i>P</i> value | Adjusted OR<br>(95% CI) | <i>P</i> value |
| Baseline MetS groups     |                         |                |                         |                |
| MetS-chronic             | ref                     |                | ref                     |                |
| MetS-recovery            | 0.68 (0.50-0.95)        | 0.02           | 0.64 (0.45-0.90)        | 0.01           |
| Baseline non-MetS groups |                         |                |                         |                |
| MetS-free                | ref                     |                | ref                     |                |



1  
2  
3  
4  
5  
6  
7  
8  
9  
10  
11  
12  
13  
14  
15  
16  
17  
18  
19  
20  
21  
22  
23  
24  
25  
26  
27  
28  
29  
30  
31  
32  
33  
34  
35  
36  
37  
38  
39  
40  
41  
42  
43  
44  
45  
46  
47  
48  
49  
50  
51  
52  
53  
54  
55  
56  
57  
58  
59  
60

|                |                  |      |                  |      |
|----------------|------------------|------|------------------|------|
| MetS-developed | 0.93 (0.69-1.25) | 0.64 | 1.00 (0.73-1.38) | 0.98 |
|----------------|------------------|------|------------------|------|

Model 1: additional adjusted for age and sex.

Model 2: additional adjusted for age, sex, serum creatinine, eGFR classification, grip strength classification, hemoglobin; MetS scores and body mass index.

eGFR: estimated glomerular filtration rate; CI: confidence interval; OR: odds ratio; MetS: metabolic syndrome.

476

**Table 3. Multivariate logistic regression of rapid eGFR decline between study groups according the changes of MetS components**

|                                                                                      | Model 1                 |                | Model 2                 |                |
|--------------------------------------------------------------------------------------|-------------------------|----------------|-------------------------|----------------|
|                                                                                      | Adjusted OR<br>(95% CI) | <i>P</i> value | Adjusted OR<br>(95% CI) | <i>P</i> value |
| Recovered components in baseline MetS groups (chronic MetS components as reference)  |                         |                |                         |                |
| Central obesity                                                                      | 0.29 (0.15-0.59)        | 0.01           | 0.31 (0.15-0.65)        | <0.01          |
| Elevated blood pressure                                                              | 0.80 (0.50-1.26)        | 0.33           | 0.79 (0.49-1.27)        | 0.33           |
| Elevated SBP                                                                         | 0.89 (0.61-1.31)        | 0.56           | 0.88 (0.59-1.30)        | 0.51           |
| Elevated DBP                                                                         | 0.75 (0.46-1.23)        | 0.26           | 0.68 (0.41-1.15)        | 0.15           |
| Dyslipidemia                                                                         | 1.09 (0.82-1.44)        | 0.57           | 1.05 (0.78-1.40)        | 0.77           |
| Elevated TG                                                                          | 1.22 (0.87-1.72)        | 0.26           | 1.14 (0.79-1.36)        | 0.50           |
| Decreased HDL                                                                        | 0.84 (0.59-1.12)        | 0.32           | 0.85 (0.59-1.22)        | 0.38           |
| Elevated blood glucose                                                               | 1.08 (0.87-1.34)        | 0.49           | 1.08 (0.86-1.36)        | 0.52           |
| Elevated fasting glucose                                                             | 1.14 (0.91-1.43)        | 0.25           | 1.13 (0.89-1.43)        | 0.32           |
| Developed components in baseline non-MetS groups (free MetS components as reference) |                         |                |                         |                |
| Central obesity                                                                      | 1.21 (0.92-1.59)        | 0.16           | 1.32 (0.97-1.77)        | 0.74           |
| Elevated blood pressure                                                              | 0.84 (0.63-1.13)        | 0.26           | 0.87 (0.64-1.18)        | 0.37           |
| Elevated SBP                                                                         | 0.88 (0.66-1.17)        | 0.37           | 0.92 (0.68-1.23)        | 0.56           |
| Elevated DBP                                                                         | 0.88 (0.62-1.24)        | 0.46           | 0.91 (0.63-1.30)        | 0.59           |
| Dyslipidemia                                                                         | 0.92 (0.69-1.22)        | 0.54           | 0.96 (0.72-1.30)        | 0.81           |
| Elevated TG                                                                          | 0.93 (0.70-1.25)        | 0.64           | 1.02 (0.75-1.37)        | 0.91           |
| Decreased HDL                                                                        | 1.02 (0.65-1.59)        | 0.95           | 0.97 (0.61-1.55)        | 0.91           |
| Elevated blood glucose                                                               | 1.07 (0.76-1.50)        | 0.71           | 1.07 (0.75-1.52)        | 0.71           |
| Elevated fasting glucose                                                             | 1.06 (0.74-1.51)        | 0.76           | 1.09 (0.76-1.57)        | 0.64           |

eGFR: estimated glomerular filtration rate; CI: confidence interval; OR: odds ratio; MetS: metabolic syndrome; SBP: systolic blood pressure; DBP: diastolic blood pressure; TG: triglyceride; HDL: high density lipoprotein.

Model 1: additional adjusted for age and sex.

Model 2: additional adjusted for age, sex, serum creatinine, eGFR classification, grip strength classification, hemoglobin, MetS score and body mass index.

Each MetS components run in their own model to predict rapid eGFR decline

477

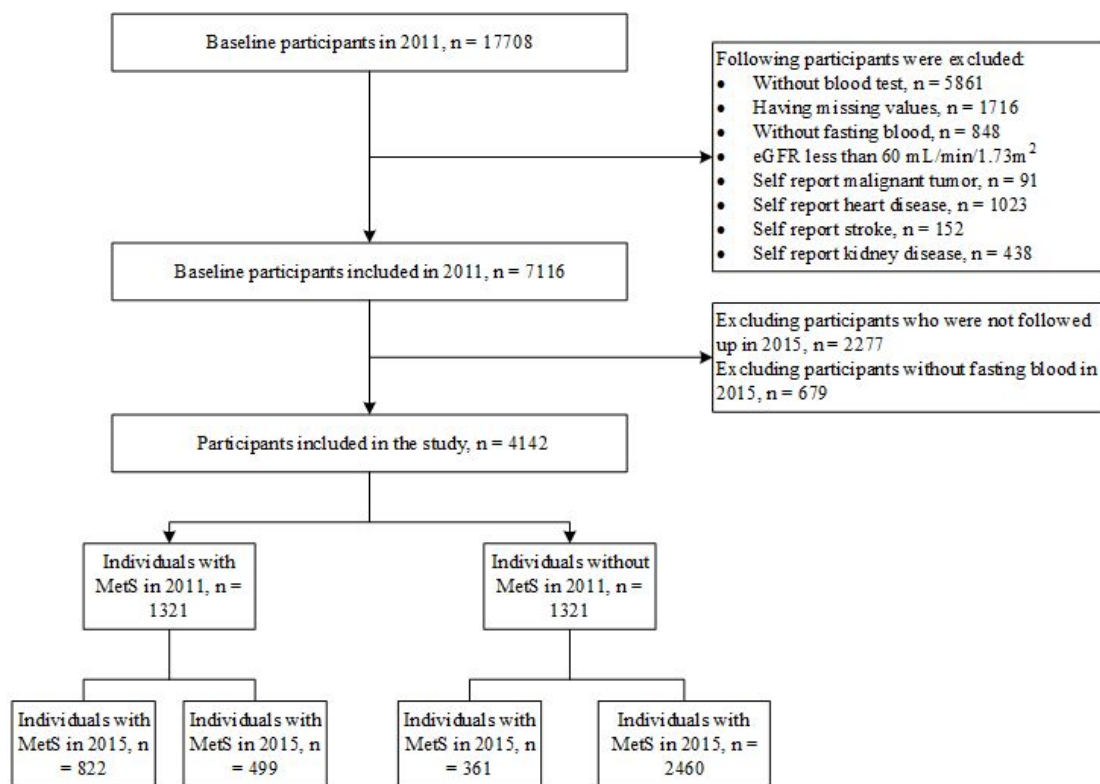

478

Fig 1. Flow chart of of participants selection. eGFR: estimated glomerular filtration rate; MetS: metabolic syndrome

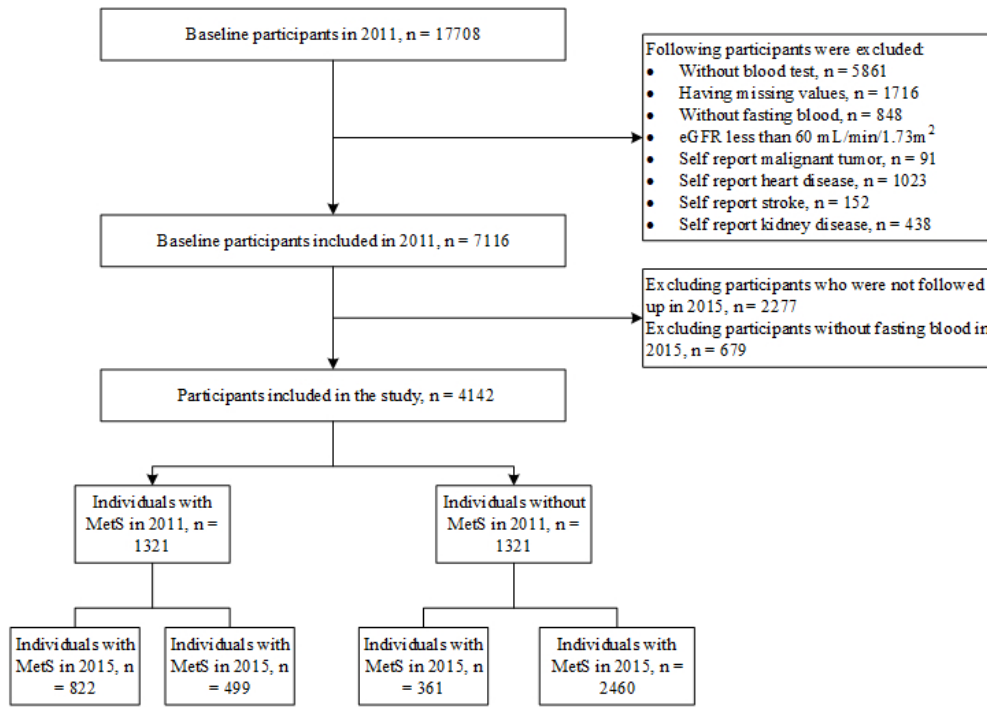

Fig 1. Flow chart of of participants selection. eGFR: estimated glomerular filtration rate; MetS: metabolic syndrome

Flow chart of of participants selection

193x148mm (96 x 96 DPI)

1  
2  
3  
4 **Association between recovery/occurrence of metabolic syndrome and rapid estimated**  
5 **glomerular filtration rate decline in middle-aged and older populations: evidence from**  
6  
7 **the China Health and Retirement Longitudinal Study**

8  
9 **Peijia Liu,<sup>1</sup> Leile Tang,<sup>2</sup> Jia fang,<sup>1</sup> Chaojin Chen,<sup>3\*</sup> Xun Liu<sup>1\*</sup>**

10  
11 <sup>1</sup>Department of Nephrology, The Third Affiliated Hospital of Sun Yat-Sen University,  
12  
13 Guangzhou, Guangdong, China;

14  
15 <sup>2</sup>Department of Cardiology, The Third Affiliated Hospital of Sun Yat-Sen University,  
16  
17 Guangzhou, Guangdong, China

18  
19 <sup>3</sup>Department of Anesthesiology, Third Affiliated Hospital of Sun Yat-sen University,  
20  
21 Guangzhou, Guangdong, China

22  
23  
24  
25 **\*Correspondence to**

26  
27 Dr Xun Liu;

28  
29 [naturestyle@163.com](mailto:naturestyle@163.com);

30  
31 Department of Nephrology,

32  
33 The Third Affiliated Hospital of Sun Yat-Sen University,

34  
35 Guangzhou, Guangdong, 510630, China

36  
37 &

38  
39 Dr Chaojin Chen;

40  
41 [chenchj28@mail.sysu.edu.cn](mailto:chenchj28@mail.sysu.edu.cn);

42  
43 Department of Anesthesiology,

44  
45 The Third Affiliated Hospital of Sun Yat-Sen University,

46  
47 Guangzhou, Guangdong, 510630, China

**Supplemental Table 1. Baseline characteristics of participants included and excluded in the study**

| Characteristics                         | participants included   |                     |                     | P-value |
|-----------------------------------------|-------------------------|---------------------|---------------------|---------|
|                                         | in baseline<br>(n=7116) | group 1<br>(n=2974) | group 2<br>(n=4142) |         |
| Age (years)                             | 58 (52~65)              | 58 (52~64)          | 58 (51~66)          | 0.98    |
| Male [ <i>n</i> (%)]                    | 3332 (46.8)             | 1458 (49.0)         | 1874 (45.2)         | 0.002   |
| Married with spouse [ <i>n</i> (%)]     | 5977 (84.0)             | 2974 (81.7)         | 3548 (87.5)         | <0.001  |
| Education                               |                         |                     |                     | 0.07    |
| Illiterate [ <i>n</i> (%)]              | 2106 (29.6)             | 900 (30.3)          | 1206 (29.1)         |         |
| Middle school and below [ <i>n</i> (%)] | 2853 (40.1)             | 1146 (38.5)         | 1770 (41.2)         |         |
| High school and above [ <i>n</i> (%)]   | 2157 (30.3)             | 928 (31.2)          | 1229 (29.7)         |         |
| Household per capita income (yuan)      | 6748 (2417~14298)       | 6461 (2337~13487)   | 7276 (2500~15600)   | 0.02    |
| Drink [ <i>n</i> (%)]                   | 2461 (34.6)             | 1054 (35.4)         | 1470 (32.2)         | 0.20    |
| Smoke [ <i>n</i> (%)]                   | 2775 (39.0)             | 1208 (40.6)         | 1567 (37.8)         | 0.02    |
| Blood urea nitrogen (mg/dl)             | 15.1 (12.52~17.90)      | 15.0 (12.5~17.8)    | 15.1 (12.8~18.0)    | 0.16    |
| Fasting glucose (mg/dl)                 | 102.4 (94.5~111.6)      | 102.4 (94.9~111.2)  | 102.1 (94.1~112.5)  | 0.72    |
| Creatinine (mg/dl)                      | 0.76 (0.64~0.86)        | 0.75 (0.64~0.85)    | 0.76 (0.66~0.88)    | <0.001  |
| Total cholesterol (mg/dl)               | 190.2 (168.2~215.3)     | 190.6 (168.6~215.7) | 189.8 (167.4~214.9) | 0.36    |
| Triglyceride (mg/dl)                    | 104.4 (74.34~147.8)     | 105.3 (74.34~148.7) | 104.4 (73.46~147.8) | 0.77    |
| HDL cholesterol (mg/dl)                 | 49.5 (41.0~59.9)        | 49.1 (41.0~59.5)    | 49.9 (41.4~60.3)    | 0.02    |
| hs-CRP (mg/l)                           | 1.03 (0.54~2.04)        | 1.02 (0.54~1.97)    | 1.04 (0.55~2.17)    | 0.62    |
| GHbA1c (%)                              | 5.1 (4.9~5.4)           | 5.1 (4.9~5.4)       | 5.1 (4.9~5.4)       | 0.65    |
| Uric acid (mg/dl)                       | 4.3 (3.6~5.1)           | 4.2 (3.5~5.0)       | 4.4 (3.6~5.1)       | <0.001  |
| Hemoglobin (mg/dl)                      | 14.2 (13.1~15.5)        | 14.2 (13.1~15.5)    | 14.2 (13.1~15.5)    | 0.75    |
| Height (cm)                             | 157.9 (152.0~164.1)     | 157.7 (152.0~163.8) | 157.9 (152~164.5)   | 0.74    |
| Weight (kg)                             | 57.7 (51.0~65.4)        | 58.0 (51.3~65.5)    | 57.5 (50.3~65.2)    | 0.01    |
| Waist (cm)                              | 84.3 (77.6~91.4)        | 84.4 (78.0~92.0)    | 84.0 (77.0~91.0)    | 0.08    |
| Body mass index (kg/m <sup>2</sup> )    | 23.1 (20.8~25.6)        | 23.2 (21.0~25.7)    | 22.9 (20.6~25.5)    | 0.01    |
| hand grip strength (kg)                 | 29.3 (23.5~36.5)        | 29.1 (23.0~36.5)    | 29.3 (23.8~36.5)    | 0.59    |
| Systolic blood pressure (mmHg)          | 127.3 (114.7~141.3)     | 127.0 (114.3~141.0) | 127.7 (115.3~142.0) | 0.32    |
| Diastolic blood pressure (mmHg)         | 74.7 (67.3~83.0)        | 74.7 (67.0~82.7)    | 75.0 (67.3~83.0)    | 0.34    |
| Mean arterial pressure (mmHg)           | 92.6 (83.7~102.0)       | 92.2 (83.4~101.7)   | 92.6 (84.0~102.6)   | 0.28    |
| eGFR (ml/min/1.73m <sup>2</sup> )       | 95.2 (85.5~102.7)       | 95.9 (86.4~102.9)   | 94.0 (84.3~102.3)   | <0.001  |
| Depression symptom [ <i>n</i> (%)]      | 3172 (44.6)             | 1268 (42.6)         | 1904 (46.0)         | 0.005   |
| Metabolic syndrome [ <i>n</i> (%)]      | 2228 (31.3)             | 907 (30.5)          | 1321 (31.9)         | 0.21    |
| Metabolic syndrome components           |                         |                     |                     |         |
| Elevated blood pressure [ <i>n</i> (%)] | 3622 (50.9)             | 1523 (51.2)         | 2099 (50.7)         | 0.66    |
| Elevated blood glucose [ <i>n</i> (%)]  | 4179 (58.7)             | 1723 (57.9)         | 2456 (59.3)         | 0.25    |
| Dyslipidemia [ <i>n</i> (%)]            | 2673 (37.6)             | 1078 (36.2)         | 1595 (38.5)         | 0.052   |
| Central obesity [ <i>n</i> (%)]         | 2862 (40.2)             | 1136 (38.2)         | 1726 (41.7)         | 0.003   |

Data are *n* (%) or median (interquartile range); HDL: high density lipoprotein; hs-CRP: high-sensitivity C-reactive protein; eGFR: estimated glomerular filtration rate; MetS: metabolic

1  
2  
3 syndrome. Group 1: participants included in the baseline and excluded after follow-up; Group 2:  
4 participants included in the study.  
5  
6  
7

8 **Supplemental Table 2. Univariate analysis of variables between eGFR decline group and non-**  
9 **rapid eGFR decline group**

| Characteristics                                 | Coef.   | 95% Conf.     | P-value |
|-------------------------------------------------|---------|---------------|---------|
| Sex (female as ref)                             | 0.200   | 0.038~0.362   | 0.02    |
| Age (years)                                     | 0.011   | 0.002~0.021   | 0.02    |
| Married status [ <i>n</i> (%)]                  |         |               |         |
| Other married status                            | ref     | ref           |         |
| Married with spouse                             | 0.013   | -0.218~0.245  | 0.91    |
| Education                                       |         |               |         |
| Illiterate                                      | ref     | ref           |         |
| Middle school and below                         | 0.160   | --0.037~0.359 | 0.11    |
| High school and above                           | 0.097   | -0.118~0.311  | 0.34    |
| Household per capita income (per 10000 yuan)    | 0.005   | -0.053~0.062  | 0.88    |
| Drink [ <i>n</i> (%)]                           |         |               |         |
| Smoke [ <i>n</i> (%)]                           | 0.022   | -0.145~0.188  | 0.80    |
| Blood urea nitrogen (mg/dl)                     | 0.019   | -0.001~0.038  | 0.06    |
| Fasting glucose (mg/dl)                         | -0.002  | -0.005~0.001  | 0.28    |
| Creatinine (mg/dl)                              | -1.818  | -2.368~-1.268 | <0.001  |
| Total cholesterol (mg/dl)                       | -0.001  | -0.004~0.001  | 0.21    |
| Triglyceride (mg/dl)                            | -0.0004 | -             | 0.39    |
| HDL cholesterol (mg/dl)                         | 0.007   | -0.005~0.006  | 0.80    |
| hs-CRP (mg/l)                                   | 0.004   | -0.013~0.020  | 0.66    |
| GHbA1c (%)                                      | -0.051  | -0.167~0.066  | 0.40    |
| Uric acid (mg/dl)                               | 0.003   | -0.066~0.072  | 0.93    |
| Hemoglobin (mg/dl)                              | -0.102  | -0.144~-0.060 | <0.001  |
| eGFR (ml/min/1.73m <sup>2</sup> )               | 0.023   | 0.017~0.030   | <0.001  |
| eGFR group                                      |         |               |         |
| 60~89 ml/min/1.73m <sup>2</sup> [ <i>n</i> (%)] | ref     | ref           |         |
| 90~ ml/min/1.73m <sup>2</sup> [ <i>n</i> (%)]   | 0.203   | 0.026~0.379   | 0.02    |
| Grip strength (kg)                              | 0.004   | -0.005~0.012  | 0.38    |
| Grip strength group                             |         |               |         |
| T1 [ <i>n</i> (%)]                              | ref     | ref           |         |
| T2 [ <i>n</i> (%)]                              | 0.311   | 0.112~0.511   | <0.01   |
| T3 [ <i>n</i> (%)]                              | 0.148   | -0.056~0.353  | 0.16    |
| Height (cm)                                     | 0.003   | -0.007~0.013  | 0.58    |
| Weight (kg)                                     | -0.008  | -0.015~0.000  | 0.048   |
| Body mass index (kg/m <sup>2</sup> )            | -0.032  | -0.056~-0.009 | 0.01    |

|    |                                                     |        |               |        |
|----|-----------------------------------------------------|--------|---------------|--------|
| 1  |                                                     |        |               |        |
| 2  |                                                     |        |               |        |
| 3  | Waist circumference (cm)                            | -0.012 | -0.018~-0.005 | <0.001 |
| 4  | Systolic blood pressure (mmHg)                      | 0.002  | -0.002~-0.006 | 0.33   |
| 5  | Diastolic blood pressure (mmHg)                     | -0.001 | -0.008~-0.005 | 0.76   |
| 6  | Mean arterial pressure (mmHg)                       | 0.001  | -0.005~-0.007 | 0.75   |
| 7  | Depression symptom [ <i>n</i> (%)]                  | -0.054 | -0.216~-0.109 | 0.52   |
| 8  | Self-report hypertension [ <i>n</i> (%)]            | 0.047  | -0.148~-0.243 | 0.63   |
| 9  | Self-report dyslipidemia [ <i>n</i> (%)]            | 0.019  | -0.276~-0.315 | 0.90   |
| 10 | Self-report diabetes or HBG [ <i>n</i> (%)]         | -0.196 | -0.065~-0.213 | 0.35   |
| 11 | Self-report arthritis or rheumatism [ <i>n</i> (%)] | -0.032 | -0.204~-0.140 | 0.71   |
| 12 | Antihypertensive therapy [ <i>n</i> (%)]            | 0.062  | -0.155~-0.280 | 0.57   |
| 13 | Lipid-lowering therapy [ <i>n</i> (%)]              | 0.183  | -0.186~-0.552 | 0.33   |
| 14 | Hypoglycemic therapy [ <i>n</i> (%)]                | -0.169 | -0.663~-0.326 | 0.50   |
| 15 | Therapy for arthritis or rheumatism [ <i>n</i> (%)] | 0.072  | -0.148~-0.291 | 0.52   |
| 16 | Metabolic syndrome [ <i>n</i> (%)]                  | -0.158 | -0.334~-0.019 | 0.08   |
| 17 | MetS scores                                         | -0.138 | -0.279~-0.003 | 0.055  |
| 18 | Metabolic syndrome components                       |        |               |        |
| 19 | Central obesity [ <i>n</i> (%)]                     | -0.229 | -0.395~-0.062 | 0.01   |
| 20 | Elevated blood pressure [ <i>n</i> (%)]             | 0.052  | -0.109~-0.214 | 0.53   |
| 21 | Dyslipidemia [ <i>n</i> (%)]                        | 0.030  | -0.135~-0.196 | 0.72   |
| 22 | Elevated blood glucose [ <i>n</i> (%)]              | -0.268 | -0.431~-0.105 | 0.001  |

23  
24  
25  
26  
27  
28  
29  
30  
31  
32  
33  
34  
35  
36  
37  
38  
39  
40  
41  
42  
43  
44  
45  
46  
47  
48  
49  
50  
51  
52  
53  
54  
55  
56  
57  
58  
59  
60

Data are *n* (%) or median (interquartile range); HDL: high density lipoprotein; hs-CRP: high-sensitivity C-reactive protein; eGFR:

estimated glomerular filtration rate; MetS: metabolic syndrome.

grip strength is divided into T1, T2 and T3 groups by one-third percentile.

## STROBE Statement—checklist of items that should be included in reports of observational studies

|                              | Item No | Recommendation                                                                                                                                                                                                                                                                                                                              |
|------------------------------|---------|---------------------------------------------------------------------------------------------------------------------------------------------------------------------------------------------------------------------------------------------------------------------------------------------------------------------------------------------|
| <b>Title and abstract</b>    | 1-3     | (a) Indicate the study's design with a commonly used term in the title or the abstract<br>(b) Provide in the abstract an informative and balanced summary of what was done and what was found                                                                                                                                               |
| <b>Introduction</b>          |         |                                                                                                                                                                                                                                                                                                                                             |
| Background/rationale         | 4       | Explain the scientific background and rationale for the investigation being reported                                                                                                                                                                                                                                                        |
| Objectives                   | 4-5     | State specific objectives, including any prespecified hypotheses                                                                                                                                                                                                                                                                            |
| <b>Methods</b>               |         |                                                                                                                                                                                                                                                                                                                                             |
| Study design                 |         | Present key elements of study design early in the paper                                                                                                                                                                                                                                                                                     |
| Setting                      |         | Describe the setting, locations, and relevant dates, including periods of recruitment, exposure, follow-up, and data collection                                                                                                                                                                                                             |
| Participants                 | 5       | (a) <i>Cohort study</i> —Give the eligibility criteria, and the sources and methods of selection of participants.                                                                                                                                                                                                                           |
| Data sources/<br>measurement | 5-6*    | For each variable of interest, give sources of data and details of methods of assessment (measurement). Describe comparability of assessment methods if there is more than one group                                                                                                                                                        |
| Variables                    | 6-8     | Clearly define all outcomes, exposures, predictors, potential confounders, and effect modifiers. Give diagnostic criteria, if applicable                                                                                                                                                                                                    |
| Bias                         |         | Describe any efforts to address potential sources of bias                                                                                                                                                                                                                                                                                   |
| Study size                   |         | Explain how the study size was arrived at                                                                                                                                                                                                                                                                                                   |
| Quantitative variables       |         | Explain how quantitative variables were handled in the analyses. If applicable, describe which groupings were chosen and why                                                                                                                                                                                                                |
| Statistical methods          | 8-9     | (a) Describe all statistical methods, including those used to control for confounding<br>(b) Describe any methods used to examine subgroups and interactions<br>(c) Explain how missing data were addressed<br>(d) <i>Cohort study</i> —If applicable, explain how loss to follow-up was addressed<br>(e) Describe any sensitivity analyses |
| <b>Results</b>               |         |                                                                                                                                                                                                                                                                                                                                             |
| Participants                 | 9*      | (a) Report numbers of individuals at each stage of study—eg numbers potentially eligible, examined for eligibility, confirmed eligible, included in the study, completing follow-up, and analysed<br>(b) Give reasons for non-participation at each stage<br>(c) Consider use of a flow diagram                                             |
| Descriptive data             | 10*     | (a) Give characteristics of study participants (eg demographic, clinical, social) and information on exposures and potential confounders<br>(b) Indicate number of participants with missing data for each variable of interest<br>(c) <i>Cohort study</i> —Summarise follow-up time (eg, average and total amount)                         |
| Outcome data                 | 10*     | <i>Cohort study</i> —Report numbers of outcome events or summary measures over time<br><i>Case-control study</i> —Report numbers in each exposure category, or summary measures of exposure<br><i>Cross-sectional study</i> —Report numbers of outcome events or summary measures                                                           |
| Main results                 | 10      | (a) Give unadjusted estimates and, if applicable, confounder-adjusted estimates and their precision (eg, 95% confidence interval). Make clear which confounders were adjusted for and why they were included                                                                                                                                |



(b) Report category boundaries when continuous variables were categorized

(c) If relevant, consider translating estimates of relative risk into absolute risk for a meaningful time period

|                          |       |                                                                                                                                                                            |
|--------------------------|-------|----------------------------------------------------------------------------------------------------------------------------------------------------------------------------|
| Other analyses           | 10-11 | Report other analyses done—eg analyses of subgroups and interactions, and sensitivity analyses                                                                             |
| <b>Discussion</b>        |       |                                                                                                                                                                            |
| Key results              | 11    | Summarise key results with reference to study objectives                                                                                                                   |
| Limitations              | 12-13 | Discuss limitations of the study, taking into account sources of potential bias or imprecision. Discuss both direction and magnitude of any potential bias                 |
| Interpretation           | 11-13 | Give a cautious overall interpretation of results considering objectives, limitations, multiplicity of analyses, results from similar studies, and other relevant evidence |
| Generalisability         | 13    | Discuss the generalisability (external validity) of the study results                                                                                                      |
| <b>Other information</b> |       |                                                                                                                                                                            |
| Funding                  | 13    | Give the source of funding and the role of the funders for the present study and, if applicable, for the original study on which the present article is based              |

\*Give information separately for cases and controls in case-control studies and, if applicable, for exposed and unexposed groups in cohort and cross-sectional studies.

**Note:** An Explanation and Elaboration article discusses each checklist item and gives methodological background and published examples of transparent reporting. The STROBE checklist is best used in conjunction with this article (freely available on the Web sites of PLoS Medicine at <http://www.plosmedicine.org/>, Annals of Internal Medicine at <http://www.annals.org/>, and Epidemiology at <http://www.epidem.com/>). Information on the STROBE Initiative is available at [www.strobe-statement.org](http://www.strobe-statement.org).

# BMJ Open

## Association between recovery/occurrence of metabolic syndrome and rapid estimated glomerular filtration rate decline in middle-aged and older populations: evidence from the China Health and Retirement Longitudinal Study

|                                 |                                                                                                                                                                                                                                                                                                                                                                                                                                                                                                                                                   |
|---------------------------------|---------------------------------------------------------------------------------------------------------------------------------------------------------------------------------------------------------------------------------------------------------------------------------------------------------------------------------------------------------------------------------------------------------------------------------------------------------------------------------------------------------------------------------------------------|
| Journal:                        | <i>BMJ Open</i>                                                                                                                                                                                                                                                                                                                                                                                                                                                                                                                                   |
| Manuscript ID                   | bmjopen-2021-059504.R2                                                                                                                                                                                                                                                                                                                                                                                                                                                                                                                            |
| Article Type:                   | Original research                                                                                                                                                                                                                                                                                                                                                                                                                                                                                                                                 |
| Date Submitted by the Author:   | 06-Aug-2022                                                                                                                                                                                                                                                                                                                                                                                                                                                                                                                                       |
| Complete List of Authors:       | Liu, Peijia; Third Affiliated Hospital of Sun Yat-Sen University, Department of Nephrology; Guangzhou Eighth People's Hospital, Guangzhou Medical University, Department of Nephrology<br>Tang, Leile; Third Affiliated Hospital of Sun Yat-Sen University, Department of Cardiology<br>Fang, Jia; Third Affiliated Hospital of Sun Yat-Sen University, Department of Nephrology<br>Chen, Chaojin; Third Affiliated Hospital of Sun Yat-Sen University<br>Liu, Xun; Third Affiliated Hospital of Sun Yat-Sen University, Department of Nephrology |
| <b>Primary Subject Heading</b>: | Nutrition and metabolism                                                                                                                                                                                                                                                                                                                                                                                                                                                                                                                          |
| Secondary Subject Heading:      | Urology, Diabetes and endocrinology, Public health                                                                                                                                                                                                                                                                                                                                                                                                                                                                                                |
| Keywords:                       | Chronic renal failure < NEPHROLOGY, Lipid disorders < DIABETES & ENDOCRINOLOGY, PUBLIC HEALTH                                                                                                                                                                                                                                                                                                                                                                                                                                                     |
|                                 |                                                                                                                                                                                                                                                                                                                                                                                                                                                                                                                                                   |

SCHOLARONE™  
Manuscripts



I, the Submitting Author has the right to grant and does grant on behalf of all authors of the Work (as defined in the below author licence), an exclusive licence and/or a non-exclusive licence for contributions from authors who are: i) UK Crown employees; ii) where BMJ has agreed a CC-BY licence shall apply, and/or iii) in accordance with the terms applicable for US Federal Government officers or employees acting as part of their official duties; on a worldwide, perpetual, irrevocable, royalty-free basis to BMJ Publishing Group Ltd ("BMJ") its licensees and where the relevant Journal is co-owned by BMJ to the co-owners of the Journal, to publish the Work in this journal and any other BMJ products and to exploit all rights, as set out in our [licence](#).

The Submitting Author accepts and understands that any supply made under these terms is made by BMJ to the Submitting Author unless you are acting as an employee on behalf of your employer or a postgraduate student of an affiliated institution which is paying any applicable article publishing charge ("APC") for Open Access articles. Where the Submitting Author wishes to make the Work available on an Open Access basis (and intends to pay the relevant APC), the terms of reuse of such Open Access shall be governed by a Creative Commons licence – details of these licences and which [Creative Commons](#) licence will apply to this Work are set out in our licence referred to above.

Other than as permitted in any relevant BMJ Author's Self Archiving Policies, I confirm this Work has not been accepted for publication elsewhere, is not being considered for publication elsewhere and does not duplicate material already published. I confirm all authors consent to publication of this Work and authorise the granting of this licence.

1  
2  
3  
4 1 **Association between recovery/occurrence of metabolic syndrome and rapid**  
5  
6 2 **estimated glomerular filtration rate decline in middle-aged and older**  
7  
8 3 **populations: evidence from the China Health and Retirement Longitudinal**  
9  
10 4 **Study**

11  
12 5 **Peijia Liu,<sup>1,2</sup> Leile Tang,<sup>3</sup> Jia fang,<sup>1</sup> Chaojin Chen,<sup>4\*</sup> Xun Liu<sup>1\*</sup>**

13  
14 6 <sup>1</sup>Department of Nephrology, The Third Affiliated Hospital of Sun Yat-Sen University,  
15  
16 7 Guangzhou, Guangdong, China;

17  
18 8 <sup>2</sup>Department of Nephrology, The Eighth People's Hospital of Guangzhou,  
19  
20 9 Guangzhou, Guangdong, China;

21  
22 10 <sup>3</sup>Department of Cardiology, The Third Affiliated Hospital of Sun Yat-Sen University,  
23  
24 11 Guangzhou, Guangdong, China

25  
26 12 <sup>4</sup>Department of Anesthesiology, Third Affiliated Hospital of Sun Yat-sen University,  
27  
28 13 Guangzhou, Guangdong, China

29  
30  
31  
32 15 **\*Correspondence to**

33  
34 16 Dr Xun Liu;

35  
36 17 [naturestyle@163.com](mailto:naturestyle@163.com);

37  
38 18 Department of Nephrology,

39  
40 19 The Third Affiliated Hospital of Sun Yat-Sen University,

41  
42 20 Guangzhou, Guangdong, 510630, China

43  
44 21 &

45  
46 22 Dr Chaojin Chen;

47  
48 23 [chenchj28@mail.sysu.edu.cn](mailto:chenchj28@mail.sysu.edu.cn);

49  
50 24 Department of Anesthesiology,

51  
52 25 The Third Affiliated Hospital of Sun Yat-Sen University,

53  
54 26 Guangzhou, Guangdong, 510630, China

1  
2  
3  
4 27 **Abstract**

5  
6 28 **Objectives** Few studies have explored correlations between metabolic syndrome  
7  
8 29 (MetS) alterations and renal deterioration in longitudinal cohorts. We aim to  
9  
10 30 investigate associations between MetS recovery/development and rapid estimated  
11  
12 31 glomerular filtration rate (eGFR) decline in the China Health and Retirement  
13  
14 32 Longitudinal Study (CHARLS).

15  
16 33 **Design** Longitudinal cohort study.

17  
18 34 **Setting** This study is a secondary analysis of CHARLS.

19  
20 35 **Participants** After excluding individuals with age < 45 years old, eGFR < 60  
21  
22 36 ml/min/1.73m<sup>2</sup> and clinician-reported malignant tumor, heart disease, stroke or kidney  
23  
24 37 disease at baseline, 4142 participants with complete data were selected from the  
25  
26 38 CHARLS during the 4-year follow-up period (2011-2015).

27  
28 39 **Outcome measures** MetS were measured at 2011 and 2015 in CHARLS. A rapid  
29  
30 40 eGFR decline was defined as an average annual eGFR decline of > 3 ml/min/1.73m<sup>2</sup>.  
31  
32 41 The associations between rapid eGFR decline and MetS recovery/development were  
33  
34 42 analyzed using multivariable adjusted logistic models.

35  
36 43 **Results** According to MetS baseline status and follow-up, participants were divided  
37  
38 44 into four groups: (1) 2460 (59.4%) in the MetS-free group, (2) 361 (8.7%) in the  
39  
40 45 MetS-developed group, (3) 499 (12.0%) in the MetS recovery-group, and (4) 822  
41  
42 46 (19.8%) in the MetS-chronic group. When compared with the MetS-chronic group,  
43  
44 47 the multivariable adjusted odds ratio (OR) of rapid eGFR decline in the  
45  
46 48 MetS-recovery group was 0.64 (OR: 0.64; 95% confidence interval (CI): 0.45–0.90, *P*  
47  
48 49 = 0.01). In contrast, when compared with the MetS-free group, the multivariable  
49  
50 50 adjusted OR of rapid eGFR decline in the MetS-developed group was 1.00 (OR: 1.00;  
51  
52 51 95% CI: 0.73–1.38, *P* = 0.98).

53  
54 52 **Conclusions** Over the 4-year follow-up period, we found that MetS recovery was  
55  
56 53 associated with a reduced risk of rapid eGFR decline in middle-aged and older adults,  
57  
58 54 while MetS occurrence was not related to rapid eGFR decline. Recovery from MetS  
59  
60

1  
2  
3  
4 55 appeared to protect against a rapid decline in eGFR.

5  
6 56 **Keywords:** chronic renal failure; lipid disorders; public health;

7  
8 57

9  
10 58 **Strength and limitation of this study**

11  
12 59 This study investigated the association between altered metabolic syndrome  
13  
14 60 status and rapid glomerular filtration rate decline in a nationwide cohort.

15  
16 61 Metabolic syndrome scores were applied to evaluate the metabolic syndrome  
17  
18 62 severity.

19  
20 63 Blood tests related to metabolic syndrome and serum creatinine were performed  
21  
22 64 only once.

## 65 Introduction

66 Metabolic Syndrome (MetS) is a cluster of clinical characteristics related to  
67 abdominal obesity, dyslipidemia, elevated blood glucose (BG), and elevated blood  
68 pressure (BP)<sup>1-3</sup>. As of 2017, there were approximately 1 billion individuals with  
69 MetS around the world, of which China accounted for 21.7%<sup>4</sup>. In China, MetS  
70 prevalence has been undergoing a steady increase, concomitant with an increasingly  
71 aged population, an obesity epidemic, and increased diabetes and hypertension levels,  
72 which collectively pose a considerable threat to people's health and impose a heavy  
73 burden on healthcare systems<sup>4-6</sup>.

74 While investigations of causality relationships between MetS and cardiovascular  
75 events have gained considerable traction in recent years<sup>7-9</sup>, MetS also impacts the  
76 kidneys. It is accepted that the pathological mechanisms underpinning MetS mainly  
77 include insulin resistance, increased oxidative stress, and a chronic inflammatory  
78 state, which may lead to kidney degeneration and chronic kidney disease (CKD)  
79 development<sup>5,6</sup>. Previously, it was confirmed that MetS and associated components  
80 (abdominal obesity, elevated BG, elevated BP, and lipid metabolic disorder) are  
81 strongly related to CKD and a decreased estimated glomerular filtration rate (eGFR)  
82<sup>10-14</sup>. Several longitudinal studies reported that MetS and its components were  
83 associated with incremental rapid eGFR decline and CKD incidence<sup>15-18</sup>. However,  
84 these studies failed to articulate the relationship between MetS alterations and renal  
85 function changes. This dearth of information on this subject warrants further study,  
86 especially within a Chinese population context.

87 The China Health and Retirement Longitudinal Study (CHARLS) is a prospective  
88 cohort study conducted by the National School of Development, Peking University,  
89 China<sup>19</sup>. The nationwide sample assesses the social, behavioral, and health status of  
90 individuals aged 45 and older<sup>19</sup>. The CHARLS baseline survey was implemented in  
91 2011 (Wave 1), and the samples were followed up every two years. Blood samples  
92 from populations were only collected in 2011 (Wave1) and 2015 (Wave 3). In the

1  
2  
3  
4 93 current study, we explored the relationship between MetS recovery/occurrence and  
5  
6 94 rapid eGFR decline in middle-aged and older populations in the 4-year follow-up  
7  
8 95 cohort.

## 96 **Methods**

### 97 **Study population**

98 CHARLS is a nationally representative longitudinal survey on the social,  
99 economic, and health status of Chinese citizens aged  $\geq 45$  and their spouses in the  
100 community<sup>19</sup>. In total, 17,708 participants were registered at baseline (Wave 1 at  
101 2011), of which 11,847 had blood sample tests.

102 In this study, our exclusion criteria excluded participants with the following: 1)  
103 missing values; 2) without fasting blood values; 3) baseline eGFR  $< 60$   
104 ml/min/1.73m<sup>2</sup>; 4) clinician-reported malignant tumor, heart disease, stroke or kidney  
105 disease; 5)  $< 45$  years old; and 6) no follow-up records and related blood  
106 examinations in Wave 3 at 2015. After applying these criteria, 4142 participants were  
107 finally included. The participant screening process is outlined (Fig. 1).

108 The Medical Ethics Review Committee of Peking University approved this study.  
109 All participants provided written informed consent before participating. This study is  
110 a secondary analysis of a public dataset and does not require ethics approval again.

### 111 **Blood examinations**

112 At baseline (Wave 1), blood measurements and hemoglobin were assayed by the  
113 Center for Disease Control and Prevention of the local county, whereas other  
114 biochemical indicators were analyzed by Youanmen Center for Clinical Laboratory of  
115 Capital Medical University, Beijing, China. Serum creatinine (Scr) was measured by  
116 the picric acid method; blood urea nitrogen (BUN) was determined by an enzymatic  
117 UV method with urease; blood glucose (BG), total cholesterol, high density  
118 lipoprotein (HDL) cholesterol, and triglyceride (TG) were assayed by enzymatic  
119 colorimetric tests; glycosylated hemoglobin (GHbA1c) was determined by high  
120 performance liquid chromatography; high-sensitivity C-reactive protein (hs-CRP) was



1  
2  
3  
4 121 examined by immunoturbidimetric assay; and uric acid (UA) was determined by the  
5  
6 122 UA plus method <sup>20</sup>. Blood specimen testing in 2015 (Wave 3) was completed by  
7  
8 123 KingMed Diagnostics, the leading third-party institution in China, which has testing  
9  
10 124 laboratories in 27 provincial-level cities nationwide. GHbA1c, Scr, HDL, TG and BG  
11  
12 125 were the required blood biomarkers from Wave 3. GHbA1c and Scr levels were  
13  
14 126 determined by the same methods as Wave 1, while HDL was determined by a direct  
15  
16 127 method, TG by an oxidase method, and BG by a hexokinase method <sup>21</sup>. The  
17  
18 128 collection, storage, transport, processing, and other blood sample details are described  
19  
20 129 elsewhere <sup>20 21</sup>. Of note, the models and manufacturer information of blood test  
21  
22 130 instruments in Wave 1 and Wave 3 were not available. All inspections and  
23  
24 131 calibrations were performed by trained personnel.

### 132 **Definition and grouping of MetS**

133 Currently, there was no unified definition for MetS. The World Health  
134  
135  
136  
137  
138  
139  
140  
141  
142  
143  
144  
145  
146  
147  
148  
149  
150  
151  
152  
153  
154  
155  
156  
157  
158  
159  
160  
161  
162  
163  
164  
165  
166  
167  
168  
169  
170  
171  
172  
173  
174  
175  
176  
177  
178  
179  
180  
181  
182  
183  
184  
185  
186  
187  
188  
189  
190  
191  
192  
193  
194  
195  
196  
197  
198  
199  
200  
201  
202  
203  
204  
205  
206  
207  
208  
209  
210  
211  
212  
213  
214  
215  
216  
217  
218  
219  
220  
221  
222  
223  
224  
225  
226  
227  
228  
229  
230  
231  
232  
233  
234  
235  
236  
237  
238  
239  
240  
241  
242  
243  
244  
245  
246  
247  
248  
249  
250  
251  
252  
253  
254  
255  
256  
257  
258  
259  
260  
261  
262  
263  
264  
265  
266  
267  
268  
269  
270  
271  
272  
273  
274  
275  
276  
277  
278  
279  
280  
281  
282  
283  
284  
285  
286  
287  
288  
289  
290  
291  
292  
293  
294  
295  
296  
297  
298  
299  
300  
301  
302  
303  
304  
305  
306  
307  
308  
309  
310  
311  
312  
313  
314  
315  
316  
317  
318  
319  
320  
321  
322  
323  
324  
325  
326  
327  
328  
329  
330  
331  
332  
333  
334  
335  
336  
337  
338  
339  
340  
341  
342  
343  
344  
345  
346  
347  
348  
349  
350  
351  
352  
353  
354  
355  
356  
357  
358  
359  
360  
361  
362  
363  
364  
365  
366  
367  
368  
369  
370  
371  
372  
373  
374  
375  
376  
377  
378  
379  
380  
381  
382  
383  
384  
385  
386  
387  
388  
389  
390  
391  
392  
393  
394  
395  
396  
397  
398  
399  
400  
401  
402  
403  
404  
405  
406  
407  
408  
409  
410  
411  
412  
413  
414  
415  
416  
417  
418  
419  
420  
421  
422  
423  
424  
425  
426  
427  
428  
429  
430  
431  
432  
433  
434  
435  
436  
437  
438  
439  
440  
441  
442  
443  
444  
445  
446  
447  
448  
449  
450  
451  
452  
453  
454  
455  
456  
457  
458  
459  
460  
461  
462  
463  
464  
465  
466  
467  
468  
469  
470  
471  
472  
473  
474  
475  
476  
477  
478  
479  
480  
481  
482  
483  
484  
485  
486  
487  
488  
489  
490  
491  
492  
493  
494  
495  
496  
497  
498  
499  
500  
501  
502  
503  
504  
505  
506  
507  
508  
509  
510  
511  
512  
513  
514  
515  
516  
517  
518  
519  
520  
521  
522  
523  
524  
525  
526  
527  
528  
529  
530  
531  
532  
533  
534  
535  
536  
537  
538  
539  
540  
541  
542  
543  
544  
545  
546  
547  
548  
549  
550  
551  
552  
553  
554  
555  
556  
557  
558  
559  
560  
561  
562  
563  
564  
565  
566  
567  
568  
569  
570  
571  
572  
573  
574  
575  
576  
577  
578  
579  
580  
581  
582  
583  
584  
585  
586  
587  
588  
589  
590  
591  
592  
593  
594  
595  
596  
597  
598  
599  
600  
601  
602  
603  
604  
605  
606  
607  
608  
609  
610  
611  
612  
613  
614  
615  
616  
617  
618  
619  
620  
621  
622  
623  
624  
625  
626  
627  
628  
629  
630  
631  
632  
633  
634  
635  
636  
637  
638  
639  
640  
641  
642  
643  
644  
645  
646  
647  
648  
649  
650  
651  
652  
653  
654  
655  
656  
657  
658  
659  
660  
661  
662  
663  
664  
665  
666  
667  
668  
669  
670  
671  
672  
673  
674  
675  
676  
677  
678  
679  
680  
681  
682  
683  
684  
685  
686  
687  
688  
689  
690  
691  
692  
693  
694  
695  
696  
697  
698  
699  
700  
701  
702  
703  
704  
705  
706  
707  
708  
709  
710  
711  
712  
713  
714  
715  
716  
717  
718  
719  
720  
721  
722  
723  
724  
725  
726  
727  
728  
729  
730  
731  
732  
733  
734  
735  
736  
737  
738  
739  
740  
741  
742  
743  
744  
745  
746  
747  
748  
749  
750  
751  
752  
753  
754  
755  
756  
757  
758  
759  
760  
761  
762  
763  
764  
765  
766  
767  
768  
769  
770  
771  
772  
773  
774  
775  
776  
777  
778  
779  
780  
781  
782  
783  
784  
785  
786  
787  
788  
789  
790  
791  
792  
793  
794  
795  
796  
797  
798  
799  
800  
801  
802  
803  
804  
805  
806  
807  
808  
809  
810  
811  
812  
813  
814  
815  
816  
817  
818  
819  
820  
821  
822  
823  
824  
825  
826  
827  
828  
829  
830  
831  
832  
833  
834  
835  
836  
837  
838  
839  
840  
841  
842  
843  
844  
845  
846  
847  
848  
849  
850  
851  
852  
853  
854  
855  
856  
857  
858  
859  
860  
861  
862  
863  
864  
865  
866  
867  
868  
869  
870  
871  
872  
873  
874  
875  
876  
877  
878  
879  
880  
881  
882  
883  
884  
885  
886  
887  
888  
889  
890  
891  
892  
893  
894  
895  
896  
897  
898  
899  
900  
901  
902  
903  
904  
905  
906  
907  
908  
909  
910  
911  
912  
913  
914  
915  
916  
917  
918  
919  
920  
921  
922  
923  
924  
925  
926  
927  
928  
929  
930  
931  
932  
933  
934  
935  
936  
937  
938  
939  
940  
941  
942  
943  
944  
945  
946  
947  
948  
949  
950  
951  
952  
953  
954  
955  
956  
957  
958  
959  
960  
961  
962  
963  
964  
965  
966  
967  
968  
969  
970  
971  
972  
973  
974  
975  
976  
977  
978  
979  
980  
981  
982  
983  
984  
985  
986  
987  
988  
989  
990  
991  
992  
993  
994  
995  
996  
997  
998  
999  
1000

1  
2  
3  
4 149 fasting TG  $\geq$  150 mg/dL, or HDL  $\leq$  40 mg/dL, or diagnosed as dyslipidemia and  
5  
6 150 treated; and 4) Elevated BG: Fasting BG (FBG)  $\geq$  100 mg/dL, or 2 h postprandial BG  
7  
8 151  $\geq$  100 mg/dL, or diagnosed as diabetes and treated<sup>2</sup>. Diabetes was defined as fasting  
9  
10 152 BG  $\geq$  126 mg/dL, and/or HbA1c  $\geq$  6.5%, and/or a self-reported history of diabetes<sup>23</sup>.  
11  
12 153 Of note, we did not have 2 h postprandial BG data.

13  
14 154 According to MetS baseline status and follow-up, participants were categorized  
15  
16 155 into 1) MetS-free, 2) MetS-developed, 3) MetS-recovery, and 4) MetS-chronic  
17  
18 156 groups.

### 19 20 157 **Study outcomes**

21  
22 158 We calculated eGFR values using the 2012 Chronic Kidney Disease  
23  
24 159 Epidemiology Collaboration equation based on creatinine levels<sup>24</sup>. A rapid eGFR  
25  
26 160 decline was defined as an average annual eGFR decline of  $> 3$  ml/min/1.73m<sup>2</sup><sup>16 25</sup>. In  
27  
28 161 this study, we defined a rapid eGFR decline as the eGFR in Wave 3 minus the eGFR  
29  
30 162 in Wave 1,  $> 12$  ml/min/1.73m<sup>2</sup>.

### 31 32 163 **MetS scores**

33  
34 164 MetS severity potentially affects the recovery or occurrence of MetS. For  
35  
36 165 instance, individuals with high MetS severity may be less liable to recover. Similarly,  
37  
38 166 for those without MetS, it is not straightforward to progress to severe MetS.  
39  
40 167 Therefore, MetS scores were introduced to assess MetS severity in the study, which  
41  
42 168 was thought to be more sufficient and accurate than other ways using the number of  
43  
44 169 symptoms and complications to reflect MetS severity<sup>26 27</sup>. These scores were  
45  
46 170 calculated using principal component (PC) analysis of WC, mean arterial pressure  
47  
48 171 (MAP), FBG, fasting TG, and the inverse HDL values. All MetS related variables  
49  
50 172 were normalized by 0–1. According to the PC analysis results, PC1 and PC2  
51  
52 173 explained 38.9% and 20.9% of the variance, respectively. MetS scores were  
53  
54 174 calculated as follows:

55  
56  
57 175 
$$PC1 = 0.369 \times WC + 0.378 \times FBG + 0.585 \times TG + 0.562 \times \left( \frac{1}{HDL} \right) + 0.252 \times MAP,$$

$$PC2 = 0.503 \times WC - 0.171 \times FBG - 0.268 \times TG - 0.274 \times \left( \frac{1}{HDL} \right) + 0.755 \times MAP,$$

$$MetS \text{ score} = 0.389 \times PC1 + 0.209 \times PC2$$

### 178 **Other covariates**

179 All potential covariates were all collected at baseline in Wave 1, including gender  
180 (male vs. female), age, marital status (married with spouse vs. others), education  
181 (illiterate, middle school and below, or high school and above), household per capita  
182 income, smoking (yes vs. no), drinking (yes vs. no), eGFR, grip strength, height,  
183 weight, body mass index (BMI), WC, SBP, DBP, MAP, depressive symptom (yes vs.  
184 no), self-reporting disease (hypertension, diabetes, dyslipidemia and ), and  
185 corresponding medication. We categorized eGFR into two groups: 60–89 and  $\geq 90$ .  
186 Grip strength was divided into three groups (T1, T2, and T3) according to the  
187 one-third percentile. BMI was calculated by weight (kg)/height squared (m<sup>2</sup>). The BP  
188 of each participant was measured three times every 45–60 s with the Omron<sup>TM</sup>  
189 HEM-7112 sphygmomanometer (Omron Co. LTD, Dalian, China) at rest. Both SBP  
190 and DBP were averaged from three measurements. MAP was defined as  $MAP = 1/3 \times$   
191  $SBP + 2/3 \times DBP$ . Previous study demonstrated that depressive symptom was  
192 association with baseline eGFR<sup>28</sup>. Thus, we should not overlook this variable. The  
193 10-item Center for Epidemiological Studies Depression Scale (CESD-10) was applied  
194 in the study<sup>29</sup>. A CESD-10 score  $\geq 10$  was grouped into the depressive symptom  
195 group, and  $< 10$  into the non-depressive symptom group. Self-reporting disease was  
196 disease diagnosed by a doctor. Medical interventions included taking Chinese  
197 traditional and Western modern medicines.

### 198 **Statistical methods**

199 The Kolmogorov-Smirnov test was used to test the normality of continuous  
200 variables. Continuous variables were expressed by the median (interquartile range)  
201 and categorical variables by frequency (%). The Mann-Whitney U test was performed  
202 on continuous variables, and categorical variables between the rapid eGFR decline  
203 group and the non-rapid eGFR decline group were tested by the Chi-square test. In

1  
2  
3  
4 204 preliminary analyses, variables with P values < 0.15 were used to calibrate the logistic  
5  
6 205 model. Continuous variables not presenting a linear relationship with the logit  
7  
8 206 conversion value of the dependent variable were converted to categorical variables.  
9  
10 207 Tolerance and variance inflation factors (VIFs) were used to test for collinearity. This  
11  
12 208 existed if the tolerance was < 0.1 or the VIF was > 10. Eventually, age, sex, BMI, Scr,  
13  
14 209 hemoglobin, eGFR classification, grip strength classification and MetS scores were  
15  
16 210 selected as confounding variables for model adjustments in this study. Most selected  
17  
18 211 covariates have been reported to be related to renal events<sup>26 30-33</sup>. Univariate analysis  
19  
20 212 of variables between eGFR decline group and non-rapid eGFR decline group were  
21  
22 213 carried out. Logistic models were used to test the association between MetS  
23  
24 214 recovery/occurrence and eGFR rapid decline after adjusting for multiple confounding  
25  
26 215 factors. Furthermore, alterations in MetS status were accompanied by changes of  
27  
28 216 diagnostic conditions (elevated blood glucose, elevated blood pressure, central obesity  
29  
30 217 and dyslipidemia). As a result, logistic models were used to explore the relationship  
31  
32 218 between the recovery/occurrence of Mets components and the rapid decline of eGFR  
33  
34 219 using different adjustments of confounding factors, respectively.  $P < 0.05$  was  
35  
36 220 considered statistically significant (two-sided test). Statistics were generated in IBM  
37  
38 221 SPSS 20.0 software (IBM Corp, Armonk, NY, USA) and StataMP 16 software  
39  
40 222 (StataCorp, Texas, USA).

## 41 42 223 **Patient and public involvement**

43  
44 224 There were no participants involved in the development. The results of the  
45  
46 225 survey are disseminated to the public through websites.

## 47 48 226 49 50 227 **Results**

### 51 52 228 **Participant characteristics**

53  
54 229 As shown (Fig. 1), 4142 participants were selected, including 2460 (59.4%) in the  
55  
56 230 MetS-free group, 361 (8.7%) in the MetS-developed group, 499 (12.0%) in the MetS  
57  
58 231 recovery-group, and 822 (19.8%) in the MetS-chronic group. Comparison of the basic

232 characteristics between the 4142 enrolled participants and 2974 ones that excluded  
233 during follow-up were shown in Supplemental Table 1.

234 Participant characteristics were grouped by the eGFR decline rate (Table 1). A  
235 rapid decline in eGFR developed in 711 (17.2%) participants during the 4-year  
236 follow-up. The median age was 58 (52~64) years and males accounted for 42.5% at  
237 baseline. In contrast to rapid eGFR decline group, the non-rapid eGFR decline group  
238 was significantly higher with respect to FBG, Scr, hemoglobin, eGFR, weight, BMI,  
239 WC, MetS scores, central obesity, and elevated BG (all  $P < 0.05$ ). Those in non-rapid  
240 eGFR decline group were more likely to be female and younger when compared with  
241 the eGFR decline group (both  $P < 0.05$ ).

242

#### 243 **Rapid eGFR decline odds based on Mets recovery or occurrence**

244 Univariate analysis was conducted to select covariates for correction  
245 (Supplemental Table 2). As shown (Table 2), after adjustment for age, sex, BMI, Scr,  
246 hemoglobin, eGFR classification, grip strength classification, and MetS scores, the  
247 odds ratio (OR) of rapid eGFR decline in the MetS-recovery group was 0.64 (OR:  
248 0.64; 95% CI: 0.45–0.90,  $P = 0.01$ ) when compared with the MetS-chronic group. In  
249 contrast, after adjustment for age, sex, BMI, serum creatinine, hemoglobin, eGFR  
250 classification, grip strength classification, and MetS score, the OR of rapid eGFR  
251 decline in the MetS-developed group was 1.00 (OR: 1.00; 95% CI: 0.73–1.38,  $P =$   
252 0.98) when compared with the MetS-free group.

#### 253 **MetS components and rapid eGFR decline odds**

254 The association of changes in the composition of MetS groups with rapid eGFR  
255 decline is shown (Table 3). In the baseline MetS population, after adjustment for age,  
256 sex, BMI, serum creatinine, hemoglobin, eGFR classification, grip strength  
257 classification, and MetS score, the OR of rapid eGFR decline in the population  
258 recovered from central obesity was 0.31 (OR: 0.31; 95% CI: 0.15–0.65,  $P < 0.01$ )  
259 when compared with chronic central obesity, whereas recovery from elevated BP,

1  
2  
3  
4 260 dyslipidemia, and elevated BG did not show statistically significant differences when  
5  
6 261 compared with the corresponding population (all  $P > 0.05$ ). In the baseline population  
7  
8 262 without MetS, we observed no statistical difference in the rapid decline of eGFR  
9  
10 263 between the occurrence of all MetS component groups and corresponding contrast  
11  
12 264 groups (all  $P > 0.05$ ). This was consistent with the overall trend.

## 13 14 265 **Discussion**

15  
16 266 We examined the relationship between MetS changes and rapid eGFR decline in  
17  
18 267 a large nationwide cohort. At the 4-year follow-up, MetS recovery was significantly  
19  
20 268 associated with a reduced risk of rapid eGFR decline in the middle-aged and elderly,  
21  
22 269 with only WC recovery consistent with the overall trend. The occurrence of MetS and  
23  
24 270 its components did not significantly increase the risk of rapid eGFR decline. Further  
25  
26 271 follow-up is required to elucidate the relationship between MetS dynamics and the  
27  
28 272 rapid decline in eGFR.

29  
30 273 Longitudinal cohort studies in several Asian countries concluded that MetS  
31  
32 274 increased the risk of CKD, although follow-up times varied from study to study<sup>15-18</sup>  
33  
34 275<sup>34</sup>. However, the effect of MetS on the rapid decline of eGFR remains controversial.  
35  
36 276 In a 3-year cohort, Cheng *et al.* found no significant correlations between MetS and  
37  
38 277 eGFR rapid decline in the elderly<sup>34</sup>. However, other studies reported that baseline  
39  
40 278 MetS was associated with a decline in eGFR and even acted as an independent  
41  
42 279 predictor of eGFR decline<sup>16-18</sup>. Wu *et al.* investigated the association between the  
43  
44 280 MetS severity score and kidney function, and found that the MetS severity score was  
45  
46 281 an independent risk factor for the CKD development and progressive eGFR decline,  
47  
48 282 although the definition of rapid eGFR decline was different from this study<sup>26</sup>. Here,  
49  
50 283 the MetS severity score was a continuous variable that was primarily used to calibrate  
51  
52 284 the MetS (yes vs. no). We noted that none of the aforementioned studies accounted  
53  
54 285 for the MetS status of participants during follow-up periods. In a 4-year follow-up  
55  
56 286 cohort, Park *et al.* explored the relationship between MetS status change and CKD  
57  
58 287 events and concluded that MetS recovery was associated with a decreased risk of  
59  
60

1  
2  
3  
4 288 CKD incidence, but the occurrence of MetS increased the risk of CKD incidence <sup>35</sup>.  
5  
6 289 One of the highlights of the article was to observe the status of MetS three times over  
7  
8 290 a 4-year period, thereby making the MetS diagnosis more robust. However, Park *et al.*  
9  
10 291 did not discuss the association with the rapid eGFR decline. In this study, we  
11  
12 292 concluded that MetS recovery was associated with a reduced risk of rapid eGFR  
13  
14 293 decline, while MetS occurrence was not related to rapid eGFR decline. It should be  
15  
16 294 emphasized that we need to be cautious about the conclusion between the MetS  
17  
18 295 occurrence and the rapid eGFR decline in this study. Because the follow-up time was  
19  
20 296 short and the timing of MetS onset was unknown, the impairment of renal function  
21  
22 297 caused by MetS may not have occurred in some populations. To sum up, studies  
23  
24 298 exploring the relationship between MetS dynamic changes and the rapid decline of  
25  
26 299 eGFR in the Chinese population are rare. Our investigation of the relationship  
27  
28 300 between MetS recovery/occurrence and eGFR rapid decline in a large nationwide  
29  
30 301 cohort may support renal function management in individuals with MetS.

31  
32 302 The effect of MetS on renal function is complex, thus, no definitive mechanisms  
33  
34 303 can explain our study observations. The evidence suggests that every component of  
35  
36 304 MetS is associated with adverse renal events (10-14). It is accepted that hypertension  
37  
38 305 and diabetes play pivotal roles in CKD development and progression <sup>36-38</sup>. Also, lipid  
39  
40 306 metabolism dysregulation and abnormal lipid distribution can lead to  
41  
42 307 lipotoxicity-related renal damage <sup>39 40</sup>. Thus, MetS may result from the combined  
43  
44 308 effects of central obesity, increased BP, insulin resistance, and blood lipid disorder,  
45  
46 309 leading to physiopathological lipotoxicity, oxidative stress increments, endothelial  
47  
48 310 dysfunction, elevated inflammation, and apoptosis, which would contribute to kidney  
49  
50 311 dysfunction <sup>5 39</sup>. However, the relationship between MetS components and the weight  
51  
52 312 of each factor on kidney injury remain unclear.

53  
54 313 Our study had some limitations. Firstly, MetS diagnoses were not  
55  
56 314 comprehensively checked (using multiple tests), and the exact timing of the MetS  
57  
58 315 alteration is unknown. Secondly, renal stone disease, epiculopathy, epiculoepicardial  
59  
60

1  
2  
3  
4 316 disease or acute urinary tract infection are related to the occurrence and development  
5  
6 317 of renal disease. Unfortunately, urine or kidney ultrasound results were unavailable in  
7  
8 318 CHARLS cohort. Thirdly, CKD occurrence was not included as a study outcome  
9  
10 319 because of the lack of urine test results, which would underestimate the CKD  
11  
12 320 incidence. Fourthly, blood analyses from Wave 1 and Wave 3 were performed at a  
13  
14 321 different testing center, with inconsistent HDL, TG, and BG measurement methods,  
15  
16 322 therefore, measurement errors may have occurred. Fifthly, a large proportion of  
17  
18 323 individuals were excluded due to exclusion criteria or missing values, and the basic  
19  
20 324 characteristics between the 4142 enrolled participants and 2974 ones that excluded  
21  
22 325 during follow-up might have biased some of our results. Sixthly, we did not establish  
23  
24 326 a model with all 4 MetS change groups included in the study.

## 26 327 **Conclusions**

28 328 Over a 4-year follow-up, we observed that MetS recovery, including recovery of  
29  
30 329 central obesity, was associated with a reduced risk of rapid eGFR decline in  
31  
32 330 middle-aged and older adults, while MetS occurrence was not related to rapid eGFR  
33  
34 331 decline. Reversing MetS, especially central obesity, might benefit the kidney function  
35  
36 332 in MetS population. But, further follow-up studies are required to observe the  
37  
38 333 relationship between MetS alterations and adverse renal events.

40 334 **Contributors** PL and LT contributed equally to this paper. PL, LT and JF—analysis  
41  
42 335 and interpretation of data and preparation of the manuscript. XL—study concept and  
43  
44 336 design, and preparation and critical review of the manuscript. CC—critical review and  
45  
46 337 statistical guidance of the revised manuscript. All authors have approved the final  
47  
48 338 manuscript.

50 339 **Competing interests** All authors declared no competing interests.

51  
52 340 **Funding** This work was supported by Guangzhou Municipal Science and Technology  
53  
54 341 Bureau (202002020047) and Legal and Ethical Compliance Standards for Data Use in  
55  
56 342 Clinical Research on Major Chronic Diseases Based on Data Security  
57  
58 343 (2018YFC1315403).



1  
2  
3  
4 344 **Data availability statement** CHARLS data of the study will be available to  
5  
6 345 investigators at the CHARLS website (<http://charls.pku.edu.cn/en>).

7  
8 346 **Ethics statement** The Medical Ethics Review Committee of Peking University  
9  
10 347 approved this study and all participants provided written informed consent before  
11  
12 348 participating. This study is a secondary analysis of a public dataset and does not  
13  
14 349 require ethics approval again.

15  
16 350 **Acknowledgements** The authors are grateful to the China Health and Retirement  
17  
18 351 Longitudinal Study (CHARLS) team for providing the data.

## 21 352 **References**

- 23 353 1. Alberti KG, Zimmet P, Shaw J. The metabolic syndrome--a new worldwide definition. *Lancet*  
24 354 (*London, England*) 2005;366(9491):1059-62. doi: 10.1016/s0140-6736(05)67402-8 [published  
25 355 Online First: 2005/09/27]
- 27 356 2. 2018 Chinese Guidelines for Prevention and Treatment of Hypertension-A report of the Revision  
28 357 Committee of Chinese Guidelines for Prevention and Treatment of Hypertension. *Journal of*  
29 358 *geriatric cardiology : JGC* 2019;16(3):182-241. doi: 10.11909/j.issn.1671-5411.2019.03.014  
30 359 [published Online First: 2019/05/14]
- 32 360 3. Huang PL. A comprehensive definition for metabolic syndrome. *Disease models & mechanisms*  
33 361 2009;2(5-6):231-7. doi: 10.1242/dmm.001180 [published Online First: 2009/05/02]
- 35 362 4. Saklayen MG. The Global Epidemic of the Metabolic Syndrome. *Current hypertension reports*  
36 363 2018;20(2):12. doi: 10.1007/s11906-018-0812-z [published Online First: 2018/02/27]
- 38 364 5. McCracken E, Monaghan M, Sreenivasan S. Pathophysiology of the metabolic syndrome. *Clinics in*  
39 365 *dermatology* 2018;36(1):14-20. doi: 10.1016/j.clindermatol.2017.09.004 [published Online  
40 366 First: 2017/12/16]
- 42 367 6. Zhang X, Lerman LO. The metabolic syndrome and chronic kidney disease. *Translational research : the*  
43 368 *journal of laboratory and clinical medicine* 2017;183:14-25. doi:  
44 369 10.1016/j.trsl.2016.12.004 [published Online First: 2016/12/28]
- 46 370 7. Lee EY, Han K, Kim DH, et al. Exposure-weighted scoring for metabolic syndrome and the risk of  
47 371 myocardial infarction and stroke: a nationwide population-based study. *Cardiovascular*  
48 372 *diabetology* 2020;19(1):153. doi: 10.1186/s12933-020-01129-x [published Online First:  
49 373 2020/10/01]
- 51 374 8. Guembe MJ, Fernandez-Lazaro CI, Sayon-Orea C, et al. Risk for cardiovascular disease associated  
52 375 with metabolic syndrome and its components: a 13-year prospective study in the RIVANA  
53 376 cohort. *Cardiovascular diabetology* 2020;19(1):195. doi: 10.1186/s12933-020-01166-6  
54 377 [published Online First: 2020/11/24]
- 56 378 9. Hoang K, Zhao Y, Gardin JM, et al. LV Mass as a Predictor of CVD Events in Older Adults With and  
57 379 Without Metabolic Syndrome and Diabetes. *JACC Cardiovascular imaging* 2015;8(9):1007-15.  
58 380 doi: 10.1016/j.jcmg.2015.04.019 [published Online First: 2015/09/01]

- 1  
2  
3 381 10. Xie K, Bao L, Jiang X, et al. The association of metabolic syndrome components and chronic kidney  
4 382 disease in patients with hypertension. *Lipids Health Dis* 2019;18(1):229. doi:  
5 383 10.1186/s12944-019-1121-5 [published Online First: 2019/12/29]  
6  
7 384 11. Viazzi F, Piscitelli P, Giorda C, et al. Metabolic syndrome, serum uric acid and renal risk in patients  
8 385 with T2D. *PloS one* 2017;12(4):e0176058. doi: 10.1371/journal.pone.0176058 [published  
9 386 Online First: 2017/04/20]  
10  
11 387 12. Chen J, Kong X, Jia X, et al. Association between metabolic syndrome and chronic kidney disease in  
12 388 a Chinese urban population. *Clin Chim Acta* 2017;470:103-08. doi: 10.1016/j.cca.2017.05.012  
13 389 [published Online First: 2017/05/16]  
14  
15 390 13. Thomas G, Sehgal AR, Kashyap SR, et al. Metabolic syndrome and kidney disease: a systematic  
16 391 review and meta-analysis. *Clinical journal of the American Society of Nephrology : CJASN*  
17 392 2011;6(10):2364-73. doi: 10.2215/cjn.02180311 [published Online First: 2011/08/20]  
18  
19 393 14. Chang IH, Han JH, Myung SC, et al. Association between metabolic syndrome and chronic kidney  
20 394 disease in the Korean population. *Nephrology (Carlton, Vic)* 2009;14(3):321-6. doi:  
21 395 10.1111/j.1440-1797.2009.01091.x [published Online First: 2009/05/16]  
22  
23 396 15. Hu Y, Shi LX, Zhang Q, et al. Increased Risk of Chronic Kidney Diseases in Patients with Metabolic  
24 397 Syndrome: A 3-year Prospective Cohort Study. *Current medical science* 2019;39(2):204-10.  
25 398 doi: 10.1007/s11596-019-2020-8 [published Online First: 2019/04/25]  
26  
27 399 16. Huh JH, Yadav D, Kim JS, et al. An association of metabolic syndrome and chronic kidney disease  
28 400 from a 10-year prospective cohort study. *Metabolism: clinical and experimental*  
29 401 2017;67:54-61. doi: 10.1016/j.metabol.2016.11.003 [published Online First: 2017/01/14]  
30  
31 402 17. Hayashi K, Takayama M, Abe T, et al. Investigation of Metabolic Factors Associated with eGFR  
32 403 Decline Over 1 Year in a Japanese Population without CKD. *Journal of atherosclerosis and*  
33 404 *thrombosis* 2017;24(8):863-75. doi: 10.5551/jat.38612 [published Online First: 2017/01/27]  
34  
35 405 18. Kawamoto R, Akase T, Ninomiya D, et al. Metabolic syndrome is a predictor of decreased renal  
36 406 function among community-dwelling middle-aged and elderly Japanese. *International*  
37 407 *urology and nephrology* 2019;51(12):2285-94. doi: 10.1007/s11255-019-02320-0 [published  
38 408 Online First: 2019/10/24]  
39  
40 409 19. Zhao Y, Hu Y, Smith JP, et al. Cohort profile: the China Health and Retirement Longitudinal Study  
41 410 (CHARLS). *Int J Epidemiol* 2014;43(1):61-8. doi: 10.1093/ije/dys203 [published Online First:  
42 411 2012/12/18]  
43  
44 412 20. Zhao Y, Crimmins E, Hu P, et al. ChinaHealth and Retirement Longitudinal Study: 2011–2012  
45 413 National BaselineUsers' Guide. *Beijing, China: National School of Development, Peking*  
46 414 *University* 2013  
47  
48 415 21. Chen X, Crimmins E, Hu PP, et al. Venous Blood-Based Biomarkers in the China Health and  
49 416 Retirement Longitudinal Study: Rationale, Design, and Results From the 2015 Wave.  
50 417 *American journal of epidemiology* 2019;188(11):1871-77. doi: 10.1093/aje/kwz170  
51 418 [published Online First: 2019/08/01]  
52  
53 419 22. Alberti KG, Eckel RH, Grundy SM, et al. Harmonizing the metabolic syndrome: a joint interim  
54 420 statement of the International Diabetes Federation Task Force on Epidemiology and  
55 421 Prevention; National Heart, Lung, and Blood Institute; American Heart Association; World  
56 422 Heart Federation; International Atherosclerosis Society; and International Association for the

- 1  
2  
3 423 Study of Obesity. *Circulation* 2009;120(16):1640-5. doi: 10.1161/circulationaha.109.192644  
4 424 [published Online First: 2009/10/07]  
5  
6 425 23. Classification and Diagnosis of Diabetes: Standards of Medical Care in Diabetes-2021. *Diabetes*  
7 426 *Care* 2021;44(Suppl 1):S15-s33. doi: 10.2337/dc21-S002 [published Online First: 2020/12/11]  
8  
9 427 24. Inker LA, Schmid CH, Tighiouart H, et al. Estimating glomerular filtration rate from serum  
10 428 creatinine and cystatin C. *The New England journal of medicine* 2012;367(1):20-9. doi:  
11 429 10.1056/NEJMoa1114248  
12  
13 430 25. Lindeman RD, Tobin J, Shock NW. Longitudinal studies on the rate of decline in renal function with  
14 431 age. *Journal of the American Geriatrics Society* 1985;33(4):278-85. doi:  
15 432 10.1111/j.1532-5415.1985.tb07117.x [published Online First: 1985/04/01]  
16  
17 433 26. Wu M, Shu Y, Wang L, et al. Metabolic syndrome severity score and the progression of CKD.  
18 434 *European journal of clinical investigation* 2021:e13646. doi: 10.1111/eci.13646 [published  
19 435 Online First: 2021/07/02]  
20  
21 436 27. Wijndaele K, Beunen G, Duvigneaud N, et al. A continuous metabolic syndrome risk score: utility  
22 437 for epidemiological analyses. *Diabetes Care* 2006;29(10):2329. doi: 10.2337/dc06-1341  
23 438 [published Online First: 2006/09/28]  
24  
25 439 28. Jia F, Li X, Liu F, et al. Association of renal function and depressive symptoms: Evidence from the  
26 440 China health and retirement longitudinal study. *Journal of psychosomatic research*  
27 441 2020;137:110224. doi: 10.1016/j.jpsychores.2020.110224 [published Online First:  
28 442 2020/08/31]  
29  
30 443 29. Irwin M, Artin KH, Oxman MN. Screening for depression in the older adult: criterion validity of the  
31 444 10-item Center for Epidemiological Studies Depression Scale (CES-D). *Archives of internal*  
32 445 *medicine* 1999;159(15):1701-4. doi: 10.1001/archinte.159.15.1701 [published Online First:  
33 446 1999/08/17]  
34  
35 447 30. Ma X, Zhang C, Su H, et al. Increasing Body Mass Index Predicts Rapid Decline in Renal Function: A  
36 448 5 Year Retrospective Study. *Hormone and metabolic research = Hormon- und*  
37 449 *Stoffwechselforschung = Hormones et metabolisme* 2018;50(7):556-61. doi:  
38 450 10.1055/a-0599-6360 [published Online First: 2018/05/03]  
39  
40 451 31. Meguro S, Tomita M, Kabeya Y, et al. Factors Associated with the Decline of Kidney Function Differ  
41 452 among eGFR Strata in Subjects with Type 2 Diabetes Mellitus. *International journal of*  
42 453 *endocrinology* 2012;2012:687867. doi: 10.1155/2012/687867 [published Online First:  
43 454 2013/01/15]  
44  
45 455 32. Deicher R, Hörl WH. Anaemia as a risk factor for the progression of chronic kidney disease. *Current*  
46 456 *opinion in nephrology and hypertension* 2003;12(2):139-43. doi:  
47 457 10.1097/00041552-200303000-00003 [published Online First: 2003/02/18]  
48  
49 458 33. Young BA, Katz R, Boulware LE, et al. Risk Factors for Rapid Kidney Function Decline Among African  
50 459 Americans: The Jackson Heart Study (JHS). *Am J Kidney Dis* 2016;68(2):229-39. doi:  
51 460 10.1053/j.ajkd.2016.02.046 [published Online First: 2016/04/14]  
52  
53 461 34. Cheng HT, Huang JW, Chiang CK, et al. Metabolic syndrome and insulin resistance as risk factors  
54 462 for development of chronic kidney disease and rapid decline in renal function in elderly. *The*  
55 463 *Journal of clinical endocrinology and metabolism* 2012;97(4):1268-76. doi:  
56 464 10.1210/jc.2011-2658 [published Online First: 2012/02/18]  
57  
58  
59  
60

- 1  
2  
3 465 35. Park S, Lee S, Kim Y, et al. Reduced risk for chronic kidney disease after recovery from metabolic  
4 466 syndrome: A nationwide population-based study. *Kidney research and clinical practice*  
5 467 2020;39(2):180-91. doi: 10.23876/j.krcp.20.016 [published Online First: 2020/04/30]  
6  
7 468 36. Webster AC, Nagler EV, Morton RL, et al. Chronic Kidney Disease. *Lancet (London, England)*  
8 469 2017;389(10075):1238-52. doi: 10.1016/s0140-6736(16)32064-5 [published Online First:  
9 470 2016/11/27]  
10  
11 471 37. Tonneijck L, Muskiet MH, Smits MM, et al. Glomerular Hyperfiltration in Diabetes: Mechanisms,  
12 472 Clinical Significance, and Treatment. *J Am Soc Nephrol* 2017;28(4):1023-39. doi:  
13 473 10.1681/asn.2016060666 [published Online First: 2017/02/02]  
14  
15 474 38. Ruiz-Ortega M, Rayego-Mateos S, Lamas S, et al. Targeting the progression of chronic kidney  
16 475 disease. *Nature reviews Nephrology* 2020;16(5):269-88. doi: 10.1038/s41581-019-0248-y  
17 476 [published Online First: 2020/02/16]  
18  
19 477 39. Kim Y, Park CW. Can management of the components of metabolic syndrome modify the course  
20 478 of chronic kidney disease? *Kidney research and clinical practice* 2020;39(2):118-20. doi:  
21 479 10.23876/j.krcp.20.066 [published Online First: 2020/06/12]  
22  
23 480 40. D'Agati VD, Chagnac A, de Zeeuw D, et al. Obesity-related glomerulopathy: clinical and pathologic  
24 481 characteristics and pathogenesis. *Nature reviews Nephrology* 2016;12(8):453-71. doi:  
25 482 10.1038/nrneph.2016.75 [published Online First: 2016/06/07]  
26  
27  
28 483

29 **Table 1. Baseline characteristics of participants between rapid eGFR decline group and non-rapid eGFR decline group**

| Characteristics                    | Overall<br>(n = 4142) | Rapid eGFR decline<br>(n = 711) | Non-rapid eGFR decline<br>(n = 3431) | P value |
|------------------------------------|-----------------------|---------------------------------|--------------------------------------|---------|
| Male [n (%)]                       | 1874 (45.2)           | 351 (49.4)                      | 1523 (44.4)                          | 0.02    |
| Age (years)                        | 58 (52~64)            | 59 (52~66)                      | 58 (52~64)                           | 0.02    |
| Married with spouse [n (%)]        | 3548 (87.5)           | 610 (85.8)                      | 2938 (85.6)                          | 0.91    |
| Education                          |                       |                                 |                                      |         |
| Illiterate [n (%)]                 | 1206 (29.1)           | 191 (26.9)                      | 1015 (29.6)                          |         |
| Middle school and below [n (%)]    | 1770 (41.2)           | 309 (43.5)                      | 1398 (40.7)                          | 0.28    |
| High school and above [n (%)]      | 1229 (29.7)           | 211 (29.7)                      | 1018 (29.7)                          |         |
| Household per capita income (yuan) | 6461.0                | 6000.0                          | 6560.0                               | 0.20    |
| <i>M</i> (P25~P75)                 | (2336.7~13487.5)      | (1866.7~13490.0)                | (2450.0~13486.7)                     |         |
| Drink [n (%)]                      | 1470 (32.2)           | 234 (32.9)                      | 1173 (34.2)                          | 0.51    |
| Smoke [n (%)]                      | 1567 (37.8)           | 272 (38.3)                      | 1295 (37.7)                          | 0.80    |
| Blood urea nitrogen (mg/dl)        | 15.0 (12.5~17.8)      | 15.1 (12.6~18.2)                | 15.0 (12.5~17.7)                     | 0.18    |
| Fasting glucose (mg/dl)            | 102.4 (94.9~111.2)    | 100.6 (93.4~109.8)              | 102.4 (95.2~111.4)                   | 0.001   |
| Creatinine (mg/dl)                 | 0.75 (0.64~0.84)      | 0.71 (0.60~0.84)                | 0.76 (0.64~0.86)                     | <0.001  |
| Total cholesterol (mg/dl)          | 190.6 (168.6~215.8)   | 189.8 (164.7~215.3)             | 190.6 (169.3~216.1)                  | 0.20    |
| Triglyceride (mg/dl)               | 105.3 (74.3~148.7)    | 101.8 (71.7~146)                | 106.2 (74.3~148.7)                   | 0.23    |
| HDL cholesterol (mg/dl)            | 49.1 (41.0~59.5)      | 49.5 (41.0~59.9)                | 49.1 (41.0~59.5)                     | 0.81    |
| hs-CRP (mg/l)                      | 1.0 (0.5~2.0)         | 1.0 (0.6~2)                     | 1.0 (0.5~2.0)                        | 0.43    |
| GHbA1c (%)                         | 5.1 (4.9~5.4)         | 5.1 (4.9~5.4)                   | 5.1 (4.9~5.4)                        | 0.36    |
| Uric acid (mg/dl)                  | 4.2 (3.5~5.0)         | 4.2 (3.5~5.0)                   | 4.2 (3.5~5.0)                        | 0.83    |

|    |                                                     |                     |                     |                     |        |
|----|-----------------------------------------------------|---------------------|---------------------|---------------------|--------|
| 1  |                                                     |                     |                     |                     |        |
| 2  |                                                     |                     |                     |                     |        |
| 3  | Hemoglobin (mg/dl)                                  | 14.2 (13.1~15.5)    | 14.0 (12.8~15.1)    | 14.3 (13.1~15.5)    | <0.001 |
| 4  | eGFR (ml/min/1.73m <sup>2</sup> )                   | 95.9 (86.4~102.9)   | 97.0 (88.3~106.1)   | 95.6 (85.9~102.4)   | <0.001 |
| 5  | eGFR group                                          |                     |                     |                     |        |
| 6  |                                                     |                     |                     |                     |        |
| 7  | 60~89 ml/min/1.73m <sup>2</sup> [ <i>n</i> (%)]     | 1368 (33.0)         | 209 (29.4)          | 1158 (33.8)         | 0.02   |
| 8  | 90~ ml/min/1.73m <sup>2</sup> [ <i>n</i> (%)]       | 2774 (67.0)         | 502 (70.6)          | 2272 (66.2)         |        |
| 9  | Grip strength (kg)                                  | 29.3 (23.8~36.5)    | 29.5 (24.9~36.2)    | 29.3 (23.5~36.7)    | 0.13   |
| 10 | Grip strength group                                 |                     |                     |                     |        |
| 11 |                                                     |                     |                     |                     |        |
| 12 | T1 [ <i>n</i> (%)]                                  | 1386 (33.5)         | 209 (29.4)          | 1177 (34.3)         | 0.01   |
| 13 | T2 [ <i>n</i> (%)]                                  | 1387 (33.5)         | 268 (37.7)          | 1199 (32.6)         |        |
| 14 | T3 [ <i>n</i> (%)]                                  | 1369 (33.1)         | 234 (32.9)          | 1135 (33.1)         |        |
| 15 | Height (cm)                                         | 157.7 (152.0~163.8) | 157.9 (152.0~163.7) | 157.6 (152.0~163.9) | 0.64   |
| 16 | Weight (kg)                                         | 58 (51.3~65.5)      | 57.1 (50.8~65.1)    | 58.2 (51.4~65.7)    | 0.08   |
| 17 | Body mass index (kg/m <sup>2</sup> )                | 23.2 (21~25.7)      | 22.9 (20.8~25.4)    | 23.3 (21.1~25.8)    | 0.01   |
| 18 | Waist circumference (cm)                            | 84.4 (78.0~92.0)    | 83.6 (77.0~90.2)    | 84.8 (78.1~92.0)    | <0.01  |
| 19 | Systolic blood pressure (mmHg)                      | 127 (114~141)       | 128 (114~142)       | 127 (114~141)       | 0.72   |
| 20 | Diastolic blood pressure (mmHg)                     | 75 (67~83)          | 74 (66~83)          | 75 (67~83)          | 0.41   |
| 21 | Mean arterial pressure (mmHg)                       | 92 (83~102)         | 92 (83~103)         | 92 (84~102)         | 0.76   |
| 22 | Depression symptom [ <i>n</i> (%)]                  | 1904 (46.0)         | 319 (44.9)          | 1585 (46.2)         | 0.52   |
| 23 | Self-report hypertension [ <i>n</i> (%)]            | 887 (21.4)          | 157 (22.1)          | 730 (21.3)          | 0.63   |
| 24 | Self-report dyslipidemia [ <i>n</i> (%)]            | 333 (8.0)           | 58 (8.2)            | 275 (8.0)           | 0.90   |
| 25 | Self-report diabetes or HBG [ <i>n</i> (%)]         | 191 (4.6)           | 28 (3.9)            | 163 (4.8)           | 0.35   |
| 26 | Self-report arthritis or rheumatism [ <i>n</i> (%)] | 1345 (32.5)         | 235 (33.1)          | 1110 (32.4)         | 0.71   |
| 27 | Antihypertensive therapy [ <i>n</i> (%)]            | 664 (16.0)          | 119 (16.7)          | 545 (19.5)          | 0.57   |
| 28 | Lipid-lowering therapy [ <i>n</i> (%)]              | 187 (4.5)           | 37 (5.2)            | 150 (4.4)           | 0.33   |
| 29 | Hypoglycemic therapy [ <i>n</i> (%)]                | 127 (3.1)           | 19 (2.7)            | 108 (3.1)           | 0.50   |
| 30 | Therapy for arthritis or rheumatism [ <i>n</i> (%)] | 643 (15.5)          | 116 (16.3)          | 527 (15.4)          | 0.52   |
| 31 | Metabolic syndrome [ <i>n</i> (%)]                  | 1321 (31.9)         | 207 (29.1)          | 1114 (32.5)         | 0.08   |
| 32 | MetS scores                                         | -0.1 (-0.4~0.3)     | -0.1 (-0.5~0.3)     | 0 (-0.4~0.3)        | 0.02   |
| 33 | Metabolic syndrome components                       |                     |                     |                     |        |
| 34 | Central obesity [ <i>n</i> (%)]                     | 1726 (41.7)         | 264 (37.1)          | 1462 (42.6)         | <0.01  |
| 35 | Elevated blood pressure [ <i>n</i> (%)]             | 2099 (50.7)         | 368 (51.8)          | 1731 (50.5)         | 0.52   |
| 36 | Dyslipidemia [ <i>n</i> (%)]                        | 1595 (38.5)         | 278 (39.1)          | 1317 (38.4)         | 0.72   |
| 37 | Elevated blood glucose [ <i>n</i> (%)]              | 2456 (59.3)         | 383 (53.9)          | 2073 (60.4)         | <0.01  |
| 38 | Baseline non-MetS group                             |                     |                     |                     |        |
| 39 | MetS-free [ <i>n</i> (%)]                           | 2460 (59.4)         | 444 (62.4)          | 2016 (58.8)         |        |
| 40 | MetS-developed [ <i>n</i> (%)]                      | 361 (8.7)           | 60 (8.4)            | 301 (8.8)           |        |
| 41 | Baseline Mets group                                 |                     |                     |                     |        |
| 42 | MetS-recovery [ <i>n</i> (%)]                       | 499 (12.0)          | 64 (9.0)            | 435 (12.7)          |        |
| 43 | MetS-chronic [ <i>n</i> (%)]                        | 822 (19.8)          | 143 (20.1)          | 679 (19.8)          |        |

Data are *n* (%) or median (interquartile range); HDL: high density lipoprotein; hs-CRP: high-sensitivity C-reactive protein; eGFR: estimated glomerular filtration rate; MetS: metabolic syndrome.

grip strength is divided into T1, T2 and T3 groups by one-third percentile.

484

**Table 2. Multivariate logistic regression of rapid eGFR decline between study groups**

|                          | Model 1                 |                | Model 2                 |                |
|--------------------------|-------------------------|----------------|-------------------------|----------------|
|                          | Adjusted OR<br>(95% CI) | <i>P</i> value | Adjusted OR<br>(95% CI) | <i>P</i> value |
| Baseline MetS groups     |                         |                |                         |                |
| MetS-chronic             | ref                     |                | ref                     |                |
| MetS-recovery            | 0.68 (0.50-0.95)        | 0.02           | 0.64 (0.45-0.90)        | 0.01           |
| Baseline non-MetS groups |                         |                |                         |                |
| MetS-free                | ref                     |                | ref                     |                |
| MetS-developed           | 0.93 (0.69-1.25)        | 0.64           | 1.00 (0.73-1.38)        | 0.98           |

Model 1: additional adjusted for age and sex.

Model 2: additional adjusted for age, sex, serum creatinine, eGFR classification, grip strength classification; hemoglobin; MetS scores and body mass index.

eGFR: estimated glomerular filtration rate; CI: confidence interval; OR: odds ratio; MetS: metabolic syndrome.

485

**Table 3. Multivariate logistic regression of rapid eGFR decline between study groups according the changes of MetS components**

|                                                                                      | Model 1                 |                | Model 2                 |                |
|--------------------------------------------------------------------------------------|-------------------------|----------------|-------------------------|----------------|
|                                                                                      | Adjusted OR<br>(95% CI) | <i>P</i> value | Adjusted OR<br>(95% CI) | <i>P</i> value |
| Recovered components in baseline MetS groups (chronic MetS components as reference)  |                         |                |                         |                |
| Central obesity                                                                      | 0.29 (0.15-0.59)        | 0.01           | 0.31 (0.15-0.65)        | <0.01          |
| Elevated blood pressure                                                              | 0.80 (0.50-1.26)        | 0.33           | 0.79 (0.49-1.27)        | 0.33           |
| Elevated SBP                                                                         | 0.89 (0.61-1.31)        | 0.56           | 0.88 (0.59-1.30)        | 0.51           |
| Elevated DBP                                                                         | 0.75 (0.46-1.23)        | 0.26           | 0.68 (0.41-1.15)        | 0.15           |
| Dyslipidemia                                                                         | 1.09 (0.82-1.44)        | 0.57           | 1.05 (0.78-1.40)        | 0.77           |
| Elevated TG                                                                          | 1.22 (0.87-1.72)        | 0.26           | 1.14 (0.79-1.36)        | 0.50           |
| Decreased HDL                                                                        | 0.84 (0.59-1.12)        | 0.32           | 0.85 (0.59-1.22)        | 0.38           |
| Elevated blood glucose                                                               | 1.08 (0.87-1.34)        | 0.49           | 1.08 (0.86-1.36)        | 0.52           |
| Elevated fasting glucose                                                             | 1.14 (0.91-1.43)        | 0.25           | 1.13 (0.89-1.43)        | 0.32           |
| Developed components in baseline non-MetS groups (free MetS components as reference) |                         |                |                         |                |
| Central obesity                                                                      | 1.21 (0.92-1.59)        | 0.16           | 1.32 (0.97-1.77)        | 0.74           |
| Elevated blood pressure                                                              | 0.84 (0.63-1.13)        | 0.26           | 0.87 (0.64-1.18)        | 0.37           |
| Elevated SBP                                                                         | 0.88 (0.66-1.17)        | 0.37           | 0.92 (0.68-1.23)        | 0.56           |
| Elevated DBP                                                                         | 0.88 (0.62-1.24)        | 0.46           | 0.91 (0.63-1.30)        | 0.59           |
| Dyslipidemia                                                                         | 0.92 (0.69-1.22)        | 0.54           | 0.96 (0.72-1.30)        | 0.81           |
| Elevated TG                                                                          | 0.93 (0.70-1.25)        | 0.64           | 1.02 (0.75-1.37)        | 0.91           |
| Decreased HDL                                                                        | 1.02 (0.65-1.59)        | 0.95           | 0.97 (0.61-1.55)        | 0.91           |
| Elevated blood glucose                                                               | 1.07 (0.76-1.50)        | 0.71           | 1.07 (0.75-1.52)        | 0.71           |
| Elevated fasting glucose                                                             | 1.06 (0.74-1.51)        | 0.76           | 1.09 (0.76-1.57)        | 0.64           |

eGFR: estimated glomerular filtration rate; CI: confidence interval; OR: odds ratio; MetS: metabolic syndrome;

1  
2  
3  
4  
5  
6  
7  
8  
9  
10  
11  
12  
13  
14  
15  
16  
17  
18  
19  
20  
21  
22  
23  
24  
25  
26  
27  
28  
29  
30  
31  
32  
33  
34  
35  
36  
37  
38  
39  
40  
41  
42  
43  
44  
45  
46  
47  
48  
49  
50  
51  
52  
53  
54  
55  
56  
57  
58  
59  
60

---

SBP: systolic blood pressure; DBP: diastolic blood pressure; TG: triglyceride; HDL: high density lipoprotein.

Model 1: additional adjusted for age and sex.

Model 2: additional adjusted for age, sex, serum creatinine, eGFR classification, grip strength classification, hemoglobin, MetS score and body mass index.

Each Mets components run in their own model to predict rapid eGFR decline

486 Figure 1. Flowchart of participants selection. eGFR: estimated glomerular filtration  
487 rate; MetS: metabolic syndrome

488 Supplementary file

489 Table S1. Baseline characteristics of participants included and excluded in the study

490 Table S2. Univariate analysis of variables between eGFR decline group and non-rapid  
491 eGFR decline group

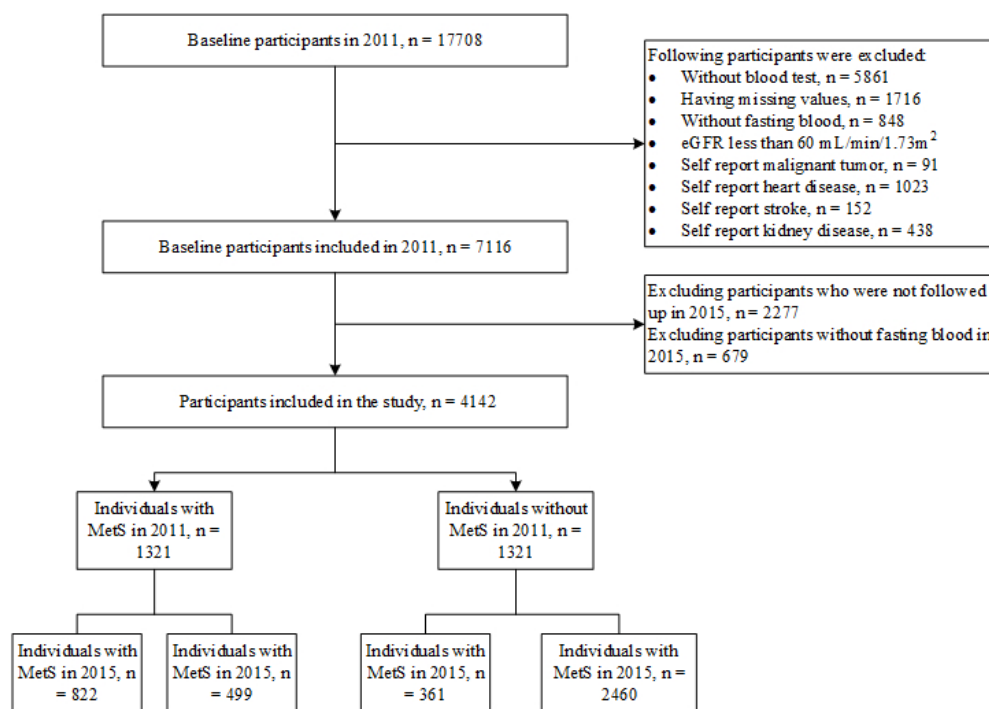

Flowchart of participants selection. eGFR: estimated glomerular filtration rate; MetS: metabolic syndrome

193x135mm (96 x 96 DPI)



1  
2  
3  
4 **Association between recovery/occurrence of metabolic syndrome and rapid estimated**  
5 **glomerular filtration rate decline in middle-aged and older populations: evidence from**  
6  
7 **the China Health and Retirement Longitudinal Study**

8  
9 **Peijia Liu,<sup>1,2</sup> Leile Tang,<sup>3</sup> Jia fang,<sup>1</sup> Chaojin Chen,<sup>4\*</sup> Xun Liu<sup>1\*</sup>**

10  
11 <sup>1</sup>Department of Nephrology, The Third Affiliated Hospital of Sun Yat-Sen University, Guangzhou,  
12  
13 Guangdong, China;

14  
15 <sup>2</sup>Department of Nephrology, The Eighth People's Hospital of Guangzhou, Guangzhou, Guangdong,  
16  
17 China;

18  
19 <sup>3</sup>Department of Cardiology, The Third Affiliated Hospital of Sun Yat-Sen University, Guangzhou,  
20  
21 Guangdong, China

22  
23 <sup>4</sup>Department of Anesthesiology, Third Affiliated Hospital of Sun Yat-sen University, Guangzhou,  
24  
25 Guangdong, China

26  
27  
28  
29 **\*Correspondence to**

30  
31 Dr Xun Liu;

32  
33 [naturestyle@163.com](mailto:naturestyle@163.com);

34  
35 Department of Nephrology,

36  
37 The Third Affiliated Hospital of Sun Yat-Sen University,

38  
39 Guangzhou, Guangdong, 510630, China

40  
41 &

42  
43 Dr Chaojin Chen;

44  
45 [chenchj28@mail.sysu.edu.cn](mailto:chenchj28@mail.sysu.edu.cn);

46  
47 Department of Anesthesiology,

48  
49 The Third Affiliated Hospital of Sun Yat-Sen University,

50  
51 Guangzhou, Guangdong, 510630, China

**Table S1. Baseline characteristics of participants included and excluded in the study**

| Characteristics                         | participants included   |                     |                     | P-value |
|-----------------------------------------|-------------------------|---------------------|---------------------|---------|
|                                         | in baseline<br>(n=7116) | group 1<br>(n=2974) | group 2<br>(n=4142) |         |
| Age (years)                             | 58 (52~65)              | 58 (52~64)          | 58 (51~66)          | 0.98    |
| Male [ <i>n</i> (%)]                    | 3332 (46.8)             | 1458 (49.0)         | 1874 (45.2)         | 0.002   |
| Married with spouse [ <i>n</i> (%)]     | 5977 (84.0)             | 2974 (81.7)         | 3548 (87.5)         | <0.001  |
| Education                               |                         |                     |                     | 0.07    |
| Illiterate [ <i>n</i> (%)]              | 2106 (29.6)             | 900 (30.3)          | 1206 (29.1)         |         |
| Middle school and below [ <i>n</i> (%)] | 2853 (40.1)             | 1146 (38.5)         | 1770 (41.2)         |         |
| High school and above [ <i>n</i> (%)]   | 2157 (30.3)             | 928 (31.2)          | 1229 (29.7)         |         |
| Household per capita income (yuan)      | 6748 (2417~14298)       | 6461 (2337~13487)   | 7276 (2500~15600)   | 0.02    |
| Drink [ <i>n</i> (%)]                   | 2461 (34.6)             | 1054 (35.4)         | 1470 (32.2)         | 0.20    |
| Smoke [ <i>n</i> (%)]                   | 2775 (39.0)             | 1208 (40.6)         | 1567 (37.8)         | 0.02    |
| Blood urea nitrogen (mg/dl)             | 15.1 (12.52~17.90)      | 15.0 (12.5~17.8)    | 15.1 (12.8~18.0)    | 0.16    |
| Fasting glucose (mg/dl)                 | 102.4 (94.5~111.6)      | 102.4 (94.9~111.2)  | 102.1 (94.1~112.5)  | 0.72    |
| Creatinine (mg/dl)                      | 0.76 (0.64~0.86)        | 0.75 (0.64~0.85)    | 0.76 (0.66~0.88)    | <0.001  |
| Total cholesterol (mg/dl)               | 190.2 (168.2~215.3)     | 190.6 (168.6~215.7) | 189.8 (167.4~214.9) | 0.36    |
| Triglyceride (mg/dl)                    | 104.4 (74.34~147.8)     | 105.3 (74.34~148.7) | 104.4 (73.46~147.8) | 0.77    |
| HDL cholesterol (mg/dl)                 | 49.5 (41.0~59.9)        | 49.1 (41.0~59.5)    | 49.9 (41.4~60.3)    | 0.02    |
| hs-CRP (mg/l)                           | 1.03 (0.54~2.04)        | 1.02 (0.54~1.97)    | 1.04 (0.55~2.17)    | 0.62    |
| GHbA1c (%)                              | 5.1 (4.9~5.4)           | 5.1 (4.9~5.4)       | 5.1 (4.9~5.4)       | 0.65    |
| Uric acid (mg/dl)                       | 4.3 (3.6~5.1)           | 4.2 (3.5~5.0)       | 4.4 (3.6~5.1)       | <0.001  |
| Hemoglobin (mg/dl)                      | 14.2 (13.1~15.5)        | 14.2 (13.1~15.5)    | 14.2 (13.1~15.5)    | 0.75    |
| Height (cm)                             | 157.9 (152.0~164.1)     | 157.7 (152.0~163.8) | 157.9 (152~164.5)   | 0.74    |
| Weight (kg)                             | 57.7 (51.0~65.4)        | 58.0 (51.3~65.5)    | 57.5 (50.3~65.2)    | 0.01    |
| Waist (cm)                              | 84.3 (77.6~91.4)        | 84.4 (78.0~92.0)    | 84.0 (77.0~91.0)    | 0.08    |
| Body mass index (kg/m <sup>2</sup> )    | 23.1 (20.8~25.6)        | 23.2 (21.0~25.7)    | 22.9 (20.6~25.5)    | 0.01    |
| Hand grip strength (kg)                 | 29.3 (23.5~36.5)        | 29.1 (23.0~36.5)    | 29.3 (23.8~36.5)    | 0.59    |
| Systolic blood pressure (mmHg)          | 127.3 (114.7~141.3)     | 127.0 (114.3~141.0) | 127.7 (115.3~142.0) | 0.32    |
| Diastolic blood pressure (mmHg)         | 74.7 (67.3~83.0)        | 74.7 (67.0~82.7)    | 75.0 (67.3~83.0)    | 0.34    |
| Mean arterial pressure (mmHg)           | 92.6 (83.7~102.0)       | 92.2 (83.4~101.7)   | 92.6 (84.0~102.6)   | 0.28    |
| eGFR (ml/min/1.73m <sup>2</sup> )       | 95.2 (85.5~102.7)       | 95.9 (86.4~102.9)   | 94.0 (84.3~102.3)   | <0.001  |
| Depression symptom [ <i>n</i> (%)]      | 3172 (44.6)             | 1268 (42.6)         | 1904 (46.0)         | 0.005   |
| Metabolic syndrome [ <i>n</i> (%)]      | 2228 (31.3)             | 907 (30.5)          | 1321 (31.9)         | 0.21    |
| Metabolic syndrome components           |                         |                     |                     |         |
| Elevated blood pressure [ <i>n</i> (%)] | 3622 (50.9)             | 1523 (51.2)         | 2099 (50.7)         | 0.66    |
| Elevated blood glucose [ <i>n</i> (%)]  | 4179 (58.7)             | 1723 (57.9)         | 2456 (59.3)         | 0.25    |
| Dyslipidemia [ <i>n</i> (%)]            | 2673 (37.6)             | 1078 (36.2)         | 1595 (38.5)         | 0.052   |
| Central obesity [ <i>n</i> (%)]         | 2862 (40.2)             | 1136 (38.2)         | 1726 (41.7)         | 0.003   |

Data are *n* (%) or median (interquartile range); HDL: high density lipoprotein; hs-CRP: high-sensitivity C-reactive protein; eGFR: estimated glomerular filtration rate; MetS: metabolic syndrome. Group 1: participants included in the baseline and excluded after follow-up; Group 2: participants included in the study.

**Table S2. Univariate analysis of variables between eGFR decline group and non-rapid eGFR****decline group**

| <b>Characteristics</b>                          | <b>Coef.</b> | <b>95% Conf.</b> | <b>P-value</b> |
|-------------------------------------------------|--------------|------------------|----------------|
| Sex (female as ref)                             | 0.200        | 0.038~0.362      | 0.02           |
| Age (years)                                     | 0.011        | 0.002~0.021      | 0.02           |
| Married status [ <i>n</i> (%)]                  |              |                  |                |
| Other married status                            | ref          | ref              |                |
| Married with spouse                             | 0.013        | -0.218~0.245     | 0.91           |
| Education                                       |              |                  |                |
| Illiterate                                      | ref          | ref              |                |
| Middle school and below                         | 0.160        | --0.037~0.359    | 0.11           |
| High school and above                           | 0.097        | -0.118~0.311     | 0.34           |
| Household per capita income (per 10000 yuan)    | 0.005        | -0.053~0.062     | 0.88           |
| Drink [ <i>n</i> (%)]                           |              |                  |                |
| Smoke [ <i>n</i> (%)]                           | 0.022        | -0.145~0.188     | 0.80           |
| Blood urea nitrogen (mg/dl)                     | 0.019        | -0.001~0.038     | 0.06           |
| Fasting glucose (mg/dl)                         | -0.002       | -0.005~0.001     | 0.28           |
| Creatinine (mg/dl)                              | -1.818       | -2.368~-1.268    | <0.001         |
| Total cholesterol (mg/dl)                       | -0.001       | -0.004~0.001     | 0.21           |
| Triglyceride (mg/dl)                            | -0.0004      | -                | 0.39           |
| HDL cholesterol (mg/dl)                         | 0.007        | -0.005~0.006     | 0.80           |
| hs-CRP (mg/l)                                   | 0.004        | -0.013~0.020     | 0.66           |
| GHbA1c (%)                                      | -0.051       | -0.167~0.066     | 0.40           |
| Uric acid (mg/dl)                               | 0.003        | -0.066~0.072     | 0.93           |
| Hemoglobin (mg/dl)                              | -0.102       | -0.144~-0.060    | <0.001         |
| eGFR (ml/min/1.73m <sup>2</sup> )               | 0.023        | 0.017~0.030      | <0.001         |
| eGFR group                                      |              |                  |                |
| 60~89 ml/min/1.73m <sup>2</sup> [ <i>n</i> (%)] | ref          | ref              |                |
| 90~ ml/min/1.73m <sup>2</sup> [ <i>n</i> (%)]   | 0.203        | 0.026~0.379      | 0.02           |
| Grip strength (kg)                              | 0.004        | -0.005~0.012     | 0.38           |
| Grip strength group                             |              |                  |                |
| T1 [ <i>n</i> (%)]                              | ref          | ref              |                |
| T2 [ <i>n</i> (%)]                              | 0.311        | 0.112~0.511      | <0.01          |
| T3 [ <i>n</i> (%)]                              | 0.148        | -0.056~0.353     | 0.16           |
| Height (cm)                                     | 0.003        | -0.007~0.013     | 0.58           |
| Weight (kg)                                     | -0.008       | -0.015~0.000     | 0.048          |
| Body mass index (kg/m <sup>2</sup> )            | -0.032       | -0.056~-0.009    | 0.01           |
| Waist circumference (cm)                        | -0.012       | -0.018~-0.005    | <0.001         |
| Systolic blood pressure (mmHg)                  | 0.002        | -0.002~0.006     | 0.33           |

|    |                                                     |        |               |       |
|----|-----------------------------------------------------|--------|---------------|-------|
| 1  |                                                     |        |               |       |
| 2  |                                                     |        |               |       |
| 3  | Diastolic blood pressure (mmHg)                     | -0.001 | -0.008~0.005  | 0.76  |
| 4  | Mean arterial pressure (mmHg)                       | 0.001  | -0.005~0.007  | 0.75  |
| 5  | Depression symptom [ <i>n</i> (%)]                  | -0.054 | -0.216~0.109  | 0.52  |
| 6  | Self-report hypertension [ <i>n</i> (%)]            | 0.047  | -0.148~0.243  | 0.63  |
| 7  | Self-report dyslipidemia [ <i>n</i> (%)]            | 0.019  | -0.276~0.315  | 0.90  |
| 8  | Self-report diabetes or HBG [ <i>n</i> (%)]         | -0.196 | -0.065~0.213  | 0.35  |
| 9  | Self-report arthritis or rheumatism [ <i>n</i> (%)] | -0.032 | -0.204~0.140  | 0.71  |
| 10 | Antihypertensive therapy [ <i>n</i> (%)]            | 0.062  | -0.155~0.280  | 0.57  |
| 11 | Lipid-lowering therapy [ <i>n</i> (%)]              | 0.183  | -0.186~0.552  | 0.33  |
| 12 | Hypoglycemic therapy [ <i>n</i> (%)]                | -0.169 | -0.663~0.326  | 0.50  |
| 13 | Therapy for arthritis or rheumatism [ <i>n</i> (%)] | 0.072  | -0.148~0.291  | 0.52  |
| 14 | Metabolic syndrome [ <i>n</i> (%)]                  | -0.158 | -0.334~0.019  | 0.08  |
| 15 | MetS scores                                         | -0.138 | -0.279~0.003  | 0.055 |
| 16 | Metabolic syndrome components                       |        |               |       |
| 17 | Central obesity [ <i>n</i> (%)]                     | -0.229 | -0.395~-0.062 | 0.01  |
| 18 | Elevated blood pressure [ <i>n</i> (%)]             | 0.052  | -0.109~0.214  | 0.53  |
| 19 | Dyslipidemia [ <i>n</i> (%)]                        | 0.030  | -0.135~0.196  | 0.72  |
| 20 | Elevated blood glucose [ <i>n</i> (%)]              | -0.268 | -0.431~0.105  | 0.001 |

21 Data are *n* (%) or median (interquartile range); HDL: high density lipoprotein; hs-CRP: high-sensitivity C-reactive  
 22 protein; eGFR:

23 estimated glomerular filtration rate; MetS: metabolic syndrome.

24 grip strength is divided into T1, T2 and T3 groups by one-third percentile.

## STROBE Statement—checklist of items that should be included in reports of observational studies

|                              | Item No | Recommendation                                                                                                                                                                                                                                                                                                                              |
|------------------------------|---------|---------------------------------------------------------------------------------------------------------------------------------------------------------------------------------------------------------------------------------------------------------------------------------------------------------------------------------------------|
| <b>Title and abstract</b>    | 1-3     | (a) Indicate the study's design with a commonly used term in the title or the abstract<br>(b) Provide in the abstract an informative and balanced summary of what was done and what was found                                                                                                                                               |
| <b>Introduction</b>          |         |                                                                                                                                                                                                                                                                                                                                             |
| Background/rationale         | 4       | Explain the scientific background and rationale for the investigation being reported                                                                                                                                                                                                                                                        |
| Objectives                   | 4-5     | State specific objectives, including any prespecified hypotheses                                                                                                                                                                                                                                                                            |
| <b>Methods</b>               |         |                                                                                                                                                                                                                                                                                                                                             |
| Study design                 | 4       | Present key elements of study design early in the paper                                                                                                                                                                                                                                                                                     |
| Setting                      | 4-5     | Describe the setting, locations, and relevant dates, including periods of recruitment, exposure, follow-up, and data collection                                                                                                                                                                                                             |
| Participants                 | 5       | (a) <i>Cohort study</i> —Give the eligibility criteria, and the sources and methods of selection of participants.                                                                                                                                                                                                                           |
| Data sources/<br>measurement | 5-6*    | For each variable of interest, give sources of data and details of methods of assessment (measurement). Describe comparability of assessment methods if there is more than one group                                                                                                                                                        |
| Variables                    | 6-8     | Clearly define all outcomes, exposures, predictors, potential confounders, and effect modifiers. Give diagnostic criteria, if applicable                                                                                                                                                                                                    |
| Bias                         | 5       | Describe any efforts to address potential sources of bias                                                                                                                                                                                                                                                                                   |
| Study size                   | 5       | Explain how the study size was arrived at                                                                                                                                                                                                                                                                                                   |
| Quantitative variables       | 8-9     | Explain how quantitative variables were handled in the analyses. If applicable, describe which groupings were chosen and why                                                                                                                                                                                                                |
| Statistical methods          | 8-9     | (a) Describe all statistical methods, including those used to control for confounding<br>(b) Describe any methods used to examine subgroups and interactions<br>(c) Explain how missing data were addressed<br>(d) <i>Cohort study</i> —If applicable, explain how loss to follow-up was addressed<br>(e) Describe any sensitivity analyses |
| <b>Results</b>               |         |                                                                                                                                                                                                                                                                                                                                             |
| Participants                 | 9*      | (a) Report numbers of individuals at each stage of study—eg numbers potentially eligible, examined for eligibility, confirmed eligible, included in the study, completing follow-up, and analysed<br>(b) Give reasons for non-participation at each stage<br>(c) Consider use of a flow diagram                                             |
| Descriptive data             | 10*     | (a) Give characteristics of study participants (eg demographic, clinical, social) and information on exposures and potential confounders<br>(b) Indicate number of participants with missing data for each variable of interest<br>(c) <i>Cohort study</i> —Summarise follow-up time (eg, average and total amount)                         |
| Outcome data                 | 10*     | <i>Cohort study</i> —Report numbers of outcome events or summary measures over time<br><i>Case-control study</i> —Report numbers in each exposure category, or summary measures of exposure<br><i>Cross-sectional study</i> —Report numbers of outcome events or summary measures                                                           |
| Main results                 | 10      | (a) Give unadjusted estimates and, if applicable, confounder-adjusted estimates and their precision (eg, 95% confidence interval). Make clear which confounders were adjusted for and why they were included                                                                                                                                |

1  
2  
3  
4  
5  
6  
7  
8  
9  
10  
11  
12  
13  
14  
15  
16  
17  
18  
19  
20  
21  
22

(b) Report category boundaries when continuous variables were categorized

(c) If relevant, consider translating estimates of relative risk into absolute risk for a meaningful time period

---

|                |       |                                                                                                |
|----------------|-------|------------------------------------------------------------------------------------------------|
| Other analyses | 10-11 | Report other analyses done—eg analyses of subgroups and interactions, and sensitivity analyses |
|----------------|-------|------------------------------------------------------------------------------------------------|

---

**Discussion**

|                  |       |                                                                                                                                                                            |
|------------------|-------|----------------------------------------------------------------------------------------------------------------------------------------------------------------------------|
| Key results      | 11    | Summarise key results with reference to study objectives                                                                                                                   |
| Limitations      | 12-13 | Discuss limitations of the study, taking into account sources of potential bias or imprecision. Discuss both direction and magnitude of any potential bias                 |
| Interpretation   | 11-13 | Give a cautious overall interpretation of results considering objectives, limitations, multiplicity of analyses, results from similar studies, and other relevant evidence |
| Generalisability | 13    | Discuss the generalisability (external validity) of the study results                                                                                                      |

---

**Other information**

|         |    |                                                                                                                                                               |
|---------|----|---------------------------------------------------------------------------------------------------------------------------------------------------------------|
| Funding | 13 | Give the source of funding and the role of the funders for the present study and, if applicable, for the original study on which the present article is based |
|---------|----|---------------------------------------------------------------------------------------------------------------------------------------------------------------|

23 \*Give information separately for cases and controls in case-control studies and, if applicable, for exposed and unexposed groups in cohort and cross-sectional studies.

24  
25  
26 **Note:** An Explanation and Elaboration article discusses each checklist item and gives methodological background and published examples of transparent reporting. The STROBE checklist is best used in conjunction with this article (freely available on the Web sites of PLoS Medicine at <http://www.plosmedicine.org/>, Annals of Internal Medicine at <http://www.annals.org/>, and Epidemiology at <http://www.epidem.com/>). Information on the STROBE Initiative is available at [www.strobe-statement.org](http://www.strobe-statement.org).

27  
28  
29  
30  
31  
32  
33  
34  
35  
36  
37  
38  
39  
40  
41  
42  
43  
44  
45  
46  
47  
48  
49  
50  
51  
52  
53  
54  
55  
56  
57  
58  
59  
60

# BMJ Open

## Association between recovery/occurrence of metabolic syndrome and rapid estimated glomerular filtration rate decline in middle-aged and older populations: evidence from the China Health and Retirement Longitudinal Study

|                                 |                                                                                                                                                                                                                                                                                                                                                                                                                                                                                                                                                   |
|---------------------------------|---------------------------------------------------------------------------------------------------------------------------------------------------------------------------------------------------------------------------------------------------------------------------------------------------------------------------------------------------------------------------------------------------------------------------------------------------------------------------------------------------------------------------------------------------|
| Journal:                        | <i>BMJ Open</i>                                                                                                                                                                                                                                                                                                                                                                                                                                                                                                                                   |
| Manuscript ID                   | bmjopen-2021-059504.R3                                                                                                                                                                                                                                                                                                                                                                                                                                                                                                                            |
| Article Type:                   | Original research                                                                                                                                                                                                                                                                                                                                                                                                                                                                                                                                 |
| Date Submitted by the Author:   | 07-Sep-2022                                                                                                                                                                                                                                                                                                                                                                                                                                                                                                                                       |
| Complete List of Authors:       | Liu, Peijia; Third Affiliated Hospital of Sun Yat-Sen University, Department of Nephrology; Guangzhou Eighth People's Hospital, Guangzhou Medical University, Department of Nephrology<br>Tang, Leile; Third Affiliated Hospital of Sun Yat-Sen University, Department of Cardiology<br>Fang, Jia; Third Affiliated Hospital of Sun Yat-Sen University, Department of Nephrology<br>Chen, Chaojin; Third Affiliated Hospital of Sun Yat-Sen University<br>Liu, Xun; Third Affiliated Hospital of Sun Yat-Sen University, Department of Nephrology |
| <b>Primary Subject Heading</b>: | Nutrition and metabolism                                                                                                                                                                                                                                                                                                                                                                                                                                                                                                                          |
| Secondary Subject Heading:      | Urology, Diabetes and endocrinology, Public health                                                                                                                                                                                                                                                                                                                                                                                                                                                                                                |
| Keywords:                       | Chronic renal failure < NEPHROLOGY, Lipid disorders < DIABETES & ENDOCRINOLOGY, PUBLIC HEALTH                                                                                                                                                                                                                                                                                                                                                                                                                                                     |
|                                 |                                                                                                                                                                                                                                                                                                                                                                                                                                                                                                                                                   |

SCHOLARONE™  
Manuscripts



I, the Submitting Author has the right to grant and does grant on behalf of all authors of the Work (as defined in the below author licence), an exclusive licence and/or a non-exclusive licence for contributions from authors who are: i) UK Crown employees; ii) where BMJ has agreed a CC-BY licence shall apply, and/or iii) in accordance with the terms applicable for US Federal Government officers or employees acting as part of their official duties; on a worldwide, perpetual, irrevocable, royalty-free basis to BMJ Publishing Group Ltd ("BMJ") its licensees and where the relevant Journal is co-owned by BMJ to the co-owners of the Journal, to publish the Work in this journal and any other BMJ products and to exploit all rights, as set out in our [licence](#).

The Submitting Author accepts and understands that any supply made under these terms is made by BMJ to the Submitting Author unless you are acting as an employee on behalf of your employer or a postgraduate student of an affiliated institution which is paying any applicable article publishing charge ("APC") for Open Access articles. Where the Submitting Author wishes to make the Work available on an Open Access basis (and intends to pay the relevant APC), the terms of reuse of such Open Access shall be governed by a Creative Commons licence – details of these licences and which [Creative Commons](#) licence will apply to this Work are set out in our licence referred to above.

Other than as permitted in any relevant BMJ Author's Self Archiving Policies, I confirm this Work has not been accepted for publication elsewhere, is not being considered for publication elsewhere and does not duplicate material already published. I confirm all authors consent to publication of this Work and authorise the granting of this licence.



1           **Association between recovery/occurrence of metabolic syndrome and rapid**  
2                           **estimated glomerular filtration rate decline in middle-aged and older**  
3           **populations: evidence from the China Health and Retirement Longitudinal**  
4                           **Study**

5           **Peijia Liu,<sup>1,2</sup> Leile Tang,<sup>3</sup> Jia fang,<sup>1</sup> Chaojin Chen,<sup>4\*</sup> Xun Liu<sup>1\*</sup>**

6           <sup>1</sup>Department of Nephrology, The Third Affiliated Hospital of Sun Yat-Sen University,  
7           Guangzhou, Guangdong, China;

8           <sup>2</sup>Department of Nephrology, The Eighth People's Hospital of Guangzhou,  
9           Guangzhou, Guangdong, China;

10          <sup>3</sup>Department of Cardiology, The Third Affiliated Hospital of Sun Yat-Sen University,  
11          Guangzhou, Guangdong, China

12          <sup>4</sup>Department of Anesthesiology, Third Affiliated Hospital of Sun Yat-sen University,  
13          Guangzhou, Guangdong, China

14  
15          **\*Correspondence to**

16          Dr Xun Liu;

17          [naturestyle@163.com](mailto:naturestyle@163.com);

18          Department of Nephrology,

19          The Third Affiliated Hospital of Sun Yat-Sen University,

20          Guangzhou, Guangdong, 510630, China

21          &

22          Dr Chaojin Chen;

23          [chenchj28@mail.sysu.edu.cn](mailto:chenchj28@mail.sysu.edu.cn);

24          Department of Anesthesiology,

25          The Third Affiliated Hospital of Sun Yat-Sen University,

26          Guangzhou, Guangdong, 510630, China

1  
2  
3  
4 27 **Abstract**

5  
6 28 **Objectives** Few studies have explored correlations between metabolic syndrome  
7  
8 29 (MetS) alterations and renal deterioration in longitudinal cohorts. We aim to  
9  
10 30 investigate associations between MetS recovery/development and rapid estimated  
11  
12 31 glomerular filtration rate (eGFR) decline in the China Health and Retirement  
13  
14 32 Longitudinal Study (CHARLS).

15  
16 33 **Design** Longitudinal cohort study.

17  
18 34 **Setting** This study is a secondary analysis of CHARLS.

19  
20 35 **Participants** After excluding individuals with age < 45 years old, eGFR < 60  
21  
22 36 ml/min/1.73m<sup>2</sup> and clinician-reported malignant tumor, heart disease, stroke or kidney  
23  
24 37 disease at baseline, 4142 participants with complete data were selected from the  
25  
26 38 CHARLS during the 4-year follow-up period (2011-2015).

27  
28 39 **Outcome measures** MetS were measured at 2011 and 2015 in CHARLS. A rapid  
29  
30 40 eGFR decline was defined as an average annual eGFR decline of > 3 ml/min/1.73m<sup>2</sup>.  
31  
32 41 The associations between rapid eGFR decline and MetS recovery/development were  
33  
34 42 analyzed using multivariable adjusted logistic models.

35  
36 43 **Results** According to MetS baseline status and follow-up, participants were divided  
37  
38 44 into four groups: (1) 2460 (59.4%) in the MetS-free group, (2) 361 (8.7%) in the  
39  
40 45 MetS-developed group, (3) 499 (12.0%) in the MetS recovery-group, and (4) 822  
41  
42 46 (19.8%) in the MetS-chronic group. When compared with the MetS-chronic group,  
43  
44 47 the multivariable adjusted odds ratio (OR) of rapid eGFR decline in the  
45  
46 48 MetS-recovery group was 0.64 (OR: 0.64; 95% confidence interval (CI): 0.45–0.90, *P*  
47  
48 49 = 0.01). In contrast, when compared with the MetS-free group, the multivariable  
49  
50 50 adjusted OR of rapid eGFR decline in the MetS-developed group was 1.00 (OR: 1.00;  
51  
52 51 95% CI: 0.73–1.38, *P* = 0.98).

53  
54 52 **Conclusions** Over the 4-year follow-up period, we found that MetS recovery was  
55  
56 53 associated with a reduced risk of rapid eGFR decline in middle-aged and older adults,  
57  
58 54 while MetS occurrence was not related to rapid eGFR decline. Recovery from MetS  
59  
60

1  
2  
3  
4 55 appeared to protect against a rapid decline in eGFR.

5  
6 56 **Keywords:** chronic renal failure; lipid disorders; public health;

7  
8 57

9  
10 58 **Strength**

11  
12 59 A high-quality data from a nationally representative longitudinal cohort was applied  
13  
14 60 to confirm the association between altered metabolic syndrome status and rapid  
15  
16 61 glomerular filtration rate decline.

17  
18 62 The metabolic syndrome scores calculated by principal component analysis was  
19  
20 63 applied for model calibration in the study.

21  
22 64 **Limitation**

23  
24 65 Some participants were missing during the follow-up, which biased the results of the  
25  
26 66 study.

27  
28 67 Blood tests related to metabolic syndrome and serum creatinine were performed only  
29  
30 68 once, resulting in data inaccuracy.

31  
32 69 The unavailability of urine tests and kidney imaging prevented the analysis of the  
33  
34 70 association between metabolic syndrome status and chronic kidney disease.  
35  
36  
37  
38  
39  
40  
41  
42  
43  
44  
45  
46  
47  
48  
49  
50  
51  
52  
53  
54  
55  
56  
57  
58  
59  
60

## 71 **Introduction**

72 Metabolic Syndrome (MetS) is a cluster of clinical characteristics related to  
73 abdominal obesity, dyslipidemia, elevated blood glucose (BG), and elevated blood  
74 pressure (BP) <sup>1-3</sup>. As of 2017, there were approximately 1 billion individuals with  
75 MetS around the world, of which China accounted for 21.7% <sup>4</sup>. In China, MetS  
76 prevalence has been undergoing a steady increase, concomitant with an increasingly  
77 aged population, an obesity epidemic, and increased diabetes and hypertension levels,  
78 which collectively pose a considerable threat to people's health and impose a heavy  
79 burden on healthcare systems <sup>4-6</sup>.

80 While investigations of causality relationships between MetS and cardiovascular  
81 events have gained considerable traction in recent years <sup>7-9</sup>, MetS also impacts the  
82 kidneys. It is accepted that the pathological mechanisms underpinning MetS mainly  
83 include insulin resistance, increased oxidative stress, and a chronic inflammatory  
84 state, which may lead to kidney degeneration and chronic kidney disease (CKD)  
85 development <sup>5 6</sup>. Previously, it was confirmed that MetS and associated components  
86 (abdominal obesity, elevated BG, elevated BP, and lipid metabolic disorder) are  
87 strongly related to CKD and a decreased estimated glomerular filtration rate (eGFR)  
88 <sup>10-14</sup>. Several longitudinal studies reported that MetS and its components were  
89 associated with incremental rapid eGFR decline and CKD incidence <sup>15-18</sup>. However,  
90 these studies failed to articulate the relationship between MetS alterations and renal  
91 function changes. This dearth of information on this subject warrants further study,  
92 especially within a Chinese population context.

93 The China Health and Retirement Longitudinal Study (CHARLS) is a prospective  
94 cohort study conducted by the National School of Development, Peking University,  
95 China <sup>19</sup>. The nationwide sample assesses the social, behavioral, and health status of  
96 individuals aged 45 and older <sup>19</sup>. The CHARLS baseline survey was implemented in  
97 2011 (Wave 1), and the samples were followed up every two years. Blood samples  
98 from populations were only collected in 2011 (Wave1) and 2015 (Wave 3). In the  
99 current study, we explored the relationship between MetS recovery/occurrence and

100 rapid eGFR decline in middle-aged and older populations in the 4-year follow-up  
101 cohort.

## 102 **Methods**

### 103 **Study population**

104 CHARLS is a nationally representative longitudinal survey on the social,  
105 economic, and health status of Chinese citizens aged  $\geq 45$  and their spouses in the  
106 community<sup>19</sup>. In total, 17,708 participants were registered at baseline (Wave 1 at  
107 2011), of which 11,847 had blood sample tests.

108 In this study, our exclusion criteria excluded participants with the following: 1)  
109 missing values; 2) without fasting blood values; 3) baseline eGFR  $< 60$   
110 ml/min/1.73m<sup>2</sup>; 4) clinician-reported malignant tumor, heart disease, stroke or kidney  
111 disease; 5)  $< 45$  years old; and 6) no follow-up records and related blood  
112 examinations in Wave 3 at 2015. After applying these criteria, 4142 participants were  
113 finally included. The participant screening process is outlined (Fig. 1).

114 The Medical Ethics Review Committee of Peking University approved this study.  
115 All participants provided written informed consent before participating. This study is  
116 a secondary analysis of a public dataset and does not require ethics approval again.

### 117 **Blood examinations**

118 At baseline (Wave 1), blood measurements and hemoglobin were assayed by the  
119 Center for Disease Control and Prevention of the local county, whereas other  
120 biochemical indicators were analyzed by Youanmen Center for Clinical Laboratory of  
121 Capital Medical University, Beijing, China. Serum creatinine (Scr) was measured by  
122 the picric acid method; blood urea nitrogen (BUN) was determined by an enzymatic  
123 UV method with urease; blood glucose (BG), total cholesterol, high density  
124 lipoprotein (HDL) cholesterol, and triglyceride (TG) were assayed by enzymatic  
125 colorimetric tests; glycosylated hemoglobin (GHbA1c) was determined by high  
126 performance liquid chromatography; high-sensitivity C-reactive protein (hs-CRP) was  
127 examined by immunoturbidimetric assay; and uric acid (UA) was determined by the

1  
2  
3  
4 128 UA plus method <sup>20</sup>. Blood specimen testing in 2015 (Wave 3) was completed by  
5  
6 129 KingMed Diagnostics, the leading third-party institution in China, which has testing  
7  
8 130 laboratories in 27 provincial-level cities nationwide. GHbA1c, Scr, HDL, TG and BG  
9  
10 131 were the required blood biomarkers from Wave 3. GHbA1c and Scr levels were  
11  
12 132 determined by the same methods as Wave 1, while HDL was determined by a direct  
13  
14 133 method, TG by an oxidase method, and BG by a hexokinase method <sup>21</sup>. The  
15  
16 134 collection, storage, transport, processing, and other blood sample details are described  
17  
18 135 elsewhere <sup>20 21</sup>. Of note, the models and manufacturer information of blood test  
19  
20 136 instruments in Wave 1 and Wave 3 were not available. All inspections and  
21  
22 137 calibrations were performed by trained personnel.

### 138 **Definition and grouping of MetS**

139 Currently, there was no unified definition for MetS. The World Health  
140  
141 Origination (WHO) diagnostic criteria proposed in 1999, the National Cholesterol  
142  
143 Education Program Adult Panel III (ATP III ) diagnostic criteria proposed in 2005,  
144  
145 and International Diabetes Federation (IDF) diagnostic criteria proposed in 2006 were  
146  
147 commonly used for metabolic syndrome <sup>22</sup>. These diagnostic criteria basically related  
148  
149 to abdominal obesity, dyslipidemia, glucose metabolism disorder, and elevated blood  
150  
151 pressure. However, these diagnostic criteria had different views and cut-off values for  
152  
153 some specific indicators. This study adopted the 2018 China Guidelines for the  
154  
155 Prevention and Treatment of Hypertension (CGPTH) definition for MetS, which was  
156  
157 similar to the ATP III diagnostic criteria <sup>2</sup>. Compared with ATP III diagnostic criteria,  
158  
159 the cut points of waist circumference defined by CGPTH were smaller and more  
160  
161 suitable for the Chinese population. According to the 2018 CGPTH definition, MetS  
162  
163 was diagnosed when three of the following four conditions were met: 1) Central  
164  
165 obesity: waist circumference (WC)  $\geq 90$  cm in men and  $\geq 85$  cm in women; 2)  
166  
167 Elevated BP: systolic blood pressure (SBP)  $\geq 130$  mmHg or diastolic blood pressure  
168  
169 (DBP)  $\geq 85$  mmHg, or diagnosed as hypertension and treated; 3) Dyslipidemia:  
170  
171 fasting TG  $\geq 150$  mg/dL, or HDL  $\leq 40$  mg/dL, or diagnosed as dyslipidemia and

156 treated; and 4) Elevated BG: Fasting BG (FBG)  $\geq$  100 mg/dL, or 2 h postprandial BG  
 157  $\geq$  100 mg/dL, or diagnosed as diabetes and treated<sup>2</sup>. Diabetes was defined as fasting  
 158 BG  $\geq$  126 mg/dL, and/or HbA1c  $\geq$  6.5%, and/or a self-reported history of diabetes<sup>23</sup>.  
 159 Of note, we did not have 2 h postprandial BG data.

160 According to MetS baseline status and follow-up, participants were categorized  
 161 into 1) MetS-free, 2) MetS-developed, 3) MetS-recovery, and 4) MetS-chronic  
 162 groups.

### 163 **Study outcomes**

164 We calculated eGFR values using the 2012 Chronic Kidney Disease  
 165 Epidemiology Collaboration equation based on creatinine levels<sup>24</sup>. A rapid eGFR  
 166 decline was defined as an average annual eGFR decline of  $> 3$  ml/min/1.73m<sup>2</sup><sup>16 25</sup>. In  
 167 this study, we defined a rapid eGFR decline as the eGFR in Wave 3 minus the eGFR  
 168 in Wave 1,  $> 12$  ml/min/1.73m<sup>2</sup>.

### 169 **MetS scores**

170 MetS severity potentially affects the recovery or occurrence of MetS. For  
 171 instance, individuals with high MetS severity may be less liable to recover. Similarly,  
 172 for those without MetS, it is not straightforward to progress to severe MetS.  
 173 Therefore, MetS scores were introduced to assess MetS severity in the study, which  
 174 was thought to be more sufficient and accurate than other ways using the number of  
 175 symptoms and complications to reflect MetS severity<sup>26 27</sup>. These scores were  
 176 calculated using principal component (PC) analysis of WC, mean arterial pressure  
 177 (MAP), FBG, fasting TG, and the inverse HDL values. All MetS related variables  
 178 were normalized by 0–1. According to the PC analysis results, PC1 and PC2  
 179 explained 38.9% and 20.9% of the variance, respectively. MetS scores were  
 180 calculated as follows:

$$181 \quad PC1 = 0.369 \times WC + 0.378 \times FBG + 0.585 \times TG + 0.562 \times \left(\frac{1}{HDL}\right) + 0.252 \times MAP,$$

$$182 \quad PC2 = 0.503 \times WC - 0.171 \times FBG - 0.268 \times TG - 0.274 \times \left(\frac{1}{HDL}\right) + 0.755 \times MAP,$$

$$183 \quad \text{MetS score} = 0.389 \times PC1 + 0.209 \times PC2$$

## 184 **Other covariates**

185 All potential covariates were all collected at baseline in Wave 1, including gender  
186 (male vs. female), age, marital status (married with spouse vs. others), education  
187 (illiterate, middle school and below, or high school and above), household per capita  
188 income, smoking (yes vs. no), drinking (yes vs. no), eGFR, grip strength, height,  
189 weight, body mass index (BMI), WC, SBP, DBP, MAP, depressive symptom (yes vs.  
190 no), self-reporting disease (hypertension, diabetes, dyslipidemia and ), and  
191 corresponding medication. We categorized eGFR into two groups: 60–89 and  $\geq 90$ .  
192 Grip strength was divided into three groups (T1, T2, and T3) according to the  
193 one-third percentile. BMI was calculated by weight (kg)/height squared ( $m^2$ ). The BP  
194 of each participant was measured three times every 45–60 s with the Omron<sup>TM</sup>  
195 HEM-7112 sphygmomanometer (Omron Co. LTD, Dalian, China) at rest. Both SBP  
196 and DBP were averaged from three measurements. MAP was defined as  $MAP = 1/3 \times$   
197  $SBP + 2/3 \times DBP$ . Previous study demonstrated that depressive symptom was  
198 association with baseline eGFR<sup>28</sup>. Thus, we should not overlook this variable. The  
199 10-item Center for Epidemiological Studies Depression Scale (CESD-10) was applied  
200 in the study<sup>29</sup>. A CESD-10 score  $\geq 10$  was grouped into the depressive symptom  
201 group, and  $< 10$  into the non-depressive symptom group. Self-reporting disease was  
202 disease diagnosed by a doctor. Medical interventions included taking Chinese  
203 traditional and Western modern medicines.

## 204 **Statistical methods**

205 The Kolmogorov-Smirnov test was used to test the normality of continuous  
206 variables. Continuous variables were expressed by the median (interquartile range)  
207 and categorical variables by frequency (%). The Mann-Whitney U test was performed  
208 on continuous variables, and categorical variables between the rapid eGFR decline  
209 group and the non-rapid eGFR decline group were tested by the Chi-square test. In  
210 preliminary analyses, variables with P values  $< 0.15$  were used to calibrate the logistic  
211 model. Continuous variables not presenting a linear relationship with the logit



1  
2  
3  
4 212 conversion value of the dependent variable were converted to categorical variables.  
5  
6 213 Tolerance and variance inflation factors (VIFs) were used to test for collinearity. This  
7  
8 214 existed if the tolerance was  $< 0.1$  or the VIF was  $> 10$ . Eventually, age, sex, BMI, Scr,  
9  
10 215 hemoglobin, eGFR classification, grip strength classification and MetS scores were  
11  
12 216 selected as confounding variables for model adjustments in this study. Most selected  
13  
14 217 covariates have been reported to be related to renal events<sup>26 30-33</sup>. Univariate analysis  
15  
16 218 of variables between eGFR decline group and non-rapid eGFR decline group were  
17  
18 219 carried out. Logistic models were used to test the association between MetS  
19  
20 220 recovery/occurrence and eGFR rapid decline after adjusting for multiple confounding  
21  
22 221 factors. Furthermore, alterations in MetS status were accompanied by changes of  
23  
24 222 diagnostic conditions (elevated blood glucose, elevated blood pressure, central obesity  
25  
26 223 and dyslipidemia). As a result, logistic models were used to explore the relationship  
27  
28 224 between the recovery/occurrence of MetS components and the rapid decline of eGFR  
29  
30 225 using different adjustments of confounding factors, respectively.  $P < 0.05$  was  
31  
32 226 considered statistically significant (two-sided test). Statistics were generated in IBM  
33  
34 227 SPSS 20.0 software (IBM Corp, Armonk, NY, USA) and StataMP 16 software  
35  
36 228 (StataCorp, Texas, USA).

### 38 229 **Patient and public involvement**

40 230 There were no participants involved in the development. The results of the  
41  
42 231 survey are disseminated to the public through websites.  
43  
44 232

## 46 233 **Results**

### 48 234 **Participant characteristics**

50 235 As shown (Fig. 1), 4142 participants were selected, including 2460 (59.4%) in the  
51  
52 236 MetS-free group, 361 (8.7%) in the MetS-developed group, 499 (12.0%) in the MetS  
53  
54 237 recovery-group, and 822 (19.8%) in the MetS-chronic group. Comparison of the basic  
55  
56 238 characteristics between the 4142 enrolled participants and 2974 ones that excluded  
57  
58 239 during follow-up were shown in Supplemental Table 1.  
60

Participant characteristics were grouped by the eGFR decline rate (Table 1). A rapid decline in eGFR developed in 711 (17.2%) participants during the 4-year follow-up. The median age was 58 (52~64) years and males accounted for 42.5% at baseline. In contrast to rapid eGFR decline group, the non-rapid eGFR decline group was significantly higher with respect to FBG, Scr, hemoglobin, eGFR, weight, BMI, WC, MetS scores, central obesity, and elevated BG (all  $P < 0.05$ ). Those in non-rapid eGFR decline group were more likely to be female and younger when compared with the eGFR decline group (both  $P < 0.05$ ).

#### **Rapid eGFR decline odds based on Mets recovery or occurrence**

Univariate analysis was conducted to select covariates for correction (Supplemental Table 2). As shown (Table 2), after adjustment for age, sex, BMI, Scr, hemoglobin, eGFR classification, grip strength classification, and MetS scores, the odds ratio (OR) of rapid eGFR decline in the MetS-recovery group was 0.64 (OR: 0.64; 95% CI: 0.45–0.90,  $P = 0.01$ ) when compared with the MetS-chronic group. In contrast, after adjustment for age, sex, BMI, serum creatinine, hemoglobin, eGFR classification, grip strength classification, and MetS score, the OR of rapid eGFR decline in the MetS-developed group was 1.00 (OR: 1.00; 95% CI: 0.73–1.38,  $P = 0.98$ ) when compared with the MetS-free group.

#### **MetS components and rapid eGFR decline odds**

The association of changes in the composition of MetS groups with rapid eGFR decline is shown (Table 3). In the baseline MetS population, after adjustment for age, sex, BMI, serum creatinine, hemoglobin, eGFR classification, grip strength classification, and MetS score, the OR of rapid eGFR decline in the population recovered from central obesity was 0.31 (OR: 0.31; 95% CI: 0.15–0.65,  $P < 0.01$ ) when compared with chronic central obesity, whereas recovery from elevated BP, dyslipidemia, and elevated BG did not show statistically significant differences when compared with the corresponding population (all  $P > 0.05$ ). In the baseline population without MetS, we observed no statistical difference in the rapid decline of eGFR

268 between the occurrence of all MetS component groups and corresponding contrast  
269 groups (all  $P > 0.05$ ). This was consistent with the overall trend.

## 270 **Discussion**

271 We examined the relationship between MetS changes and rapid eGFR decline in  
272 a large nationwide cohort. At the 4-year follow-up, MetS recovery was significantly  
273 associated with a reduced risk of rapid eGFR decline in the middle-aged and elderly,  
274 with only WC recovery consistent with the overall trend. The occurrence of MetS and  
275 its components did not significantly increase the risk of rapid eGFR decline. Further  
276 follow-up is required to elucidate the relationship between MetS dynamics and the  
277 rapid decline in eGFR.

278 Longitudinal cohort studies in several Asian countries concluded that MetS  
279 increased the risk of CKD, although follow-up times varied from study to study<sup>15-18</sup>  
280<sup>34</sup>. However, the effect of MetS on the rapid decline of eGFR remains controversial.  
281 In a 3-year cohort, Cheng *et al.* found no significant correlations between MetS and  
282 eGFR rapid decline in the elderly<sup>34</sup>. However, other studies reported that baseline  
283 MetS was associated with a decline in eGFR and even acted as an independent  
284 predictor of eGFR decline<sup>16-18</sup>. Wu *et al.* investigated the association between the  
285 MetS severity score and kidney function, and found that the MetS severity score was  
286 an independent risk factor for the CKD development and progressive eGFR decline,  
287 although the definition of rapid eGFR decline was different from this study<sup>26</sup>. Here,  
288 the MetS severity score was a continuous variable that was primarily used to calibrate  
289 the MetS (yes vs. no). We noted that none of the aforementioned studies accounted  
290 for the MetS status of participants during follow-up periods. In a 4-year follow-up  
291 cohort, Park *et al.* explored the relationship between MetS status change and CKD  
292 events and concluded that MetS recovery was associated with a decreased risk of  
293 CKD incidence, but the occurrence of MetS increased the risk of CKD incidence<sup>35</sup>.  
294 One of the highlights of the article was to observe the status of MetS three times over  
295 a 4-year period, thereby making the MetS diagnosis more robust. However, Park *et al.*

1  
2  
3  
4 296 did not discuss the association with the rapid eGFR decline. In this study, we  
5  
6 297 concluded that MetS recovery was associated with a reduced risk of rapid eGFR  
7  
8 298 decline, while MetS occurrence was not related to rapid eGFR decline. It should be  
9  
10 299 emphasized that we need to be cautious about the conclusion between the MetS  
11  
12 300 occurrence and the rapid eGFR decline in this study. Because the follow-up time was  
13  
14 301 short and the timing of MetS onset was unknown, the impairment of renal function  
15  
16 302 caused by MetS may not have occurred in some populations. To sum up, studies  
17  
18 303 exploring the relationship between MetS dynamic changes and the rapid decline of  
19  
20 304 eGFR in the Chinese population are rare. Our investigation of the relationship  
21  
22 305 between MetS recovery/occurrence and eGFR rapid decline in a large nationwide  
23  
24 306 cohort may support renal function management in individuals with MetS.

25  
26 307 The effect of MetS on renal function is complex, thus, no definitive mechanisms  
27  
28 308 can explain our study observations. The evidence suggests that every component of  
29  
30 309 MetS is associated with adverse renal events (10-14). It is accepted that hypertension  
31  
32 310 and diabetes play pivotal roles in CKD development and progression<sup>36-38</sup>. Also, lipid  
33  
34 311 metabolism dysregulation and abnormal lipid distribution can lead to  
35  
36 312 lipotoxicity-related renal damage<sup>39 40</sup>. Thus, MetS may result from the combined  
37  
38 313 effects of central obesity, increased BP, insulin resistance, and blood lipid disorder,  
39  
40 314 leading to physiopathological lipotoxicity, oxidative stress increments, endothelial  
41  
42 315 dysfunction, elevated inflammation, and apoptosis, which would contribute to kidney  
43  
44 316 dysfunction<sup>5 39</sup>. However, the relationship between MetS components and the weight  
45  
46 317 of each factor on kidney injury remain unclear.

47  
48 318 Our study had some limitations. Firstly, MetS diagnoses were not  
49  
50 319 comprehensively checked (using multiple tests), and the exact timing of the MetS  
51  
52 320 alteration is unknown. Secondly, renal stone disease, epiculopathy, epiculoepicardial  
53  
54 321 disease or acute urinary tract infection are related to the occurrence and development  
55  
56 322 of renal disease. Unfortunately, urine or kidney ultrasound results were unavailable in  
57  
58 323 CHARLS cohort. Thirdly, CKD occurrence was not included as a study outcome  
59  
60

1  
2  
3  
4 324 because of the lack of urine test results, which would underestimate the CKD  
5  
6 325 incidence. Fourthly, blood analyses from Wave 1 and Wave 3 were performed at a  
7  
8 326 different testing center, with inconsistent HDL, TG, and BG measurement methods,  
9  
10 327 therefore, measurement errors may have occurred. Fifthly, a large proportion of  
11  
12 328 individuals were excluded due to exclusion criteria or missing values, and the basic  
13  
14 329 characteristics between the 4142 enrolled participants and 2974 ones that excluded  
15  
16 330 during follow-up might have biased some of our results. Sixthly, we did not establish  
17  
18 331 a model with all 4 MetS change groups included in the study.

## 332 **Conclusions**

333 Over a 4-year follow-up, we observed that MetS recovery, including recovery of  
334 central obesity, was associated with a reduced risk of rapid eGFR decline in  
335 middle-aged and older adults, while MetS occurrence was not related to rapid eGFR  
336 decline. Reversing MetS, especially central obesity, might benefit the kidney function  
337 in MetS population. But, further follow-up studies are required to observe the  
338 relationship between MetS alterations and adverse renal events.

339 **Contributors** PL and LT contributed equally to this paper. PL, LT and JF—analysis  
340 and interpretation of data and preparation of the manuscript. XL—study concept and  
341 design, and preparation and critical review of the manuscript. CC—critical review and  
342 statistical guidance of the revised manuscript. All authors have approved the final  
343 manuscript.

344 **Competing interests** All authors declared no competing interests.

345 **Funding** This work was supported by Guangzhou Municipal Science and Technology  
346 Bureau (202002020047) and Legal and Ethical Compliance Standards for Data Use in  
347 Clinical Research on Major Chronic Diseases Based on Data Security  
348 (2018YFC1315403).

349 **Data availability statement** CHARLS data of the study will be available to  
350 investigators at the CHARLS website (<http://charls.pku.edu.cn/en>).

1  
2  
3  
4 351 **Ethics statement** The Medical Ethics Review Committee of Peking University  
5  
6 352 approved this study and all participants provided written informed consent before  
7  
8 353 participating. This study is a secondary analysis of a public dataset and does not  
9  
10 354 require ethics approval again.

11  
12 355 **Acknowledgements** The authors are grateful to the China Health and Retirement  
13  
14 356 Longitudinal Study (CHARLS) team for providing the data.

## 17 357 **References**

- 19 358 1. Alberti KG, Zimmet P, Shaw J. The metabolic syndrome--a new worldwide definition. *Lancet*  
20 359 *(London, England)* 2005;366(9491):1059-62. doi: 10.1016/s0140-6736(05)67402-8 [published  
21 360 Online First: 2005/09/27]
- 23 361 2. 2018 Chinese Guidelines for Prevention and Treatment of Hypertension-A report of the Revision  
24 362 Committee of Chinese Guidelines for Prevention and Treatment of Hypertension. *Journal of*  
25 363 *geriatric cardiology : JGC* 2019;16(3):182-241. doi: 10.11909/j.issn.1671-5411.2019.03.014  
26 364 [published Online First: 2019/05/14]
- 28 365 3. Huang PL. A comprehensive definition for metabolic syndrome. *Disease models & mechanisms*  
29 366 2009;2(5-6):231-7. doi: 10.1242/dmm.001180 [published Online First: 2009/05/02]
- 31 367 4. Saklayen MG. The Global Epidemic of the Metabolic Syndrome. *Current hypertension reports*  
32 368 2018;20(2):12. doi: 10.1007/s11906-018-0812-z [published Online First: 2018/02/27]
- 34 369 5. McCracken E, Monaghan M, Sreenivasan S. Pathophysiology of the metabolic syndrome. *Clinics in*  
35 370 *dermatology* 2018;36(1):14-20. doi: 10.1016/j.clindermatol.2017.09.004 [published Online  
36 371 First: 2017/12/16]
- 38 372 6. Zhang X, Lerman LO. The metabolic syndrome and chronic kidney disease. *Translational research : the journal of laboratory and clinical medicine* 2017;183:14-25. doi:  
39 373 10.1016/j.trsl.2016.12.004 [published Online First: 2016/12/28]
- 42 375 7. Lee EY, Han K, Kim DH, et al. Exposure-weighted scoring for metabolic syndrome and the risk of  
43 376 myocardial infarction and stroke: a nationwide population-based study. *Cardiovascular*  
44 377 *diabetology* 2020;19(1):153. doi: 10.1186/s12933-020-01129-x [published Online First:  
45 378 2020/10/01]
- 47 379 8. Guembe MJ, Fernandez-Lazaro CI, Sayon-Orea C, et al. Risk for cardiovascular disease associated  
48 380 with metabolic syndrome and its components: a 13-year prospective study in the RIVANA  
49 381 cohort. *Cardiovascular diabetology* 2020;19(1):195. doi: 10.1186/s12933-020-01166-6  
50 382 [published Online First: 2020/11/24]
- 53 383 9. Hoang K, Zhao Y, Gardin JM, et al. LV Mass as a Predictor of CVD Events in Older Adults With and  
54 384 Without Metabolic Syndrome and Diabetes. *JACC Cardiovascular imaging* 2015;8(9):1007-15.  
55 385 doi: 10.1016/j.jcmg.2015.04.019 [published Online First: 2015/09/01]
- 57 386 10. Xie K, Bao L, Jiang X, et al. The association of metabolic syndrome components and chronic kidney  
58 387 disease in patients with hypertension. *Lipids Health Dis* 2019;18(1):229. doi:  
59 388 10.1186/s12944-019-1121-5 [published Online First: 2019/12/29]

- 1  
2  
3 389 11. Viazzi F, Piscitelli P, Giorda C, et al. Metabolic syndrome, serum uric acid and renal risk in patients  
4 390 with T2D. *PLoS one* 2017;12(4):e0176058. doi: 10.1371/journal.pone.0176058 [published  
5 391 Online First: 2017/04/20]
- 6 392 12. Chen J, Kong X, Jia X, et al. Association between metabolic syndrome and chronic kidney disease in  
7 393 a Chinese urban population. *Clin Chim Acta* 2017;470:103-08. doi: 10.1016/j.cca.2017.05.012  
8 394 [published Online First: 2017/05/16]
- 9 395 13. Thomas G, Sehgal AR, Kashyap SR, et al. Metabolic syndrome and kidney disease: a systematic  
10 396 review and meta-analysis. *Clinical journal of the American Society of Nephrology : CJASN*  
11 397 2011;6(10):2364-73. doi: 10.2215/cjn.02180311 [published Online First: 2011/08/20]
- 12 398 14. Chang IH, Han JH, Myung SC, et al. Association between metabolic syndrome and chronic kidney  
13 399 disease in the Korean population. *Nephrology (Carlton, Vic)* 2009;14(3):321-6. doi:  
14 400 10.1111/j.1440-1797.2009.01091.x [published Online First: 2009/05/16]
- 15 401 15. Hu Y, Shi LX, Zhang Q, et al. Increased Risk of Chronic Kidney Diseases in Patients with Metabolic  
16 402 Syndrome: A 3-year Prospective Cohort Study. *Current medical science* 2019;39(2):204-10.  
17 403 doi: 10.1007/s11596-019-2020-8 [published Online First: 2019/04/25]
- 18 404 16. Huh JH, Yadav D, Kim JS, et al. An association of metabolic syndrome and chronic kidney disease  
19 405 from a 10-year prospective cohort study. *Metabolism: clinical and experimental*  
20 406 2017;67:54-61. doi: 10.1016/j.metabol.2016.11.003 [published Online First: 2017/01/14]
- 21 407 17. Hayashi K, Takayama M, Abe T, et al. Investigation of Metabolic Factors Associated with eGFR  
22 408 Decline Over 1 Year in a Japanese Population without CKD. *Journal of atherosclerosis and*  
23 409 *thrombosis* 2017;24(8):863-75. doi: 10.5551/jat.38612 [published Online First: 2017/01/27]
- 24 410 18. Kawamoto R, Akase T, Ninomiya D, et al. Metabolic syndrome is a predictor of decreased renal  
25 411 function among community-dwelling middle-aged and elderly Japanese. *International*  
26 412 *urology and nephrology* 2019;51(12):2285-94. doi: 10.1007/s11255-019-02320-0 [published  
27 413 Online First: 2019/10/24]
- 28 414 19. Zhao Y, Hu Y, Smith JP, et al. Cohort profile: the China Health and Retirement Longitudinal Study  
29 415 (CHARLS). *Int J Epidemiol* 2014;43(1):61-8. doi: 10.1093/ije/dys203 [published Online First:  
30 416 2012/12/18]
- 31 417 20. Zhao Y, Crimmins E, Hu P, et al. ChinaHealth and Retirement Longitudinal Study: 2011–2012  
32 418 National BaselineUsers' Guide. *Beijing, China: National School of Development, Peking*  
33 419 *University* 2013
- 34 420 21. Chen X, Crimmins E, Hu PP, et al. Venous Blood-Based Biomarkers in the China Health and  
35 421 Retirement Longitudinal Study: Rationale, Design, and Results From the 2015 Wave.  
36 422 *American journal of epidemiology* 2019;188(11):1871-77. doi: 10.1093/aje/kwz170  
37 423 [published Online First: 2019/08/01]
- 38 424 22. Alberti KG, Eckel RH, Grundy SM, et al. Harmonizing the metabolic syndrome: a joint interim  
39 425 statement of the International Diabetes Federation Task Force on Epidemiology and  
40 426 Prevention; National Heart, Lung, and Blood Institute; American Heart Association; World  
41 427 Heart Federation; International Atherosclerosis Society; and International Association for the  
42 428 Study of Obesity. *Circulation* 2009;120(16):1640-5. doi: 10.1161/circulationaha.109.192644  
43 429 [published Online First: 2009/10/07]
- 44 430 23. Classification and Diagnosis of Diabetes: Standards of Medical Care in Diabetes-2021. *Diabetes*

- 1  
2  
3 431 *Care* 2021;44(Suppl 1):S15-s33. doi: 10.2337/dc21-S002 [published Online First: 2020/12/11]  
4 432 24. Inker LA, Schmid CH, Tighiouart H, et al. Estimating glomerular filtration rate from serum  
5 433 creatinine and cystatin C. *The New England journal of medicine* 2012;367(1):20-9. doi:  
6 434 10.1056/NEJMoa1114248  
7  
8 435 25. Lindeman RD, Tobin J, Shock NW. Longitudinal studies on the rate of decline in renal function with  
9 436 age. *Journal of the American Geriatrics Society* 1985;33(4):278-85. doi:  
10 437 10.1111/j.1532-5415.1985.tb07117.x [published Online First: 1985/04/01]  
11  
12 438 26. Wu M, Shu Y, Wang L, et al. Metabolic syndrome severity score and the progression of CKD.  
13 439 *European journal of clinical investigation* 2021:e13646. doi: 10.1111/eci.13646 [published  
14 440 Online First: 2021/07/02]  
15  
16 441 27. Wijndaele K, Beunen G, Duvigneaud N, et al. A continuous metabolic syndrome risk score: utility  
17 442 for epidemiological analyses. *Diabetes Care* 2006;29(10):2329. doi: 10.2337/dc06-1341  
18 443 [published Online First: 2006/09/28]  
19  
20 444 28. Jia F, Li X, Liu F, et al. Association of renal function and depressive symptoms: Evidence from the  
21 445 China health and retirement longitudinal study. *Journal of psychosomatic research*  
22 446 2020;137:110224. doi: 10.1016/j.jpsychores.2020.110224 [published Online First:  
23 447 2020/08/31]  
24  
25 448 29. Irwin M, Artin KH, Oxman MN. Screening for depression in the older adult: criterion validity of the  
26 449 10-item Center for Epidemiological Studies Depression Scale (CES-D). *Archives of internal*  
27 450 *medicine* 1999;159(15):1701-4. doi: 10.1001/archinte.159.15.1701 [published Online First:  
28 451 1999/08/17]  
29  
30 452 30. Ma X, Zhang C, Su H, et al. Increasing Body Mass Index Predicts Rapid Decline in Renal Function: A  
31 453 5 Year Retrospective Study. *Hormone and metabolic research = Hormon- und*  
32 454 *Stoffwechselforschung = Hormones et metabolisme* 2018;50(7):556-61. doi:  
33 455 10.1055/a-0599-6360 [published Online First: 2018/05/03]  
34  
35 456 31. Meguro S, Tomita M, Kabeya Y, et al. Factors Associated with the Decline of Kidney Function Differ  
36 457 among eGFR Strata in Subjects with Type 2 Diabetes Mellitus. *International journal of*  
37 458 *endocrinology* 2012;2012:687867. doi: 10.1155/2012/687867 [published Online First:  
38 459 2013/01/15]  
39  
40 460 32. Deicher R, Hörl WH. Anaemia as a risk factor for the progression of chronic kidney disease. *Current*  
41 461 *opinion in nephrology and hypertension* 2003;12(2):139-43. doi:  
42 462 10.1097/00041552-200303000-00003 [published Online First: 2003/02/18]  
43  
44 463 33. Young BA, Katz R, Boulware LE, et al. Risk Factors for Rapid Kidney Function Decline Among African  
45 464 Americans: The Jackson Heart Study (JHS). *Am J Kidney Dis* 2016;68(2):229-39. doi:  
46 465 10.1053/j.ajkd.2016.02.046 [published Online First: 2016/04/14]  
47  
48 466 34. Cheng HT, Huang JW, Chiang CK, et al. Metabolic syndrome and insulin resistance as risk factors  
49 467 for development of chronic kidney disease and rapid decline in renal function in elderly. *The*  
50 468 *Journal of clinical endocrinology and metabolism* 2012;97(4):1268-76. doi:  
51 469 10.1210/jc.2011-2658 [published Online First: 2012/02/18]  
52  
53 470 35. Park S, Lee S, Kim Y, et al. Reduced risk for chronic kidney disease after recovery from metabolic  
54 471 syndrome: A nationwide population-based study. *Kidney research and clinical practice*  
55 472 2020;39(2):180-91. doi: 10.23876/j.krccp.20.016 [published Online First: 2020/04/30]  
56  
57  
58  
59  
60



- 1  
2  
3 473 36. Webster AC, Nagler EV, Morton RL, et al. Chronic Kidney Disease. *Lancet (London, England)*  
4 474 2017;389(10075):1238-52. doi: 10.1016/s0140-6736(16)32064-5 [published Online First:  
5 475 2016/11/27]  
6  
7 476 37. Tonneijck L, Muskiet MH, Smits MM, et al. Glomerular Hyperfiltration in Diabetes: Mechanisms,  
8 477 Clinical Significance, and Treatment. *J Am Soc Nephrol* 2017;28(4):1023-39. doi:  
9 478 10.1681/asn.2016060666 [published Online First: 2017/02/02]  
10  
11 479 38. Ruiz-Ortega M, Rayego-Mateos S, Lamas S, et al. Targeting the progression of chronic kidney  
12 480 disease. *Nature reviews Nephrology* 2020;16(5):269-88. doi: 10.1038/s41581-019-0248-y  
13 481 [published Online First: 2020/02/16]  
14  
15 482 39. Kim Y, Park CW. Can management of the components of metabolic syndrome modify the course  
16 483 of chronic kidney disease? *Kidney research and clinical practice* 2020;39(2):118-20. doi:  
17 484 10.23876/j.krcp.20.066 [published Online First: 2020/06/12]  
18  
19 485 40. D'Agati VD, Chagnac A, de Vries AP, et al. Obesity-related glomerulopathy: clinical and pathologic  
20 486 characteristics and pathogenesis. *Nature reviews Nephrology* 2016;12(8):453-71. doi:  
21 487 10.1038/nrneph.2016.75 [published Online First: 2016/06/07]  
22  
23 488

25 **Table 1. Baseline characteristics of participants between rapid eGFR decline group and non-rapid eGFR decline group**

| Characteristics                    | Overall<br>(n = 4142) | Rapid eGFR decline<br>(n = 711) | Non-rapid eGFR decline<br>(n = 3431) | P value |
|------------------------------------|-----------------------|---------------------------------|--------------------------------------|---------|
| Male [n (%)]                       | 1874 (45.2)           | 351 (49.4)                      | 1523 (44.4)                          | 0.02    |
| Age (years)                        | 58 (52~64)            | 59 (52~66)                      | 58 (52~64)                           | 0.02    |
| Married with spouse [n (%)]        | 3548 (87.5)           | 610 (85.8)                      | 2938 (85.6)                          | 0.91    |
| Education                          |                       |                                 |                                      |         |
| Illiterate [n (%)]                 | 1206 (29.1)           | 191 (26.9)                      | 1015 (29.6)                          |         |
| Middle school and below [n (%)]    | 1770 (41.2)           | 309 (43.5)                      | 1398 (40.7)                          | 0.28    |
| High school and above [n (%)]      | 1229 (29.7)           | 211 (29.7)                      | 1018 (29.7)                          |         |
| Household per capita income (yuan) | 6461.0                | 6000.0                          | 6560.0                               | 0.20    |
| M (P25~P75)                        | (2336.7~13487.5)      | (1866.7~13490.0)                | (2450.0~13486.7)                     |         |
| Drink [n (%)]                      | 1470 (32.2)           | 234 (32.9)                      | 1173 (34.2)                          | 0.51    |
| Smoke [n (%)]                      | 1567 (37.8)           | 272 (38.3)                      | 1295 (37.7)                          | 0.80    |
| Blood urea nitrogen (mg/dl)        | 15.0 (12.5~17.8)      | 15.1 (12.6~18.2)                | 15.0 (12.5~17.7)                     | 0.18    |
| Fasting glucose (mg/dl)            | 102.4 (94.9~111.2)    | 100.6 (93.4~109.8)              | 102.4 (95.2~111.4)                   | 0.001   |
| Creatinine (mg/dl)                 | 0.75 (0.64~0.84)      | 0.71 (0.60~0.84)                | 0.76 (0.64~0.86)                     | <0.001  |
| Total cholesterol (mg/dl)          | 190.6 (168.6~215.8)   | 189.8 (164.7~215.3)             | 190.6 (169.3~216.1)                  | 0.20    |
| Triglyceride (mg/dl)               | 105.3 (74.3~148.7)    | 101.8 (71.7~146)                | 106.2 (74.3~148.7)                   | 0.23    |
| HDL cholesterol (mg/dl)            | 49.1 (41.0~59.5)      | 49.5 (41.0~59.9)                | 49.1 (41.0~59.5)                     | 0.81    |
| hs-CRP (mg/l)                      | 1.0 (0.5~2.0)         | 1.0 (0.6~2)                     | 1.0 (0.5~2.0)                        | 0.43    |
| GHbA1c (%)                         | 5.1 (4.9~5.4)         | 5.1 (4.9~5.4)                   | 5.1 (4.9~5.4)                        | 0.36    |
| Uric acid (mg/dl)                  | 4.2 (3.5~5.0)         | 4.2 (3.5~5.0)                   | 4.2 (3.5~5.0)                        | 0.83    |
| Hemoglobin (mg/dl)                 | 14.2 (13.1~15.5)      | 14.0 (12.8~15.1)                | 14.3 (13.1~15.5)                     | <0.001  |
| eGFR (ml/min/1.73m <sup>2</sup> )  | 95.9 (86.4~102.9)     | 97.0 (88.3~106.1)               | 95.6 (85.9~102.4)                    | <0.001  |
| eGFR group                         |                       |                                 |                                      | 0.02    |

|    |                                                     |                     |                     |                     |       |
|----|-----------------------------------------------------|---------------------|---------------------|---------------------|-------|
| 1  |                                                     |                     |                     |                     |       |
| 2  |                                                     |                     |                     |                     |       |
| 3  | 60~89 ml/min/1.73m <sup>2</sup> [ <i>n</i> (%)]     | 1368 (33.0)         | 209 (29.4)          | 1158 (33.8)         |       |
| 4  | 90~ ml/min/1.73m <sup>2</sup> [ <i>n</i> (%)]       | 2774 (67.0)         | 502 (70.6)          | 2272 (66.2)         |       |
| 5  | Grip strength (kg)                                  | 29.3 (23.8~36.5)    | 29.5 (24.9~36.2)    | 29.3 (23.5~36.7)    | 0.13  |
| 6  | Grip strength group                                 |                     |                     |                     |       |
| 7  |                                                     |                     |                     |                     |       |
| 8  | T1 [ <i>n</i> (%)]                                  | 1386 (33.5)         | 209 (29.4)          | 1177 (34.3)         |       |
| 9  | T2 [ <i>n</i> (%)]                                  | 1387 (33.5)         | 268 (37.7)          | 1199 (32.6)         | 0.01  |
| 10 | T3 [ <i>n</i> (%)]                                  | 1369 (33.1)         | 234 (32.9)          | 1135 (33.1)         |       |
| 11 |                                                     |                     |                     |                     |       |
| 12 | Height (cm)                                         | 157.7 (152.0~163.8) | 157.9 (152.0~163.7) | 157.6 (152.0~163.9) | 0.64  |
| 13 | Weight (kg)                                         | 58 (51.3~65.5)      | 57.1 (50.8~65.1)    | 58.2 (51.4~65.7)    | 0.08  |
| 14 | Body mass index (kg/m <sup>2</sup> )                | 23.2 (21~25.7)      | 22.9 (20.8~25.4)    | 23.3 (21.1~25.8)    | 0.01  |
| 15 | Waist circumference (cm)                            | 84.4 (78.0~92.0)    | 83.6 (77.0~90.2)    | 84.8 (78.1~92.0)    | <0.01 |
| 16 | Systolic blood pressure (mmHg)                      | 127 (114~141)       | 128 (114~142)       | 127 (114~141)       | 0.72  |
| 17 | Diastolic blood pressure (mmHg)                     | 75 (67~83)          | 74 (66~83)          | 75 (67~83)          | 0.41  |
| 18 | Mean arterial pressure (mmHg)                       | 92 (83~102)         | 92 (83~103)         | 92 (84~102)         | 0.76  |
| 19 | Depression symptom [ <i>n</i> (%)]                  | 1904 (46.0)         | 319 (44.9)          | 1585 (46.2)         | 0.52  |
| 20 | Self-report hypertension [ <i>n</i> (%)]            | 887 (21.4)          | 157 (22.1)          | 730 (21.3)          | 0.63  |
| 21 | Self-report dyslipidemia [ <i>n</i> (%)]            | 333 (8.0)           | 58 (8.2)            | 275 (8.0)           | 0.90  |
| 22 | Self-report diabetes or HBG [ <i>n</i> (%)]         | 191 (4.6)           | 28 (3.9)            | 163 (4.8)           | 0.35  |
| 23 | Self-report arthritis or rheumatism [ <i>n</i> (%)] | 1345 (32.5)         | 235 (33.1)          | 1110 (32.4)         | 0.71  |
| 24 | Antihypertensive therapy [ <i>n</i> (%)]            | 664 (16.0)          | 119 (16.7)          | 545 (19.5)          | 0.57  |
| 25 | Lipid-lowering therapy [ <i>n</i> (%)]              | 187 (4.5)           | 37 (5.2)            | 150 (4.4)           | 0.33  |
| 26 | Hypoglycemic therapy [ <i>n</i> (%)]                | 127 (3.1)           | 19 (2.7)            | 108 (3.1)           | 0.50  |
| 27 | Therapy for arthritis or rheumatism [ <i>n</i> (%)] | 643 (15.5)          | 116 (16.3)          | 527 (15.4)          | 0.52  |
| 28 | Metabolic syndrome [ <i>n</i> (%)]                  | 1321 (31.9)         | 207 (29.1)          | 1114 (32.5)         | 0.08  |
| 29 | MetS scores                                         | -0.1 (-0.4~0.3)     | -0.1 (-0.5~0.3)     | 0 (-0.4~0.3)        | 0.02  |
| 30 | Metabolic syndrome components                       |                     |                     |                     |       |
| 31 | Central obesity [ <i>n</i> (%)]                     | 1726 (41.7)         | 264 (37.1)          | 1462 (42.6)         | <0.01 |
| 32 | Elevated blood pressure [ <i>n</i> (%)]             | 2099 (50.7)         | 368 (51.8)          | 1731 (50.5)         | 0.52  |
| 33 | Dyslipidemia [ <i>n</i> (%)]                        | 1595 (38.5)         | 278 (39.1)          | 1317 (38.4)         | 0.72  |
| 34 | Elevated blood glucose [ <i>n</i> (%)]              | 2456 (59.3)         | 383 (53.9)          | 2073 (60.4)         | <0.01 |
| 35 | Baseline non-MetS group                             |                     |                     |                     |       |
| 36 | MetS-free [ <i>n</i> (%)]                           | 2460 (59.4)         | 444 (62.4)          | 2016 (58.8)         |       |
| 37 | MetS-developed [ <i>n</i> (%)]                      | 361 (8.7)           | 60 (8.4)            | 301 (8.8)           |       |
| 38 | Baseline MetS group                                 |                     |                     |                     |       |
| 39 | MetS-recovery [ <i>n</i> (%)]                       | 499 (12.0)          | 64 (9.0)            | 435 (12.7)          |       |
| 40 | MetS-chronic [ <i>n</i> (%)]                        | 822 (19.8)          | 143 (20.1)          | 679 (19.8)          |       |

Data are *n* (%) or median (interquartile range); HDL: high density lipoprotein; hs-CRP: high-sensitivity C-reactive protein; eGFR: estimated glomerular filtration rate; MetS: metabolic syndrome.

grip strength is divided into T1, T2 and T3 groups by one-third percentile.

489

**Table 2. Multivariate logistic regression of rapid eGFR decline between study groups**

|  | Model 1 | Model 2 |
|--|---------|---------|
|--|---------|---------|

|                          | Adjusted OR<br>(95% CI) | <i>P</i> value | Adjusted OR<br>(95% CI) | <i>P</i> value |
|--------------------------|-------------------------|----------------|-------------------------|----------------|
| Baseline MetS groups     |                         |                |                         |                |
| MetS-chronic             | ref                     |                | ref                     |                |
| MetS-recovery            | 0.68 (0.50-0.95)        | 0.02           | 0.64 (0.45-0.90)        | 0.01           |
| Baseline non-MetS groups |                         |                |                         |                |
| MetS-free                | ref                     |                | ref                     |                |
| MetS-developed           | 0.93 (0.69-1.25)        | 0.64           | 1.00 (0.73-1.38)        | 0.98           |

Model 1: additional adjusted for age and sex.

Model 2: additional adjusted for age, sex, serum creatinine, eGFR classification, grip strength classification; hemoglobin; MetS scores and body mass index.

eGFR: estimated glomerular filtration rate; CI: confidence interval; OR: odds ratio; MetS: metabolic syndrome.

490

**Table 3. Multivariate logistic regression of rapid eGFR decline between study groups according the changes of MetS components**

|                                                                                      | Model 1                 |                | Model 2                 |                |
|--------------------------------------------------------------------------------------|-------------------------|----------------|-------------------------|----------------|
|                                                                                      | Adjusted OR<br>(95% CI) | <i>P</i> value | Adjusted OR<br>(95% CI) | <i>P</i> value |
| Recovered components in baseline MetS groups (chronic MetS components as reference)  |                         |                |                         |                |
| Central obesity                                                                      | 0.29 (0.15-0.59)        | 0.01           | 0.31 (0.15-0.65)        | <0.01          |
| Elevated blood pressure                                                              | 0.80 (0.50-1.26)        | 0.33           | 0.79 (0.49-1.27)        | 0.33           |
| Elevated SBP                                                                         | 0.89 (0.61-1.31)        | 0.56           | 0.88 (0.59-1.30)        | 0.51           |
| Elevated DBP                                                                         | 0.75 (0.46-1.23)        | 0.26           | 0.68 (0.41-1.15)        | 0.15           |
| Dyslipidemia                                                                         | 1.09 (0.82-1.44)        | 0.57           | 1.05 (0.78-1.40)        | 0.77           |
| Elevated TG                                                                          | 1.22 (0.87-1.72)        | 0.26           | 1.14 (0.79-1.36)        | 0.50           |
| Decreased HDL                                                                        | 0.84 (0.59-1.12)        | 0.32           | 0.85 (0.59-1.22)        | 0.38           |
| Elevated blood glucose                                                               | 1.08 (0.87-1.34)        | 0.49           | 1.08 (0.86-1.36)        | 0.52           |
| Elevated fasting glucose                                                             | 1.14 (0.91-1.43)        | 0.25           | 1.13 (0.89-1.43)        | 0.32           |
| Developed components in baseline non-MetS groups (free MetS components as reference) |                         |                |                         |                |
| Central obesity                                                                      | 1.21 (0.92-1.59)        | 0.16           | 1.32 (0.97-1.77)        | 0.74           |
| Elevated blood pressure                                                              | 0.84 (0.63-1.13)        | 0.26           | 0.87 (0.64-1.18)        | 0.37           |
| Elevated SBP                                                                         | 0.88 (0.66-1.17)        | 0.37           | 0.92 (0.68-1.23)        | 0.56           |
| Elevated DBP                                                                         | 0.88 (0.62-1.24)        | 0.46           | 0.91 (0.63-1.30)        | 0.59           |
| Dyslipidemia                                                                         | 0.92 (0.69-1.22)        | 0.54           | 0.96 (0.72-1.30)        | 0.81           |
| Elevated TG                                                                          | 0.93 (0.70-1.25)        | 0.64           | 1.02 (0.75-1.37)        | 0.91           |
| Decreased HDL                                                                        | 1.02 (0.65-1.59)        | 0.95           | 0.97 (0.61-1.55)        | 0.91           |
| Elevated blood glucose                                                               | 1.07 (0.76-1.50)        | 0.71           | 1.07 (0.75-1.52)        | 0.71           |
| Elevated fasting glucose                                                             | 1.06 (0.74-1.51)        | 0.76           | 1.09 (0.76-1.57)        | 0.64           |

eGFR: estimated glomerular filtration rate; CI: confidence interval; OR: odds ratio; MetS: metabolic syndrome;

SBP: systolic blood pressure; DBP: diastolic blood pressure; TG: triglyceride; HDL: high density lipoprotein.

Model 1: additional adjusted for age and sex.

Model 2: additional adjusted for age, sex, serum creatinine, eGFR classification, grip strength classification,

---

hemoglobin, MetS score and body mass index.

Each Mets components run in their own model to predict rapid eGFR decline

491 Figure 1. Flowchart of participants selection. eGFR: estimated glomerular filtration  
492 rate; MetS: metabolic syndrome

493 Supplementary file

494 Table S1. Baseline characteristics of participants included and excluded in the study

495 Table S2. Univariate analysis of variables between eGFR decline group and non-rapid  
496 eGFR decline group

For peer review only

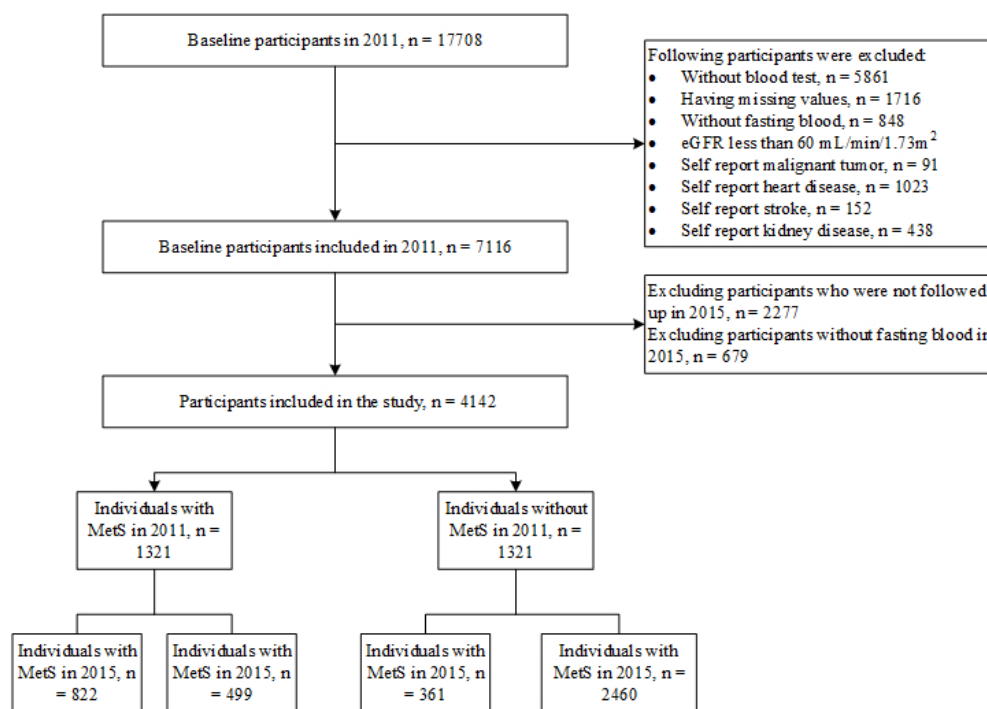

Flowchart of participants selection. eGFR: estimated glomerular filtration rate; MetS: metabolic syndrome

193x135mm (96 x 96 DPI)

1  
2  
3  
4 **Association between recovery/occurrence of metabolic syndrome and rapid estimated**  
5 **glomerular filtration rate decline in middle-aged and older populations: evidence from**  
6  
7 **the China Health and Retirement Longitudinal Study**

8  
9 **Peijia Liu,<sup>1,2</sup> Leile Tang,<sup>3</sup> Jia fang,<sup>1</sup> Chaojin Chen,<sup>4\*</sup> Xun Liu<sup>1\*</sup>**

10  
11 <sup>1</sup>Department of Nephrology, The Third Affiliated Hospital of Sun Yat-Sen University, Guangzhou,  
12  
13 Guangdong, China;

14  
15 <sup>2</sup>Department of Nephrology, The Eighth People's Hospital of Guangzhou, Guangzhou, Guangdong,  
16  
17 China;

18  
19 <sup>3</sup>Department of Cardiology, The Third Affiliated Hospital of Sun Yat-Sen University, Guangzhou,  
20  
21 Guangdong, China

22  
23 <sup>4</sup>Department of Anesthesiology, Third Affiliated Hospital of Sun Yat-sen University, Guangzhou,  
24  
25 Guangdong, China

26  
27  
28  
29 **\*Correspondence to**

30  
31 Dr Xun Liu;

32  
33 [naturestyle@163.com](mailto:naturestyle@163.com);

34  
35 Department of Nephrology,

36  
37 The Third Affiliated Hospital of Sun Yat-Sen University,

38  
39 Guangzhou, Guangdong, 510630, China

40  
41 &

42  
43 Dr Chaojin Chen;

44  
45 [chenchj28@mail.sysu.edu.cn](mailto:chenchj28@mail.sysu.edu.cn);

46  
47 Department of Anesthesiology,

48  
49 The Third Affiliated Hospital of Sun Yat-Sen University,

50  
51 Guangzhou, Guangdong, 510630, China

**Table S1. Baseline characteristics of participants included and excluded in the study**

| Characteristics                         | participants included   |                     |                     | P-value |
|-----------------------------------------|-------------------------|---------------------|---------------------|---------|
|                                         | in baseline<br>(n=7116) | group 1<br>(n=2974) | group 2<br>(n=4142) |         |
| Age (years)                             | 58 (52~65)              | 58 (52~64)          | 58 (51~66)          | 0.98    |
| Male [ <i>n</i> (%)]                    | 3332 (46.8)             | 1458 (49.0)         | 1874 (45.2)         | 0.002   |
| Married with spouse [ <i>n</i> (%)]     | 5977 (84.0)             | 2974 (81.7)         | 3548 (87.5)         | <0.001  |
| Education                               |                         |                     |                     | 0.07    |
| Illiterate [ <i>n</i> (%)]              | 2106 (29.6)             | 900 (30.3)          | 1206 (29.1)         |         |
| Middle school and below [ <i>n</i> (%)] | 2853 (40.1)             | 1146 (38.5)         | 1770 (41.2)         |         |
| High school and above [ <i>n</i> (%)]   | 2157 (30.3)             | 928 (31.2)          | 1229 (29.7)         |         |
| Household per capita income (yuan)      | 6748 (2417~14298)       | 6461 (2337~13487)   | 7276 (2500~15600)   | 0.02    |
| Drink [ <i>n</i> (%)]                   | 2461 (34.6)             | 1054 (35.4)         | 1470 (32.2)         | 0.20    |
| Smoke [ <i>n</i> (%)]                   | 2775 (39.0)             | 1208 (40.6)         | 1567 (37.8)         | 0.02    |
| Blood urea nitrogen (mg/dl)             | 15.1 (12.52~17.90)      | 15.0 (12.5~17.8)    | 15.1 (12.8~18.0)    | 0.16    |
| Fasting glucose (mg/dl)                 | 102.4 (94.5~111.6)      | 102.4 (94.9~111.2)  | 102.1 (94.1~112.5)  | 0.72    |
| Creatinine (mg/dl)                      | 0.76 (0.64~0.86)        | 0.75 (0.64~0.85)    | 0.76 (0.66~0.88)    | <0.001  |
| Total cholesterol (mg/dl)               | 190.2 (168.2~215.3)     | 190.6 (168.6~215.7) | 189.8 (167.4~214.9) | 0.36    |
| Triglyceride (mg/dl)                    | 104.4 (74.34~147.8)     | 105.3 (74.34~148.7) | 104.4 (73.46~147.8) | 0.77    |
| HDL cholesterol (mg/dl)                 | 49.5 (41.0~59.9)        | 49.1 (41.0~59.5)    | 49.9 (41.4~60.3)    | 0.02    |
| hs-CRP (mg/l)                           | 1.03 (0.54~2.04)        | 1.02 (0.54~1.97)    | 1.04 (0.55~2.17)    | 0.62    |
| GHbA1c (%)                              | 5.1 (4.9~5.4)           | 5.1 (4.9~5.4)       | 5.1 (4.9~5.4)       | 0.65    |
| Uric acid (mg/dl)                       | 4.3 (3.6~5.1)           | 4.2 (3.5~5.0)       | 4.4 (3.6~5.1)       | <0.001  |
| Hemoglobin (mg/dl)                      | 14.2 (13.1~15.5)        | 14.2 (13.1~15.5)    | 14.2 (13.1~15.5)    | 0.75    |
| Height (cm)                             | 157.9 (152.0~164.1)     | 157.7 (152.0~163.8) | 157.9 (152~164.5)   | 0.74    |
| Weight (kg)                             | 57.7 (51.0~65.4)        | 58.0 (51.3~65.5)    | 57.5 (50.3~65.2)    | 0.01    |
| Waist (cm)                              | 84.3 (77.6~91.4)        | 84.4 (78.0~92.0)    | 84.0 (77.0~91.0)    | 0.08    |
| Body mass index (kg/m <sup>2</sup> )    | 23.1 (20.8~25.6)        | 23.2 (21.0~25.7)    | 22.9 (20.6~25.5)    | 0.01    |
| Hand grip strength (kg)                 | 29.3 (23.5~36.5)        | 29.1 (23.0~36.5)    | 29.3 (23.8~36.5)    | 0.59    |
| Systolic blood pressure (mmHg)          | 127.3 (114.7~141.3)     | 127.0 (114.3~141.0) | 127.7 (115.3~142.0) | 0.32    |
| Diastolic blood pressure (mmHg)         | 74.7 (67.3~83.0)        | 74.7 (67.0~82.7)    | 75.0 (67.3~83.0)    | 0.34    |
| Mean arterial pressure (mmHg)           | 92.6 (83.7~102.0)       | 92.2 (83.4~101.7)   | 92.6 (84.0~102.6)   | 0.28    |
| eGFR (ml/min/1.73m <sup>2</sup> )       | 95.2 (85.5~102.7)       | 95.9 (86.4~102.9)   | 94.0 (84.3~102.3)   | <0.001  |
| Depression symptom [ <i>n</i> (%)]      | 3172 (44.6)             | 1268 (42.6)         | 1904 (46.0)         | 0.005   |
| Metabolic syndrome [ <i>n</i> (%)]      | 2228 (31.3)             | 907 (30.5)          | 1321 (31.9)         | 0.21    |
| Metabolic syndrome components           |                         |                     |                     |         |
| Elevated blood pressure [ <i>n</i> (%)] | 3622 (50.9)             | 1523 (51.2)         | 2099 (50.7)         | 0.66    |
| Elevated blood glucose [ <i>n</i> (%)]  | 4179 (58.7)             | 1723 (57.9)         | 2456 (59.3)         | 0.25    |
| Dyslipidemia [ <i>n</i> (%)]            | 2673 (37.6)             | 1078 (36.2)         | 1595 (38.5)         | 0.052   |
| Central obesity [ <i>n</i> (%)]         | 2862 (40.2)             | 1136 (38.2)         | 1726 (41.7)         | 0.003   |

Data are *n* (%) or median (interquartile range); HDL: high density lipoprotein; hs-CRP: high-sensitivity C-reactive protein; eGFR: estimated glomerular filtration rate; MetS: metabolic syndrome. Group 1: participants included in the baseline and excluded after follow-up; Group 2: participants included in the study.

**Table S2. Univariate analysis of variables between eGFR decline group and non-rapid eGFR**

| <b>decline group</b>                            |              |                  |                |
|-------------------------------------------------|--------------|------------------|----------------|
| <b>Characteristics</b>                          | <b>Coef.</b> | <b>95% Conf.</b> | <b>P-value</b> |
| Sex (female as ref)                             | 0.200        | 0.038~0.362      | 0.02           |
| Age (years)                                     | 0.011        | 0.002~0.021      | 0.02           |
| Married status [ <i>n</i> (%)]                  |              |                  |                |
| Other married status                            | ref          | ref              |                |
| Married with spouse                             | 0.013        | -0.218~0.245     | 0.91           |
| Education                                       |              |                  |                |
| Illiterate                                      | ref          | ref              |                |
| Middle school and below                         | 0.160        | --0.037~0.359    | 0.11           |
| High school and above                           | 0.097        | -0.118~0.311     | 0.34           |
| Household per capita income (per 10000 yuan)    | 0.005        | -0.053~0.062     | 0.88           |
| Drink [ <i>n</i> (%)]                           |              |                  |                |
| Smoke [ <i>n</i> (%)]                           | 0.022        | -0.145~0.188     | 0.80           |
| Blood urea nitrogen (mg/dl)                     | 0.019        | -0.001~0.038     | 0.06           |
| Fasting glucose (mg/dl)                         | -0.002       | -0.005~0.001     | 0.28           |
| Creatinine (mg/dl)                              | -1.818       | -2.368~-1.268    | <0.001         |
| Total cholesterol (mg/dl)                       | -0.001       | -0.004~0.001     | 0.21           |
| Triglyceride (mg/dl)                            | -0.0004      | -0.0014~0.0050   | 0.39           |
| HDL cholesterol (mg/dl)                         | 0.007        | -0.005~0.006     | 0.80           |
| hs-CRP (mg/l)                                   | 0.004        | -0.013~0.020     | 0.66           |
| GHbA1c (%)                                      | -0.051       | -0.167~0.066     | 0.40           |
| Uric acid (mg/dl)                               | 0.003        | -0.066~0.072     | 0.93           |
| Hemoglobin (mg/dl)                              | -0.102       | -0.144~-0.060    | <0.001         |
| eGFR (ml/min/1.73m <sup>2</sup> )               | 0.023        | 0.017~0.030      | <0.001         |
| eGFR group                                      |              |                  |                |
| 60~89 ml/min/1.73m <sup>2</sup> [ <i>n</i> (%)] | ref          | ref              |                |
| 90~ ml/min/1.73m <sup>2</sup> [ <i>n</i> (%)]   | 0.203        | 0.026~0.379      | 0.02           |
| Grip strength (kg)                              | 0.004        | -0.005~0.012     | 0.38           |
| Grip strength group                             |              |                  |                |
| T1 [ <i>n</i> (%)]                              | ref          | ref              |                |
| T2 [ <i>n</i> (%)]                              | 0.311        | 0.112~0.511      | <0.01          |
| T3 [ <i>n</i> (%)]                              | 0.148        | -0.056~0.353     | 0.16           |
| Height (cm)                                     | 0.003        | -0.007~0.013     | 0.58           |
| Weight (kg)                                     | -0.008       | -0.015~0.000     | 0.048          |
| Body mass index (kg/m <sup>2</sup> )            | -0.032       | -0.056~-0.009    | 0.01           |
| Waist circumference (cm)                        | -0.012       | -0.018~-0.005    | <0.001         |
| Systolic blood pressure (mmHg)                  | 0.002        | -0.002~0.006     | 0.33           |



|    |                                                     |        |              |       |
|----|-----------------------------------------------------|--------|--------------|-------|
| 1  |                                                     |        |              |       |
| 2  |                                                     |        |              |       |
| 3  | Diastolic blood pressure (mmHg)                     | -0.001 | -0.008~0.005 | 0.76  |
| 4  | Mean arterial pressure (mmHg)                       | 0.001  | -0.005~0.007 | 0.75  |
| 5  | Depression symptom [ <i>n</i> (%)]                  | -0.054 | -0.216~0.109 | 0.52  |
| 6  | Self-report hypertension [ <i>n</i> (%)]            | 0.047  | -0.148~0.243 | 0.63  |
| 7  | Self-report dyslipidemia [ <i>n</i> (%)]            | 0.019  | -0.276~0.315 | 0.90  |
| 8  | Self-report diabetes or HbG [ <i>n</i> (%)]         | -0.196 | -0.065~0.213 | 0.35  |
| 9  | Self-report arthritis or rheumatism [ <i>n</i> (%)] | -0.032 | -0.204~0.140 | 0.71  |
| 10 | Antihypertensive therapy [ <i>n</i> (%)]            | 0.062  | -0.155~0.280 | 0.57  |
| 11 | Lipid-lowering therapy [ <i>n</i> (%)]              | 0.183  | -0.186~0.552 | 0.33  |
| 12 | Hypoglycemic therapy [ <i>n</i> (%)]                | -0.169 | -0.663~0.326 | 0.50  |
| 13 | Therapy for arthritis or rheumatism [ <i>n</i> (%)] | 0.072  | -0.148~0.291 | 0.52  |
| 14 | Metabolic syndrome [ <i>n</i> (%)]                  | -0.158 | -0.334~0.019 | 0.08  |
| 15 | MetS scores                                         | -0.138 | -0.279~0.003 | 0.055 |
| 16 | Metabolic syndrome components                       |        |              |       |
| 17 | Central obesity [ <i>n</i> (%)]                     | -0.229 | -0.395~0.062 | 0.01  |
| 18 | Elevated blood pressure [ <i>n</i> (%)]             | 0.052  | -0.109~0.214 | 0.53  |
| 19 | Dyslipidemia [ <i>n</i> (%)]                        | 0.030  | -0.135~0.196 | 0.72  |
| 20 | Elevated blood glucose [ <i>n</i> (%)]              | -0.268 | -0.431~0.105 | 0.001 |

21 Data are *n* (%) or median (interquartile range); HDL: high density lipoprotein; hs-CRP: high-sensitivity C-reactive  
 22 protein; eGFR:

23 estimated glomerular filtration rate; MetS: metabolic syndrome.

24 grip strength is divided into T1, T2 and T3 groups by one-third percentile.

## STROBE Statement

Checklist of items that should be included in reports of observational studies

| Section/Topic            | Item No | Recommendation                                                                                                                                                                             | Reported on Page No |
|--------------------------|---------|--------------------------------------------------------------------------------------------------------------------------------------------------------------------------------------------|---------------------|
| Title and abstract       | 1       | (a) Indicate the study's design with a commonly used term in the title or the abstract                                                                                                     | P1L1-3              |
|                          |         | (b) Provide in the abstract an informative and balanced summary of what was done and what was found                                                                                        | P2-3L27-54          |
| <b>Introduction</b>      |         |                                                                                                                                                                                            |                     |
| Background/rationale     | 2       | Explain the scientific background and rationale for the investigation being reported                                                                                                       | P4L71-91            |
| Objectives               | 3       | State specific objectives, including any prespecified hypotheses                                                                                                                           | P4-5L97-100         |
| <b>Methods</b>           |         |                                                                                                                                                                                            |                     |
| Study design             | 4       | Present key elements of study design early in the paper                                                                                                                                    | -                   |
| Setting                  | 5       | Describe the setting, locations, and relevant dates, including periods of recruitment, exposure, follow-up, and data collection                                                            | P5L103-106          |
| Participants             | 6       | (a) <i>Cohort study</i> —Give the eligibility criteria, and the sources and methods of selection of participants. Describe methods of follow-up                                            | P5L107-112          |
|                          |         | <i>Case-control study</i> —Give the eligibility criteria, and the sources and methods of case ascertainment and control selection. Give the rationale for the choice of cases and controls |                     |
|                          |         | <i>Cross-sectional study</i> —Give the eligibility criteria, and the sources and methods of selection of participants                                                                      |                     |
| Variables                | 7       | (b) <i>Cohort study</i> —For matched studies, give matching criteria and number of exposed and unexposed                                                                                   | -                   |
|                          |         | <i>Case-control study</i> —For matched studies, give matching criteria and the number of controls per case                                                                                 |                     |
| Data sources/measurement | 8*      | Clearly define all outcomes, exposures, predictors, potential confounders, and effect modifiers. Give diagnostic criteria, if applicable                                                   | P6-8L138-201        |
| Bias                     | 9       | For each variable of interest, give sources of data and details of methods of assessment (measurement). Describe comparability of assessment methods if there is more than one group       | P5-6L117-136        |
| Study size               | 10      | Describe any efforts to address potential sources of bias                                                                                                                                  | -                   |
| Quantitative variables   | 11      | Explain how the study size was arrived at                                                                                                                                                  | P5L112              |
| Statistical methods      | 12      | Explain how quantitative variables were handled in the analyses. If applicable, describe which groupings were chosen and why                                                               | -                   |
|                          |         | (a) Describe all statistical methods, including those used to control for confounding                                                                                                      | P8-9L203-219        |
|                          |         | (b) Describe any methods used to examine subgroups and interactions                                                                                                                        | P9L219-223          |
|                          |         | (c) Explain how missing data were addressed                                                                                                                                                | -                   |
|                          |         | (d) <i>Cohort study</i> —If applicable, explain how loss to follow-up was addressed                                                                                                        | -                   |
|                          |         | <i>Case-control study</i> —If applicable, explain how matching of cases and controls was addressed                                                                                         | -                   |
|                          |         | <i>Cross-sectional study</i> —If applicable, describe analytical methods taking account of sampling strategy                                                                               | -                   |
|                          |         | (e) Describe any sensitivity analyses                                                                                                                                                      | -                   |

| Section/Topic            | Item No | Recommendation                                                                                                                                                                                               | Reported on Page No |
|--------------------------|---------|--------------------------------------------------------------------------------------------------------------------------------------------------------------------------------------------------------------|---------------------|
| <b>Results</b>           |         |                                                                                                                                                                                                              |                     |
| Participants             | 13*     | (a) Report numbers of individuals at each stage of study—eg numbers potentially eligible, examined for eligibility, confirmed eligible, included in the study, completing follow-up, and analysed            | P9L233-237          |
|                          |         | (b) Give reasons for non-participation at each stage                                                                                                                                                         | -                   |
|                          |         | (c) Consider use of a flow diagram                                                                                                                                                                           | P9L233              |
| Descriptive data         | 14*     | (a) Give characteristics of study participants (eg demographic, clinical, social) and information on exposures and potential confounders                                                                     | P10L240-245         |
|                          |         | (b) Indicate number of participants with missing data for each variable of interest                                                                                                                          | -                   |
|                          |         | (c) <i>Cohort study</i> —Summarise follow-up time (eg, average and total amount)                                                                                                                             | P9-10L238-240       |
| Outcome data             | 15*     | <i>Cohort study</i> —Report numbers of outcome events or summary measures over time                                                                                                                          | P9-10L238-240       |
|                          |         | <i>Case-control study</i> —Report numbers in each exposure category, or summary measures of exposure                                                                                                         | -                   |
|                          |         | <i>Cross-sectional study</i> —Report numbers of outcome events or summary measures                                                                                                                           | -                   |
| Main results             | 16      | (a) Give unadjusted estimates and, if applicable, confounder-adjusted estimates and their precision (eg, 95% confidence interval). Make clear which confounders were adjusted for and why they were included | P10L247-255         |
|                          |         | (b) Report category boundaries when continuous variables were categorized                                                                                                                                    | -                   |
|                          |         | (c) If relevant, consider translating estimates of relative risk into absolute risk for a meaningful time period                                                                                             | -                   |
| Other analyses           | 17      | Report other analyses done—eg analyses of subgroups and interactions, and sensitivity analyses                                                                                                               | P10-11L257-267      |
| <b>Discussion</b>        |         |                                                                                                                                                                                                              |                     |
| Key results              | 18      | Summarise key results with reference to study objectives                                                                                                                                                     | P11L269-275         |
| Limitations              | 19      | Discuss limitations of the study, taking into account sources of potential bias or imprecision. Discuss both direction and magnitude of any potential bias                                                   | P12-13L316-329      |
| Interpretation           | 20      | Give a cautious overall interpretation of results considering objectives, limitations, multiplicity of analyses, results from similar studies, and other relevant evidence                                   | P11-12L276-315      |
| Generalisability         | 21      | Discuss the generalisability (external validity) of the study results                                                                                                                                        | P12L331-336         |
| <b>Other Information</b> |         |                                                                                                                                                                                                              |                     |
| Funding                  | 22      | Give the source of funding and the role of the funders for the present study and, if applicable, for the original study on which the present article is based                                                | P13L343-346         |

\*Give information separately for cases and controls in case-control studies and, if applicable, for exposed and unexposed groups in cohort and cross-sectional studies.

**Note:** An Explanation and Elaboration article discusses each checklist item and gives methodological background and published examples of transparent reporting. The STROBE checklist is best used in conjunction with this article (freely available on the Web sites of PLoS Medicine at <http://www.plosmedicine.org/>, Annals of Internal Medicine at <http://www.annals.org/>, and Epidemiology at <http://www.epidem.com/>). Information on the STROBE Initiative is available at [www.strobe-statement.org](http://www.strobe-statement.org).
