# Supplementary material for: Association between recovery/occurrence of metabolic syndrome and rapid estimated glomerular filtration rate decline in middle-aged and older populations: evidence from the China Health and Retirement Longitudinal Study
Source: PubMed Central journal article supplement — BMJ Open. 2022 Oct 19;12(10):e059504. doi: 10.1136/bmjopen-2021-059504 (PMC9582318; doi:10.1136/bmjopen-2021-059504), 2022-10-19
Supplement: bmjopen-2021-059504supp001.pdf [file bmjopen-2021-059504supp001.pdf]

**Association between recovery/occurrence of metabolic syndrome and rapid estimated glomerular filtration rate decline in middle-aged and older populations: evidence from the China Health and Retirement Longitudinal Study**

**Peijia Liu,<sup>1,2</sup> Leile Tang,<sup>3</sup> Jia fang,<sup>1</sup> Chaojin Chen,<sup>4\*</sup> Xun Liu<sup>1\*</sup>**

<sup>1</sup>Department of Nephrology, The Third Affiliated Hospital of Sun Yat-Sen University, Guangzhou, Guangdong, China;

<sup>2</sup>Department of Nephrology, The Eighth People's Hospital of Guangzhou, Guangzhou, Guangdong, China;

<sup>3</sup>Department of Cardiology, The Third Affiliated Hospital of Sun Yat-Sen University, Guangzhou, Guangdong, China

<sup>4</sup>Department of Anesthesiology, Third Affiliated Hospital of Sun Yat-sen University, Guangzhou, Guangdong, China

**\*Correspondence to**

Dr Xun Liu;

[naturestyle@163.com](mailto:naturestyle@163.com);

Department of Nephrology,  
The Third Affiliated Hospital of Sun Yat-Sen University,  
Guangzhou, Guangdong, 510630, China

&

Dr Chaojin Chen;

[chenchj28@mail.sysu.edu.cn](mailto:chenchj28@mail.sysu.edu.cn);

Department of Anesthesiology,  
The Third Affiliated Hospital of Sun Yat-Sen University,  
Guangzhou, Guangdong, 510630, China

**Table S1. Baseline characteristics of participants included and excluded in the study**

| Characteristics                         | participants included   |                     |                     | P-value |
|-----------------------------------------|-------------------------|---------------------|---------------------|---------|
|                                         | in baseline<br>(n=7116) | group 1<br>(n=2974) | group 2<br>(n=4142) |         |
| Age (years)                             | 58 (52~65)              | 58 (52~64)          | 58 (51~66)          | 0.98    |
| Male [ <i>n</i> (%)]                    | 3332 (46.8)             | 1458 (49.0)         | 1874 (45.2)         | 0.002   |
| Married with spouse [ <i>n</i> (%)]     | 5977 (84.0)             | 2974 (81.7)         | 3548 (87.5)         | <0.001  |
| Education                               |                         |                     |                     | 0.07    |
| Illiterate [ <i>n</i> (%)]              | 2106 (29.6)             | 900 (30.3)          | 1206 (29.1)         |         |
| Middle school and below [ <i>n</i> (%)] | 2853 (40.1)             | 1146 (38.5)         | 1770 (41.2)         |         |
| High school and above [ <i>n</i> (%)]   | 2157 (30.3)             | 928 (31.2)          | 1229 (29.7)         |         |
| Household per capita income (yuan)      | 6748 (2417~14298)       | 6461 (2337~13487)   | 7276 (2500~15600)   | 0.02    |
| Drink [ <i>n</i> (%)]                   | 2461 (34.6)             | 1054 (35.4)         | 1470 (32.2)         | 0.20    |
| Smoke [ <i>n</i> (%)]                   | 2775 (39.0)             | 1208 (40.6)         | 1567 (37.8)         | 0.02    |
| Blood urea nitrogen (mg/dl)             | 15.1 (12.52~17.90)      | 15.0 (12.5~17.8)    | 15.1 (12.8~18.0)    | 0.16    |
| Fasting glucose (mg/dl)                 | 102.4 (94.5~111.6)      | 102.4 (94.9~111.2)  | 102.1 (94.1~112.5)  | 0.72    |
| Creatinine (mg/dl)                      | 0.76 (0.64~0.86)        | 0.75 (0.64~0.85)    | 0.76 (0.66~0.88)    | <0.001  |
| Total cholesterol (mg/dl)               | 190.2 (168.2~215.3)     | 190.6 (168.6~215.7) | 189.8 (167.4~214.9) | 0.36    |
| Triglyceride (mg/dl)                    | 104.4 (74.34~147.8)     | 105.3 (74.34~148.7) | 104.4 (73.46~147.8) | 0.77    |
| HDL cholesterol (mg/dl)                 | 49.5 (41.0~59.9)        | 49.1 (41.0~59.5)    | 49.9 (41.4~60.3)    | 0.02    |
| hs-CRP (mg/l)                           | 1.03 (0.54~2.04)        | 1.02 (0.54~1.97)    | 1.04 (0.55~2.17)    | 0.62    |
| GHbA1c (%)                              | 5.1 (4.9~5.4)           | 5.1 (4.9~5.4)       | 5.1 (4.9~5.4)       | 0.65    |
| Uric acid (mg/dl)                       | 4.3 (3.6~5.1)           | 4.2 (3.5~5.0)       | 4.4 (3.6~5.1)       | <0.001  |
| Hemoglobin (mg/dl)                      | 14.2 (13.1~15.5)        | 14.2 (13.1~15.5)    | 14.2 (13.1~15.5)    | 0.75    |
| Height (cm)                             | 157.9 (152.0~164.1)     | 157.7 (152.0~163.8) | 157.9 (152~164.5)   | 0.74    |
| Weight (kg)                             | 57.7 (51.0~65.4)        | 58.0 (51.3~65.5)    | 57.5 (50.3~65.2)    | 0.01    |
| Waist (cm)                              | 84.3 (77.6~91.4)        | 84.4 (78.0~92.0)    | 84.0 (77.0~91.0)    | 0.08    |
| Body mass index (kg/m <sup>2</sup> )    | 23.1 (20.8~25.6)        | 23.2 (21.0~25.7)    | 22.9 (20.6~25.5)    | 0.01    |
| Hand grip strength (kg)                 | 29.3 (23.5~36.5)        | 29.1 (23.0~36.5)    | 29.3 (23.8~36.5)    | 0.59    |
| Systolic blood pressure (mmHg)          | 127.3 (114.7~141.3)     | 127.0 (114.3~141.0) | 127.7 (115.3~142.0) | 0.32    |
| Diastolic blood pressure (mmHg)         | 74.7 (67.3~83.0)        | 74.7 (67.0~82.7)    | 75.0 (67.3~83.0)    | 0.34    |
| Mean arterial pressure (mmHg)           | 92.6 (83.7~102.0)       | 92.2 (83.4~101.7)   | 92.6 (84.0~102.6)   | 0.28    |
| eGFR (ml/min/1.73m <sup>2</sup> )       | 95.2 (85.5~102.7)       | 95.9 (86.4~102.9)   | 94.0 (84.3~102.3)   | <0.001  |
| Depression symptom [ <i>n</i> (%)]      | 3172 (44.6)             | 1268 (42.6)         | 1904 (46.0)         | 0.005   |
| Metabolic syndrome [ <i>n</i> (%)]      | 2228 (31.3)             | 907 (30.5)          | 1321 (31.9)         | 0.21    |
| Metabolic syndrome components           |                         |                     |                     |         |
| Elevated blood pressure [ <i>n</i> (%)] | 3622 (50.9)             | 1523 (51.2)         | 2099 (50.7)         | 0.66    |
| Elevated blood glucose [ <i>n</i> (%)]  | 4179 (58.7)             | 1723 (57.9)         | 2456 (59.3)         | 0.25    |
| Dyslipidemia [ <i>n</i> (%)]            | 2673 (37.6)             | 1078 (36.2)         | 1595 (38.5)         | 0.052   |
| Central obesity [ <i>n</i> (%)]         | 2862 (40.2)             | 1136 (38.2)         | 1726 (41.7)         | 0.003   |

Data are *n* (%) or median (interquartile range); HDL: high density lipoprotein; hs-CRP: high-sensitivity C-reactive protein; eGFR: estimated glomerular filtration rate; MetS: metabolic syndrome. Group 1: participants included in the baseline and excluded after follow-up; Group 2: participants included in the study.

**Table S2. Univariate analysis of variables between eGFR decline group and non-rapid eGFR**

| <b>decline group</b>                            |              |                  |                |
|-------------------------------------------------|--------------|------------------|----------------|
| <b>Characteristics</b>                          | <b>Coef.</b> | <b>95% Conf.</b> | <b>P-value</b> |
| Sex (female as ref)                             | 0.200        | 0.038~0.362      | 0.02           |
| Age (years)                                     | 0.011        | 0.002~0.021      | 0.02           |
| Married status [ <i>n</i> (%)]                  |              |                  |                |
| Other married status                            | ref          | ref              |                |
| Married with spouse                             | 0.013        | -0.218~0.245     | 0.91           |
| Education                                       |              |                  |                |
| Illiterate                                      | ref          | ref              |                |
| Middle school and below                         | 0.160        | --0.037~0.359    | 0.11           |
| High school and above                           | 0.097        | -0.118~0.311     | 0.34           |
| Household per capita income (per 10000 yuan)    | 0.005        | -0.053~0.062     | 0.88           |
| Drink [ <i>n</i> (%)]                           |              |                  |                |
| Smoke [ <i>n</i> (%)]                           | 0.022        | -0.145~0.188     | 0.80           |
| Blood urea nitrogen (mg/dl)                     | 0.019        | -0.001~0.038     | 0.06           |
| Fasting glucose (mg/dl)                         | -0.002       | -0.005~0.001     | 0.28           |
| Creatinine (mg/dl)                              | -1.818       | -2.368~-1.268    | <0.001         |
| Total cholesterol (mg/dl)                       | -0.001       | -0.004~0.001     | 0.21           |
| Triglyceride (mg/dl)                            | -0.0004      | -0.0014~0.0050   | 0.39           |
| HDL cholesterol (mg/dl)                         | 0.007        | -0.005~0.006     | 0.80           |
| hs-CRP (mg/l)                                   | 0.004        | -0.013~0.020     | 0.66           |
| GHbA1c (%)                                      | -0.051       | -0.167~0.066     | 0.40           |
| Uric acid (mg/dl)                               | 0.003        | -0.066~0.072     | 0.93           |
| Hemoglobin (mg/dl)                              | -0.102       | -0.144~0.060     | <0.001         |
| eGFR (ml/min/1.73m <sup>2</sup> )               | 0.023        | 0.017~0.030      | <0.001         |
| eGFR group                                      |              |                  |                |
| 60~89 ml/min/1.73m <sup>2</sup> [ <i>n</i> (%)] | ref          | ref              |                |
| 90~ ml/min/1.73m <sup>2</sup> [ <i>n</i> (%)]   | 0.203        | 0.026~0.379      | 0.02           |
| Grip strength (kg)                              | 0.004        | -0.005~0.012     | 0.38           |
| Grip strength group                             |              |                  |                |
| T1 [ <i>n</i> (%)]                              | ref          | ref              |                |
| T2 [ <i>n</i> (%)]                              | 0.311        | 0.112~0.511      | <0.01          |
| T3 [ <i>n</i> (%)]                              | 0.148        | -0.056~0.353     | 0.16           |
| Height (cm)                                     | 0.003        | -0.007~0.013     | 0.58           |
| Weight (kg)                                     | -0.008       | -0.015~0.000     | 0.048          |
| Body mass index (kg/m <sup>2</sup> )            | -0.032       | -0.056~0.009     | 0.01           |
| Waist circumference (cm)                        | -0.012       | -0.018~0.005     | <0.001         |
| Systolic blood pressure (mmHg)                  | 0.002        | -0.002~0.006     | 0.33           |

|                                                     |        |              |       |
|-----------------------------------------------------|--------|--------------|-------|
| Diastolic blood pressure (mmHg)                     | -0.001 | -0.008~0.005 | 0.76  |
| Mean arterial pressure (mmHg)                       | 0.001  | -0.005~0.007 | 0.75  |
| Depression symptom [ <i>n</i> (%)]                  | -0.054 | -0.216~0.109 | 0.52  |
| Self-report hypertension [ <i>n</i> (%)]            | 0.047  | -0.148~0.243 | 0.63  |
| Self-report dyslipidemia [ <i>n</i> (%)]            | 0.019  | -0.276~0.315 | 0.90  |
| Self-report diabetes or HBG [ <i>n</i> (%)]         | -0.196 | -0.065~0.213 | 0.35  |
| Self-report arthritis or rheumatism [ <i>n</i> (%)] | -0.032 | -0.204~0.140 | 0.71  |
| Antihypertensive therapy [ <i>n</i> (%)]            | 0.062  | -0.155~0.280 | 0.57  |
| Lipid-lowering therapy [ <i>n</i> (%)]              | 0.183  | -0.186~0.552 | 0.33  |
| Hypoglycemic therapy [ <i>n</i> (%)]                | -0.169 | -0.663~0.326 | 0.50  |
| Therapy for arthritis or rheumatism [ <i>n</i> (%)] | 0.072  | -0.148~0.291 | 0.52  |
| Metabolic syndrome [ <i>n</i> (%)]                  | -0.158 | -0.334~0.019 | 0.08  |
| MetS scores                                         | -0.138 | -0.279~0.003 | 0.055 |
| Metabolic syndrome components                       |        |              |       |
| Central obesity [ <i>n</i> (%)]                     | -0.229 | -0.395~0.062 | 0.01  |
| Elevated blood pressure [ <i>n</i> (%)]             | 0.052  | -0.109~0.214 | 0.53  |
| Dyslipidemia [ <i>n</i> (%)]                        | 0.030  | -0.135~0.196 | 0.72  |
| Elevated blood glucose [ <i>n</i> (%)]              | -0.268 | -0.431~0.105 | 0.001 |

Data are *n* (%) or median (interquartile range); HDL: high density lipoprotein; hs-CRP: high-sensitivity C-reactive protein; eGFR:

estimated glomerular filtration rate; MetS: metabolic syndrome.

grip strength is divided into T1, T2 and T3 groups by one-third percentile.
